# Supplementary material
Source: PubMed Central journal article supplement (PMC7654210)

# Supporting Information

## A Broad Substrate Scope of aza-Friedel–Crafts Alkylation for the Synthesis of Quaternary $\alpha$ -Amino Esters.

Guangkuan Zhao,<sup>a</sup> Shyam S. Samanta,<sup>a,‡</sup> Jessica Michieletto,<sup>a,‡</sup> and Stéphane P. Roche<sup>a,b\*</sup>

<sup>a</sup> Department of Chemistry and Biochemistry, Florida Atlantic University, Boca Raton, Florida 33431, United States

<sup>b</sup> Center for Molecular Biology and Biotechnology, Florida Atlantic University, Jupiter, Florida 33458, United States

sroche2@fau.edu

### Table of Content

|                                                                                                       |       |
|-------------------------------------------------------------------------------------------------------|-------|
| I. General Information                                                                                | SI-2  |
| II. Reaction Optimization for Chloride Abstraction with Silver Salts                                  | SI-3  |
| III. Reaction Optimization for a catalytic enantioselective aza-Friedel–Crafts Alkylation with indole | SI-7  |
| IV. Synthetic Procedures and Compounds Characterization                                               | SI-15 |
| V. References                                                                                         | SI-24 |
| VI. NMR Spectra                                                                                       | SI-25 |

## I. General Information

Reagents are commercially available (from Alfa Aesar or Sigma Aldrich) and used without further purification. All reactions were carried out in flame-dried vessels under an atmosphere of argon and in anhydrous solvents unless stated otherwise. Toluene was distilled over sodium in the presence of benzophenone before use;  $\text{CH}_2\text{Cl}_2$  and  $\text{CHCl}_3$  were distilled over calcium hydride. Dry solvents were transferred under argon to a dark glass bottle containing activated 3Å molecular sieves for storage. Reactions were monitored by analytical TLC on Silicycle silica gel 60-F254 glass backed (ref. TLG-R10011B-323) via UV absorption followed by vanillin- $\text{H}_2\text{SO}_4$  (1% vanillin in ethanol + 2%  $\text{H}_2\text{SO}_4$ ), ceric ammonium molybdate (CAM), or ninhydrin (0.25% ninhydrin in ethanol + 3% ACOH) as staining system. The products were purified over silica gel column chromatography (Silicycle silica gel, 40-63  $\mu\text{m}$ , ref. R10030B). NMR spectra were recorded on a Bruker 400 MHz Avance III spectrometer.  $^1\text{H}$ -decoupled and APT (attached proton test)  $^{13}\text{C}$  NMR spectra must be recorded with an adjustment of relaxation delay (d1) to larger values ( $d1 \geq 4s$ ) to observed optimal signal for both quaternary perfluorinated-geminal and vicinal carbons. Chemical shifts ( $\delta$ ) are quoted in ppm with internal calibration from residual solvent peak with  $\text{CDCl}_3$ : 7.26, 77.0 ppm;  $\text{DMSO}-d_6$ : 2.50, 39.5 ppm;  $\text{CD}_3\text{CN}$ : 1.94, 1.32 ppm for  $^1\text{H}$  and  $^{13}\text{C}$  NMR, respectively, and  $\text{C}_6\text{F}_6$ : -161.64 ppm for  $^{19}\text{F}$  NMR. All coupling constants ( $J$ ) are quoted in Hertz. The following abbreviations are used to designate multiplicities: s = singlet, d = doublet, t = triplet, q = quartet, m = multiplet, br = broad. Mass spectra ( $m/z$ ) and High-resolution spectra (HRMS) were obtained from the University of Florida using an Agilent 6210 TOF instrument, using electrospray ionization (ESI) or direct analysis in real time (DART). Infrared spectra were recorded on a Nicolet IS5 FT-IR spectrophotometer. Melting points were measured on a MPA 160 digital apparatus.

## II. Reaction Optimization for Chloride Abstraction with Silver Salts

Fluorinated amino acids have recently attracted considerable attention due to their outstanding physicochemical and medicinal properties (e.g. high stability to metabolic degradation, increased lipophilicity and hydrogen-bond acceptor ability).<sup>[SI-1]</sup> For these reasons, we initiated a collaborative project for the synthesis  $\alpha$ -perfluorinated  $\alpha,\alpha$ -disubstituted amino esters at the Automated Synthesis Laboratory (ASL) at Eli Lilly. The ASL program operated by Eli Lilly from 2013 to 2018<sup>[SI-2]</sup> was developed to initiate industry-academic collaborations for the synthesis of compound libraries to identify new medicinally promising building blocks that are currently not available in the company repository.

### a. Silver salt screening:

Given that reaction monitoring on the fully automated and remotely-controlled robotic system was achieved by syringing out aliquots for LC-MS analysis, the instability of the chloroaminal starting material **2a** became a major drawback for automated reaction optimization (chloroaminal to hemiaminal transformation upon work-up). Therefore, we turned our attention to optimizing the reaction conditions with the selected most reactive *N*-methyl indole **5c** nucleophile (3.0 eq.) by *in situ* <sup>1</sup>H NMR, which can be accomplished at higher concentrations (0.5 M) to shorten reaction times (Table SI-1). Some common silver (I) salts were tested such as AgOAc or the more ionizing AgBF<sub>4</sub> and AgSbF<sub>6</sub> but, in each case, the desired Friedel-Crafts reactions did not occur. AgBF<sub>4</sub> and AgSbF<sub>6</sub> promoted extended decomposition, while AgOAc (entry 1) favored the formation of the acetylated hemiaminal product. Reactions carried out with AgOTs (entry 2), or the relatively insoluble AgNO<sub>3</sub> (entry 3) afforded the desired  $\alpha$ -amino ester **4c** in 80 and 72% yield respectively.

**Table SI-1.** Selected key reaction conditions from a screening of experiments at the ASL

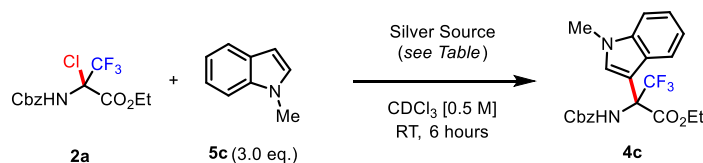

| Entry            | Silver source (Ag <sup>+</sup> eq.)       | % Conversion <sup>a</sup> |     | % Yield <sup>a</sup> |
|------------------|-------------------------------------------|---------------------------|-----|----------------------|
|                  |                                           | 3 h                       | 6 h |                      |
| 1                | AgOAc (2.0 eq.)                           | 65                        | 90  | ... <sup>d</sup>     |
| 2                | AgOTs (2.0 eq.)                           | 66                        | 100 | 80                   |
| 3                | AgNO <sub>3</sub> (2.0 eq.)               | 85                        | 100 | 72                   |
| 4 <sup>b</sup>   | Ag <sub>2</sub> CO <sub>3</sub> (2.0 eq.) | 72                        | 82  | 74                   |
| 5 <sup>b,c</sup> | Ag <sub>2</sub> CO <sub>3</sub> (2.0 eq.) | 58                        | 100 | 68                   |
| 6 <sup>b</sup>   | Ag <sub>2</sub> CO <sub>3</sub> (1.5 eq.) | 62                        | 100 | 95                   |

<sup>a</sup> conversions and yields were determined by <sup>1</sup>H NMR of the crude reaction mixtures;

<sup>b</sup> 4 Å MS was added to the reaction mixture; <sup>c</sup> Triflic acid (20 mol%) was added.

<sup>d</sup> The major product was acetoxy-aminal which was generated via displacement of chloride by acetate

To avoid the counteranion effect and the stoichiometric formation of strong Brønsted acids (HNO<sub>3</sub>, TsOH), silver carbonate (Ag<sub>2</sub>CO<sub>3</sub>) was also evaluated for the halogen abstraction in this reaction (Entries 4-6). Indeed, as shown in entry 4, the reaction with Ag<sub>2</sub>CO<sub>3</sub> led to 82% conversion and a 74% yield after six hours. To test our hypothesis about the potential role of Brønsted acid in the reaction, 20 mol% of triflic acid was added to the reaction. The results from entries 4 vs 5 were very comparable, but the reaction with acid underwent full conversion with somehow a lower NMR yield. Finally, the equivalents of Ag<sub>2</sub>CO<sub>3</sub> and of nucleophile **5c** were lowered to 1.5 eq. and 2.0 eq. respectively, and the reaction proceeded smoothly as shown by the 95% NMR yield in product **4c** (entry 6).

### b. Solvent Screening:

The choice of solvent might play a crucial role in the reaction due to the initial solubility of the silver salts reagents and the silver chloride byproduct; therefore, a solvent screen was achieved at (0.5 M) concentration (Table SI-2). Upon exposure of chloroaminal **2a** to Ag<sub>2</sub>CO<sub>3</sub> (1.5 eq., 3.0 eq. in Ag<sup>+</sup>) and nucleophile **5c** (2.0 eq.), reactions in various solvents were monitored over the course of six hours. When polar protic and aprotic solvents were used (e.g. DMF, DMSO, CH<sub>3</sub>CN, acetone), full conversions were observed, along with large amounts of decomposition leading to ~25% yield of the desired product **4c** (Entries 1-2). For comparison, reactions in aprotic apolar solvents (Entries 3-5), reactions proceeded smoothly with a reaction in dichloromethane being the most efficient with a full conversion observed after 6 hours, and an NMR yield of 85% (Entry 5). Having identified optimal reaction conditions, we were then able to reevaluate the reaction performance on the automated chemical synthesis platform. To our delight, both reactions in hexane and dichloromethane (Entries 4-5) were highly reproducible and product **4c** was isolated on the automatized system in 52% and 50% yields respectively.

**Table SI-2.** Solvents tested for the Friedel–Crafts mediated by silver carbonate

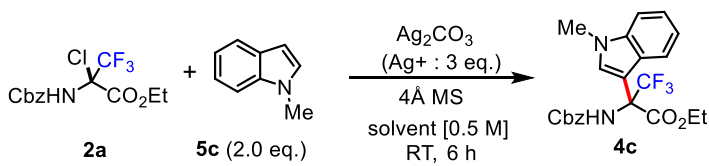

| Entry | Solvent                         | % Conversion <sup>a</sup> |     | % Yield <sup>a,b</sup> |
|-------|---------------------------------|---------------------------|-----|------------------------|
|       |                                 | 3 h                       | 6 h |                        |
| 1     | DMF                             | 20                        | 100 | 25                     |
| 2     | CH <sub>3</sub> CN              | 20                        | 100 | 25                     |
| 3     | toluene                         | 58                        | 100 | 74                     |
| 4     | hexane                          | 44                        | 85  | 76 (52) <sup>b</sup>   |
| 5     | CH <sub>2</sub> Cl <sub>2</sub> | 78                        | 100 | 85 (50) <sup>b</sup>   |

<sup>a</sup> Conversions and yields were determined by <sup>1</sup>H NMR of the crude reaction mixtures;

<sup>b</sup> Isolated yields, for reactions conducted on the automatized robot for 20 hours.

Having an initial set of optimized conditions for the synthesis of the  $\alpha$ , $\alpha$ -disubstituted amino esters **2a**, produced by *N*-methyl indole **5c** in the Friedel–Crafts functionalization, we turned our attention to the less reactive 1,3-dimethoxy benzene nucleophile **5b** (Table SI-3). The evaluation of novel reaction conditions was achieved using the two aromatic nucleophiles and some common silver(I) salts for halogen abstraction. The reaction **5c** as nucleophile was tested using AgOTf and AgOTs as shown in entries 1-2. The milder reaction conditions using silver tosylate, which was thought to generate a stoichiometric amount of *p*-toluenesulfonic acid, afforded the desired amino ester **4c** in 31% yield. Using similar reaction

**Table SI-3.** Reaction optimization for the Friedel–Crafts alkylation with weaker  $\pi$ -nucleophile **5b**

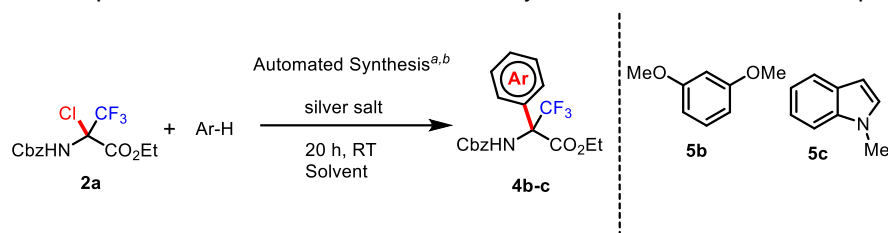

| Entry            | Solvent [Conc.]                         | Silver source (Ag <sup>+</sup> eq.) | Arene (eq.)         | Product (% Yield) <sup>d</sup> |
|------------------|-----------------------------------------|-------------------------------------|---------------------|--------------------------------|
| 1                | CH <sub>2</sub> Cl <sub>2</sub> [0.1 M] | AgOTf (2.0 eq.)                     | <b>5c</b> (2.0 eq.) | <b>4c</b> (<10%)               |
| 2                | CH <sub>2</sub> Cl <sub>2</sub> [0.1 M] | AgOTs (1.0 eq.)                     | <b>5c</b> (1.5 eq.) | <b>4c</b> (31%)                |
| 3                | CH <sub>2</sub> Cl <sub>2</sub> [0.1 M] | AgOTs (1.0 eq.)                     | <b>5b</b> (1.5 eq.) | NR                             |
| 4                | THF [0.1 M]                             | AgOTf (2.0 eq.)                     | <b>5b</b> (2.0 eq.) | <b>4b</b> (<10%)               |
| 5                | CH <sub>2</sub> Cl <sub>2</sub> [0.1 M] | AgOTf (2.0 eq.)                     | <b>5b</b> (2.0 eq.) | <b>4b</b> (29%)                |
| 6 <sup>b</sup>   | CH <sub>2</sub> Cl <sub>2</sub> [0.3 M] | AgOTf (3.0 eq.)                     | <b>5b</b> (2.0 eq.) | <b>4b</b> (25%) <sup>d</sup>   |
| 7 <sup>b,c</sup> | Et <sub>2</sub> O [0.3 M]               | AgOTf (2.0 eq.)                     | <b>5b</b> (2.0 eq.) | <b>4b</b> (71%) <sup>d</sup>   |

<sup>a</sup> Reactions carried on a robot at the automated synthesis laboratory facility @ Lilly; <sup>b</sup> Reaction carried at the bench for control and optimization; <sup>c</sup> Reaction carried for 48 hours; <sup>d</sup> NMR yield obtained on crude reaction mixture.

conditions with **5b** as nucleophile was unsuccessful to deliver the desired product (Entry 3). Switching to silver triflate was required for the reaction to proceed (Entries 4-7). While the reaction was poorly efficient in THF (Entry 4), substantially more desired product **4b** was obtained in dichloromethane with efficacy between 25-29% yields as shown in entries 5-6. To further optimize the AgOTf-mediated conditions, reactions were performed at the bench where we increased both concentration of starting material [0.3 M] and the equivalents of silver source as shown in entries 6-7. It was found that the reaction was highly efficient in diethyl ether (Et<sub>2</sub>O) leading to a full conversion and 71% yield of the desired  $\alpha$ -amino ester **4b** as judged by <sup>1</sup>H NMR. Given the low flashpoint of Et<sub>2</sub>O, such solvents are strictly prohibited on an automated synthesis system, therefore an alternative for Et<sub>2</sub>O was investigated but unfortunately reactions carried under similar conditions to entry 7, in other ethereal solvents (THF, 1,4-dioxane or TBDME) afforded the desired product **5b** only with low conversion and poor yields (< 10% yield).

**Table SI-4.** Initial reaction discovery screen at the ASL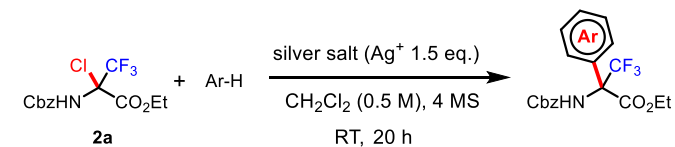

arenes tested:

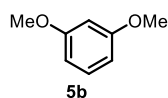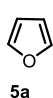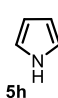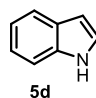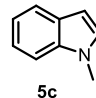

| Entry | Nucleophilicity (N) <sup>a</sup> | Silver source                   | Arene     | Product (% Yield)             |
|-------|----------------------------------|---------------------------------|-----------|-------------------------------|
| 1     | 1.33                             | AgOTf                           | <b>5a</b> | <b>4a</b> (9) <sup>b,c</sup>  |
|       |                                  | Ag <sub>2</sub> CO <sub>3</sub> | <b>5a</b> | NR                            |
| 2     | 2.48                             | AgOTf                           | <b>5b</b> | <b>4b</b> (31) <sup>b,c</sup> |
|       |                                  | Ag <sub>2</sub> CO <sub>3</sub> | <b>5b</b> | NR                            |
| 3     | 4.63                             | Ag <sub>2</sub> CO <sub>3</sub> | <b>5h</b> | <b>4h</b> (71)                |
| 4     | 5.55                             | Ag <sub>2</sub> CO <sub>3</sub> | <b>5d</b> | <b>4d</b> (55)                |
| 5     | 5.75                             | Ag <sub>2</sub> CO <sub>3</sub> | <b>5c</b> | <b>4c</b> (61)                |

<sup>a</sup> The nucleophilicity values adapted from the Mayr's scale; <sup>b</sup> Impurities still present after purification (possible regioisomer); <sup>c</sup> Reactions performed without 4Å MS.

The overall results of reaction discovery obtained at the ASL are summarized in Table SI-4. When reactions of chloroaminal **2** were attempted with arenes of low nucleophilicity **5b** and **5a** (entries 1-2), the halogen abstraction mediated by Ag<sub>2</sub>CO<sub>3</sub> was inefficient thus the Friedel–Crafts reaction did not take place in an efficient manner. In this case, the corresponding imine was formed, but the low Lewis basicity and electrophilicity of this intermediate does not allow for weak arene nucleophiles to add and achieve the Friedel–Crafts reaction. Therefore, the use of AgOTf was required; this reagent likely generates triflic acid, which might protonate the imine to facilitate the arylation and deliver **4b** and **4c** albeit in low yields (31% and 9% yields respectively). Finally, for electron-rich arenes **5h**, **5d** and **5c**, the optimum reaction conditions developed with Ag<sub>2</sub>CO<sub>3</sub> were applied and the corresponding products **4h**, **4d** and **4c** were isolated in reasonable yields of 71%, 55% and 61%, respectively (Entries 3-5). In this case, the postulated imine intermediate was not observed by <sup>1</sup>H or <sup>19</sup>F NMR (at 1, 6, 20 hours), thus suggesting that AgOTf, or the TfOH byproduct might enhance the Friedel–Crafts arylation rate. This hypothesis was later confirmed by several control experiments of imine reactivity.

### III. Reaction Optimization for a catalytic enantioselective aza-Friedel–Crafts Alkylation with indole

Imine **3** was prepared and quickly isolated (filtration under argon) to be further reacted with indole **5d** which proceeded with low conversions at room temperature in 24 hours with complete regioselectivity. Phosphoric acid at room temperature with indole **5d** as nucleophile was relatively efficient and delivered **4d** in 46% yield with a 86:14 regioisomer ratio as determined by  $^{19}\text{F}$  NMR. To our surprise the major C3-regioisomer product was found to be contaminated with the C2-regioisomer. The enantiomeric ratio measured for this mixture of isomers by chiral HPLC was e.r. = 79:21. As the C2-regioisomer coelutes with the minor enantiomer (–)-**4d**, a corrected enantiomeric ratio was estimated, based on the fact that the HPLC peak at 8.088 min, (minor enantiomer) contains 67% of regioisomers (corresponding to 14% overall). Thus a corrected e.r. = 93:07 was calculated (86% e.e.). This results suggests that a Brønsted catalysis might be operating in the second step after halide abstraction. Also, under similar conditions, reaction of chloroaminal (±)-**2a** delivered the same product (+)-**4d** in a much higher enantiomeric ratio (corrected e.r. >99.5:0.5). Taken together, these results suggest that the (*R*)-TRIP catalyst –which has been often been proposed to bind to both imine electrophile and indole nucleophile– might affect the indole C2/C3 partial charges resulting in the formation of the minor C2-regioisomer.

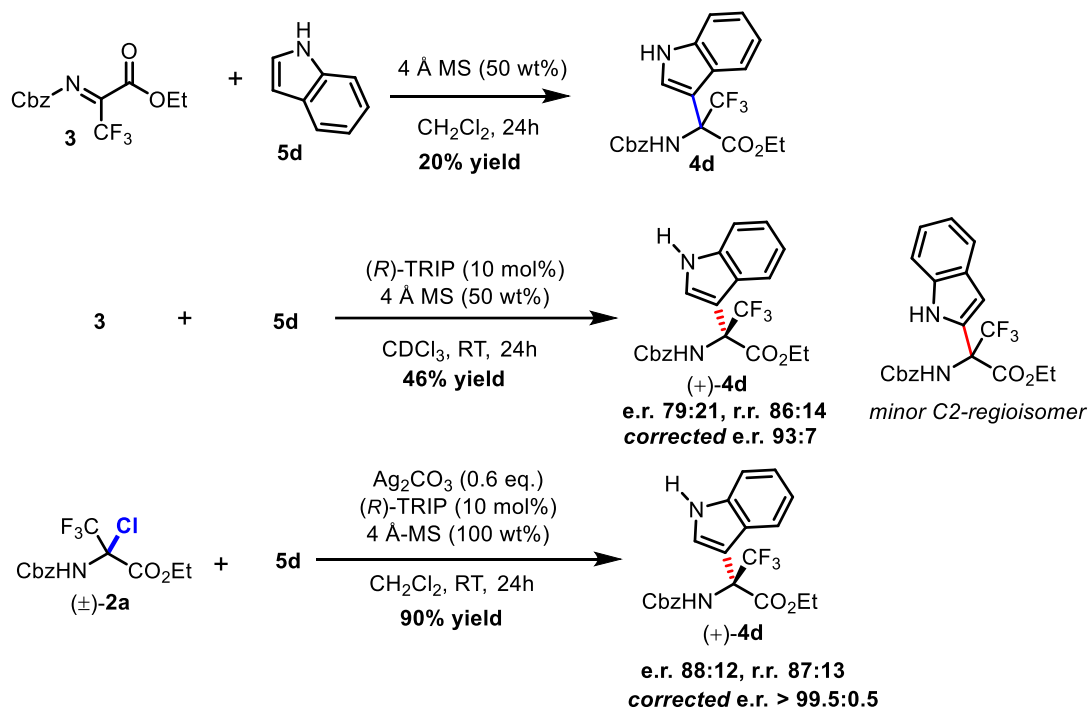

Synthesis of enantioenriched (+)-**4d** (Entry 6): Ag<sub>2</sub>CO<sub>3</sub> (16.5 mg, 0.06 mmol, 0.60 eq.), activated 4 Å molecular sieves (17.0 mg, 50 wt % rel. to chloroaminal **2a**) in a reaction tube were heated under vacuum with a heat gun. After the tube was cooled down under argon, it was charged with indole (23.5 mg, 0.2 mmol, 2.0 eq) and chloroaminal **2a** (34.0 mg, 0.10 mmol, 1.0 eq.) followed

by anhydrous toluene (0.5 mL). The mixture was stirred at room temperature for 24 hours. The crude solution was filtered through a pad of celite which was then washed using EtOAc. Solvent was removed under reduced pressure and the crude material was purified on silica plate by preparative thin-layer chromatography (*n*-hexane: ethyl acetate, 50:50) to give enantioenriched **4d** ( $[\alpha]_D^{21} = 19.8$  ( $c = 1.16$ ,  $\text{CHCl}_3$ ), 35.6 mg, 0.085 mmol, 85% yield). The chromatographically pure sample of **4d** was solubilized in isopropanol (1 mg/mL) and analyzed on NP-HPLC (CHIRALCEL OD-H, isocratic 10% IPA/ 90% hexanes, 1.0 mL/min, detection at 254 nm). Racemic sample, retention times:  $T_r = 7.061, 8.292$  mins (e.r. = 51:49). Enantioenriched sample, retention times:  $T_R = 6.929, 8.161$  mins (e.r. = 91:09).

1 mmol Scale experiment (Entry 9):  $\text{Ag}_2\text{CO}_3$  (165 mg, 0.6 mmol, 0.60 eq.), activated 4 Å molecular sieves (170 mg, 50 wt % rel. to chloroaminal **2a**) in a reaction flask were heated under vacuum with a heat gun. The reaction flask was cooled down under argon and it was charged with indole (235 mg, 2.0 mmol, 2.0 eq) and chloroaminal **2a** (340 mg, 1.0 mmol, 1.0 eq.) followed by anhydrous toluene (5 mL). The reaction mixture was stirred at room temperature for 24 hours. The crude solution was filtered through a pad of celite which was then washed using ethyl acetate (3 X 5 mL). Solvent was removed under reduced pressure, and the crude material was purified by silica gel column chromatography using ethyl acetate and cyclohexane (gradient elution from 0:100 to 30:70). The desired enantioenriched product **4d** was obtained as a white solid (294 mg, 0.70 mmol, 70% yield, e.r. = 88:12, r.r. = 87:13).

We noted that in all reactions catalyzed by (*R*)-TRIP, the C2-regioisomer was formed and contaminated the major reaction product (+)-**4d**. This isomer has not been observed in any uncatalyzed reactions and seems to be formed when a combination of (*R*)-TRIP and molecular sieves is used. In our hands, the C2-regioisomer could not be removed neither by silica gel chromatography nor by reverse-phase HPLC as it coelutes with the C3-regioisomer. As shown in the Table SI-5 below, C2/C3 regioisomer ratios (r.r.) determined by  $^{19}\text{F}$  NMR appear to be closely related to the e.r. values measured by chiral HPLC in each reaction.



**Table SI-5.** Application to an enantioselective catalytic aza-Friedel-Crafts transformation.<sup>a-g</sup>

The reaction scheme shows the conversion of (±)-2a and 5d to two regioisomers. (±)-2a is a chiral auxiliary with a trifluoromethyl group, a chlorine atom, a CbzHN group, and an ethyl ester group. 5d is a benzimidazole derivative. The reaction conditions are Ag<sub>2</sub>CO<sub>3</sub>, (R)-TRIP (10 mol%), 4 Å MS (x wt%), solvent, and room temperature. The products are the major C3-regioisomer and the minor C2-regioisomer, both with the auxiliary groups.

| Entry          | Ag <sup>+</sup> (I) eq. | 4 Å-MS (x wt%) | solvent                         | Yield (%) | e.r. <sup>b</sup> | r.r. <sup>c</sup> |
|----------------|-------------------------|----------------|---------------------------------|-----------|-------------------|-------------------|
| 1 <sup>d</sup> | 2.4                     | 300            | CH <sub>2</sub> Cl <sub>2</sub> | 87        | 49:51             | 100:0             |
| 2              | 2.4                     | 300            | CH <sub>2</sub> Cl <sub>2</sub> | 87        | 82:18             | 83:17             |
| 3              | 1.2                     | 300            | CH <sub>2</sub> Cl <sub>2</sub> | 75        | 80:20             | 77:23             |
| 4              | 1.2                     | 100            | CH <sub>2</sub> Cl <sub>2</sub> | 96        | 88:12             | 88:12             |
| 5              | 1.2                     | 300            | toluene                         | 97        | 88:12             | 87:13             |
| 6              | 1.2                     | 50             | toluene                         | 85        | 90:10             | 91:09             |
| 7 <sup>e</sup> | 1.2                     | 50             | toluene                         | 85        | 90:10             | 86:14             |
| 8 <sup>f</sup> | 1.2                     | 50             | toluene                         | 83        | 88:12             | 87:13             |
| 9 <sup>g</sup> | 1.2                     | 30             | toluene                         | 70        | 88:12             | 87:13             |

<sup>a</sup> Standard reactions carried out on 0.1-0.2 mmol scale of (±)-2a in various solvents (0.2 M) at rt for 24 h. <sup>b</sup> Determined by NP-HPLC on an enantiodiscriminating Chiralcel OD-H stationary phase. <sup>c</sup> The ratio of C2/C3 regioisomers was determined by integration of peaks area of <sup>19</sup>F NMR. <sup>d</sup> Reaction achieved without (R)-TRIP. <sup>e</sup> Reaction at -20 °C. <sup>f</sup> Reaction at -78 °C for 30 h. <sup>g</sup> Reaction scale-up with 1.0 mmol of (±)-2a and 5 mol% of (R)-TRIP catalyst.

Since the two regioisomers weren't separable through chromatography, crystallization experiments were carried out to separate them. A slow evaporation crystallization was successful in ethyl acetate and ethanol mixture. Separated mother liquor and solid were analyzed by NMR and chiral HPLC.

Product **4d** (Entry 6: 44.1 mg, 91:09 r.r., 90:10 e.r.) was purified by crystallization from a solution of ethyl acetate and ethanol (0.4 mL, 1:1). The solvent was slowly evaporated until solid precipitated out. The mother liquor (containing 24.6 mg of solute) and the precipitated solid (19.5 mg) were separated for NMR and HPLC analysis. Analytical results showed that the concentrated mother liquor contains the C3-regioisomer (+)-**4d** as enantiomeric pure (> 99% e.e.), and that the solid contains an increased ratio in C2-regioisomer (80:20 r.r., 78:22 e.r.). These results suggest that the initial reaction is highly enantioselective, but contaminated with the product **4d** C2-regioisomer, therefore enantiomeric ratio can be corrected based on r.r. measured by <sup>19</sup>F NMR.

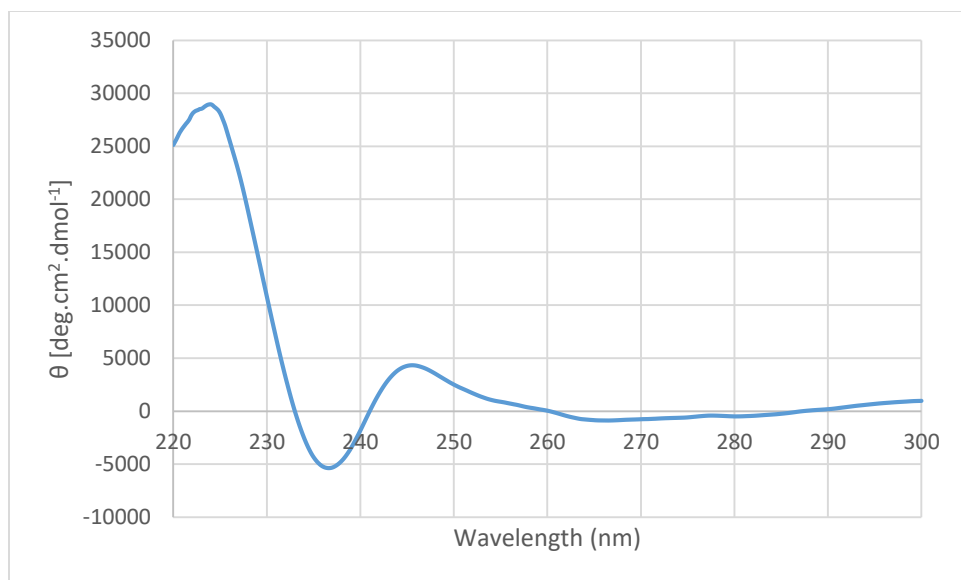

CD spectrum of enantioenriched (+)-**4d** (Entry 6).

The CD spectrum was recorded at room temperature using a solution of enantioenriched (+)-**4d** (>99% e.e., Entry 6) in CH<sub>3</sub>CN (1.08 x 10<sup>-3</sup> mol L<sup>-1</sup>) on a JASCO J-810 Spectropolarimeter (path length 0.1 cm). The CD spectrum of (+)-**4d** presented above is highly similar to the experimental ECD spectrum for (*R*) enantiomers predicted by Bolm and coworkers (*Org. Lett.* **2011**, *13*, 1044).<sup>[SI-4]</sup>

The chromatographically pure sample of ( $\pm$ )-**4d** (Entry 1) was solubilized in isopropanol (1 mg/mL) and analyzed on NP-HPLC (CHIRALCEL OD-H, isocratic 10% IPA/ 90% hexanes, 1.0 mL/min, detection at 254 nm). Retention times:  $T_r$  = 7.061, 8.292 mins (**e.r.** = **49:51**).

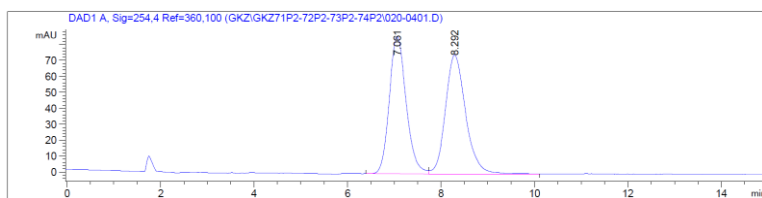

| Peak # | RetTime [min] | Type | Width [min] | Area [mAU*s] | Height [mAU] | Area %  |
|--------|---------------|------|-------------|--------------|--------------|---------|
| 1      | 7.061         | EV   | 0.3858      | 2156.96069   | 86.22986     | 49.0953 |
| 2      | 8.292         | VB   | 0.4599      | 2236.45459   | 74.57313     | 50.9047 |

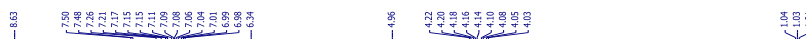

### $^1\text{H}$ NMR of Racemic sample ( $\pm$ )-**4d** (Entry 1)

gkz50p2n3.10.fid  
CDCl<sub>3</sub> (400 MHz)

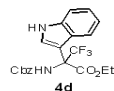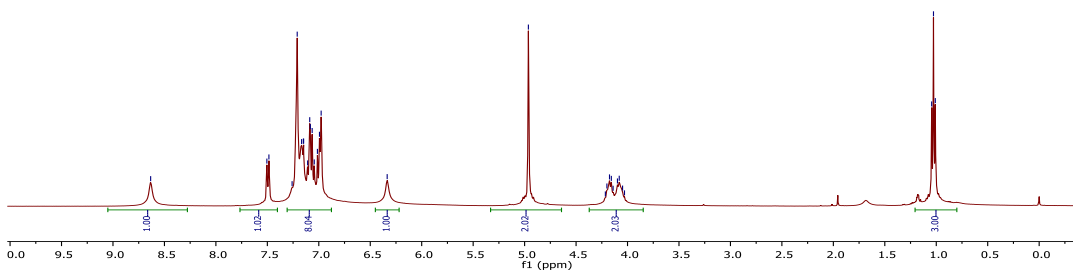

gkz50p2n3.11.fid  
CDCl<sub>3</sub> (376 MHz)

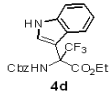

### $^{19}\text{F}$ NMR of Racemic sample ( $\pm$ )-**4d** (Entry 1)

---Single regioisomer---

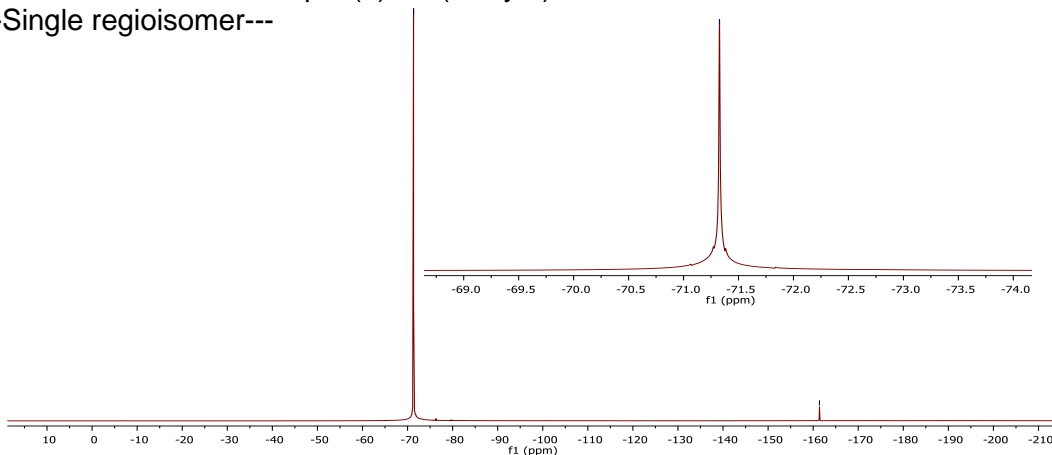

The chromatographically pure sample of (+)-**4d** (Entry 6) was solubilized in isopropanol (1 mg/mL) and analyzed by NP-HPLC (CHIRALCEL OD-H, isocratic 10% IPA/ 90% hexanes, 1.0 mL/min, detection at 254 nm). Retention times:  $T_R = 6.929, 8.161$  mins (**e.r. = 90:10**).

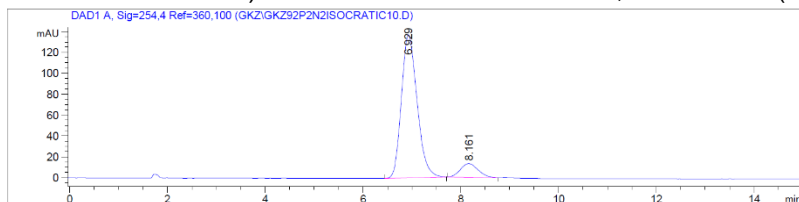

| Peak # | RetTime [min] | Type | Width [min] | Area [mAU*s] | Height [mAU] | Area %  |
|--------|---------------|------|-------------|--------------|--------------|---------|
| 1      | 6.929         | BB   | 0.3439      | 3054.63428   | 137.10504    | 90.3966 |
| 2      | 8.161         | BB   | 0.3882      | 324.51172    | 12.95807     | 9.6034  |

$^1\text{H}$  NMR of enantioenriched (+)-**4d** (Entry 6)

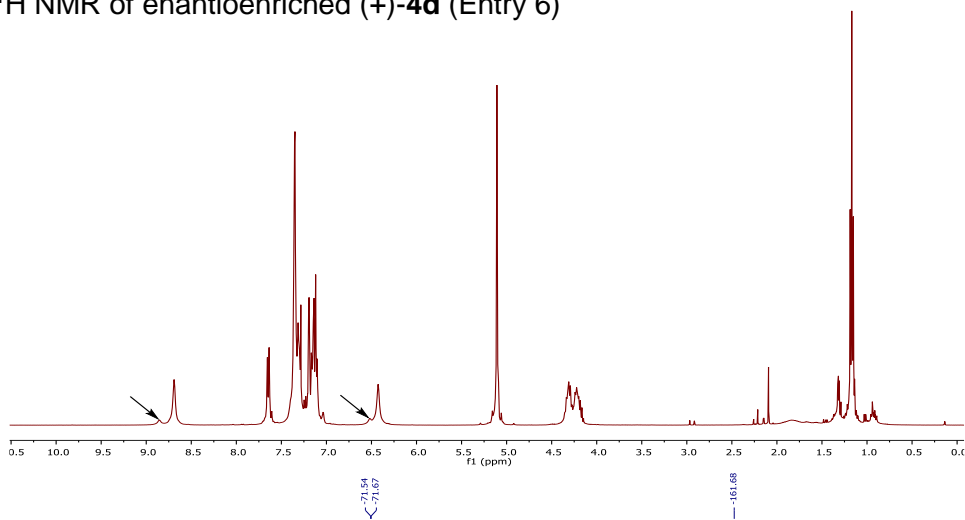

$^{19}\text{F}$  NMR of enantioenriched sample (+)-**4d** (Entry 6, **r.r. of 91:09**)

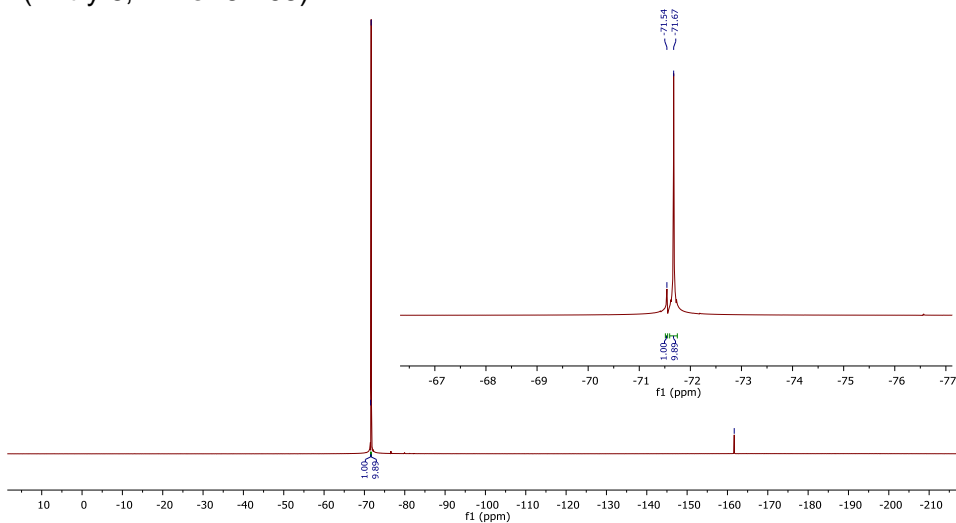

Sample of the concentrated mother liquor from the crystallization of **4d** was solubilized in isopropanol (1 mg/mL) and analyzed on NP-HPLC (CHIRALCEL OD-H, isocratic 10% IPA/ 90% hexanes, 1.0 mL/min, detection at 254 nm). Retention times:  $T_R = 6.932$  mins (e.r. >99.5:0.5).

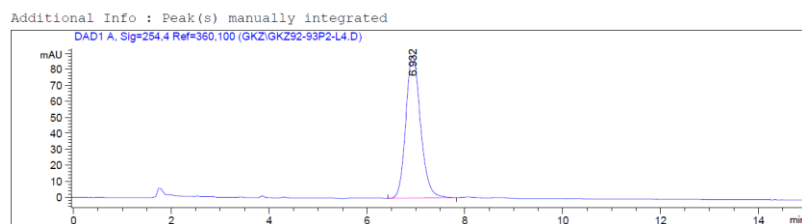

Signal 1: DAD1 A, Sig=254,4 Ref=360,100

| Peak # | RetTime [min] | Type | Width [min] | Area [mAU*s] | Height [mAU] | Area %   |
|--------|---------------|------|-------------|--------------|--------------|----------|
| 1      | 6.932         | BB   | 0.3238      | 1861.33679   | 89.05700     | 100.0000 |

Totals : 1861.33679 89.05700

### $^1\text{H}$ NMR of the concentrated mother liquor

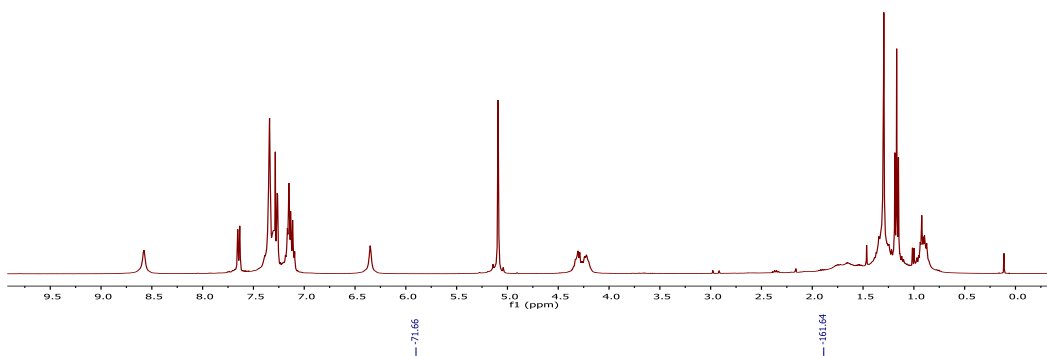

### $^{19}\text{F}$ NMR of the concentrated mother liquor (r.r. of 100:0)

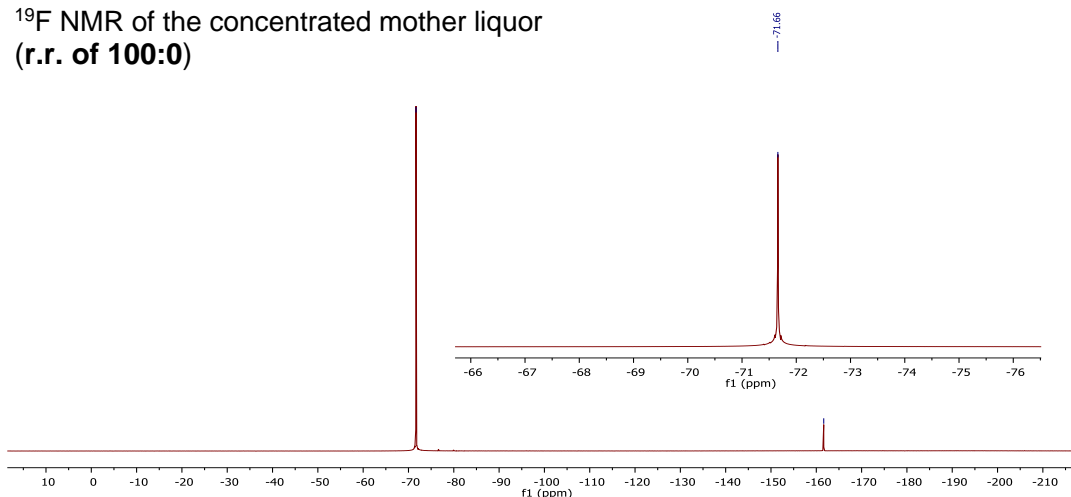

Sample of the precipitated solid from the crystallization of **4d** was solubilized in isopropanol (1 mg/mL) and analyzed on NP-HPLC (CHIRALCEL OD-H, isocratic 10% IPA/ 90% hexanes, 1.0 mL/min, detection at 254 nm). Retention times:  $T_r = 6.751, 7.892$  mins (**e.r. = 78:22**).

Additional Info : Peak(s) manually integrated

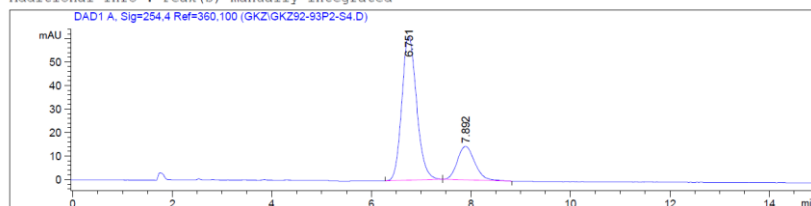

Signal 1: DAD1 A, Sig=254,4 Ref=360,100

| Peak # | RetTime [min] | Type | Width [min] | Area [mAU*s] | Height [mAU] | Area %  |
|--------|---------------|------|-------------|--------------|--------------|---------|
| 1      | 6.751         | BB   | 0.3185      | 1262.06140   | 61.21057     | 78.4419 |
| 2      | 7.892         | BB   | 0.3740      | 346.85107    | 14.24871     | 21.5581 |

Totals : 1608.91248 75.45928

### <sup>1</sup>H NMR of the precipitated solid

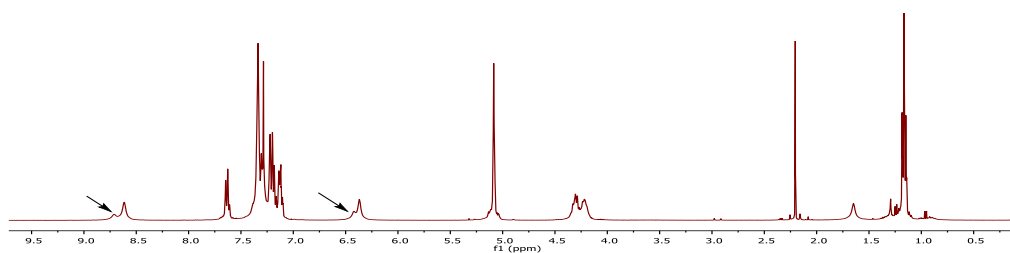

71.55  
71.63

61.64

71.55  
71.63

### <sup>19</sup>F NMR of the precipitated solid (r.r. of 80:20)

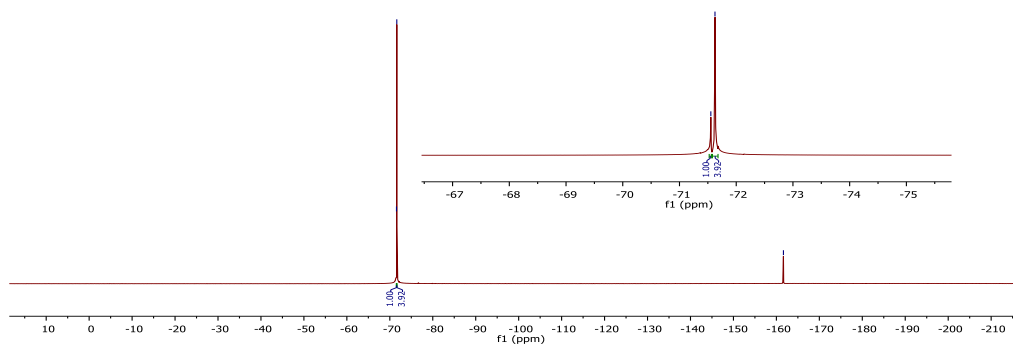

1.00  
3.32

1.00  
3.32

## IV. Synthetic Procedures and Compounds Characterization

### Ethyl 2-(((benzyloxy)carbonyl)amino)-2-chloro-3,3,3-trifluoropropanoate (**2a**)

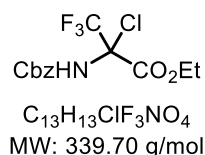

Synthesis of chloroaminal **2a**:  $SOCl_2$  (2.9 mL, 40 mmol, 2.0 eq.) was added neat and dropwise to a mixture of ethyl 3,3,3-trifluoropyruvate (3.4 mL, 26 mmol, 1.0 eq.) and benzyl carbamate (3.0 g, 20 mmol, 1.0 eq.). The reaction mixture was stirred neat at 60°C heated with oil bath in a sealed vessel for 3 days.  $SOCl_2$  was then evaporated and the residue washed with *n*-hexane (3 X 6.0 mL) to obtain the crude chloroaminal **2** as a white solid (6.1 g, 36.4 mmol, 91% yield). The product was used into the next step without further purification.  **$^1H$  NMR** (400 MHz,  $CDCl_3$ )  $\delta$  (ppm) = 7.44 – 7.30 (m, 5 $H_{Ph}$ ), 5.95 (br, NH), 5.17 (s, 2H, O- $\underline{CH}_2$ -Ph), 4.33 (q,  $J$  = 7.1 Hz, 2H, O- $\underline{CH}_2$ -CH<sub>3</sub>), 1.29 (t,  $J$  = 7.1 Hz, 3H, O- $\underline{CH}_2$ - $\underline{CH}_3$ ).  **$^{13}C$  NMR** (101 MHz,  $CDCl_3$ )  $\delta$  (ppm) = 161.1 (C-1), 153.2 (C(O)O- $\underline{CH}_2$ -Ph), 135.0 (*i*- $H_{Ph}$ ), 128.9 (*p*- $H_{Ph}$ ), 128.8 ( $H_{Ph}$ ), 128.8 ( $H_{Ph}$ ), 121.32 (q,  $J$  = 285.2 Hz,  $\underline{CF}_3$ ), 78.0 (q,  $J$  = 33.3 Hz, C- $\underline{CF}_3$ ), 68.6 (C(O)O- $\underline{CH}_2$ -Ph), 64.9 (O- $\underline{CH}_2$ -CH<sub>3</sub>), 13.7 (O- $\underline{CH}_2$ - $\underline{CH}_3$ ).  **$^{19}F$  NMR** (376 MHz,  $CDCl_3$ )  $\delta$  (ppm) = -76.26 (referred to -161.64 ppm of  $C_6F_6$ ). **IR** (film): 3315, 2987, 1742, 1523, 1266, 1237, 1194, 1063  $cm^{-1}$ . Note: The compound is not stable under infusion conditions and the hydrolyzed adduct mass was obtained. **HRMS** (ESI)  $m/z$ : [M-(Cl+OH)+H]<sup>+</sup> calcd. for  $C_{13}H_{15}F_3NO_5$  322.0897; Found 322.0919 (+6.8 ppm). **SMILES**: C1C(C(OCC)=O)(C(F)(F)F)NC(OCC1=CC=CC=C1)=O

### Ethyl 2-(((9*H*-fluoren-9-yl)methoxy)carbonyl)amino)-2-chloro-3,3,3-trifluoropropanoate (**2b**)

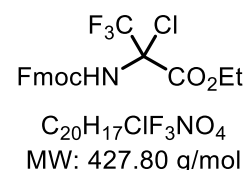

Synthesis of chloroaminal **2b**:  $SOCl_2$  (4.4 mL, 60 mmol, 3.0 eq.) was added neat and dropwise to a mixture of ethyl 3,3,3-trifluoropyruvate (3.4 mL, 26 mmol, 1.0 eq.) and (9*H*-fluoren-9-yl)methyl carbamate (4.8 g, 20 mmol, 1.0 eq.). The reaction mixture was stirred neat at 80 °C heated with oil bath in a sealed vessel for 36 hours.  $SOCl_2$  was then evaporated and the gummy residue was kept under vacuum for one day to obtain the crude chloroaminal **2b** as a white solid (8.5 g, 20 mmol, 100% yield). Product **2b** was used into the next step without further purification.  **$^1H$  NMR** (400 MHz,  $CDCl_3$ )  $\delta$  (ppm) = 7.81 (d,  $J$  = 7.5 Hz, 2H), 7.61 (dd,  $J$  = 7.5 Hz, 3.0 Hz, 2H), 7.46 (t,  $J$  = 7.5 Hz, 2H), 7.37 (t,  $J$  = 7.5 Hz, 2H), 6.24 (br, 1H), 4.63 – 4.49 (m, 2H), 4.41 (q,  $J$  = 7.1 Hz, 6.6 Hz, 2H), 4.27 (t,  $J$  = 6.7 Hz, 1H), 1.36 (t,  $J$  = 7.1 Hz, 3H).  **$^{13}C$  NMR** (101 MHz,  $CDCl_3$ )  $\delta$  (ppm) = 160.9 (Cq), 153.1 (Cq), 143.1 (Cq), 141.3 (Cq), 127.9 (2 CH), 127.1 (2 CH), 124.8 (2 CH), 121.1 (q,  $J$  = 285.8 Hz, Cq), 120.0 (2 CH), 77.8 (q,  $J$  = 34.3 Hz, Cq), 68.3 (CH<sub>2</sub>), 64.8 (CH<sub>2</sub>), 46.7 (CH), 13.6 (CH<sub>3</sub>).  **$^{19}F$  NMR** (376 MHz,  $CDCl_3$ )  $\delta$  (ppm) = -75.90 (referred to -161.64 ppm of  $C_6F_6$ ). **IR** (film): 3314, 2986, 1739, 1518, 1478, 1232, 1060  $cm^{-1}$ . Note: The compound is not stable and the exact mass of the corresponding methoxyaminal was obtained in presence of methanol. **HRMS** (ESI)  $m/z$ : [M+H]<sup>+</sup> calcd. for  $C_{21}H_{21}F_3NO_5$  424.1366; Found 424.1365 (-0.2 ppm).

**SMILES**: C1C(C(OCC)=O)(C(F)(F)F)NC(OCC1C(C=CC=C2)=C2C3=C1C=CC=C3)=O

Ethyl 2-(((benzyloxy)carbonyl)amino)-3,3,3-trifluoro-2-hydroxypropanoate (**1**) <sup>[SI-3]</sup>

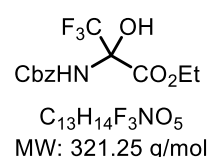

White solid, **m. p.** 116.8 – 117.0 °C. **R<sub>f</sub>** (*n*-hexane:CH<sub>2</sub>Cl<sub>2</sub>, 1:1) = 0.15. **<sup>1</sup>H NMR** (400 MHz, CDCl<sub>3</sub>) δ (ppm) = 7.67 – 7.26 (m, 5H), 6.04 (br, 1H), 5.39 (br, 1H), 5.13 (s, 2H), 4.62 – 4.17 (m, 2H), 1.30 (t, *J* = 8.0 Hz, 3H). **<sup>13</sup>C NMR** (101 MHz, CDCl<sub>3</sub>) δ (ppm) = 165.7 (Cq), 154.6 (Cq), 135.1 (Cq), 128.6 (2 CH), 128.5 (CH), 128.3 (2 CH), 121.4 (q, *J* = 288.8 Hz, Cq), 80.4 (q, *J* = 33.3 Hz, Cq), 67.9 (CH<sub>2</sub>), 64.6 (CH<sub>2</sub>), 13.7 (CH<sub>3</sub>). **<sup>19</sup>F NMR** (376 MHz, CDCl<sub>3</sub>) δ (ppm) = -80.63 (referred to -161.64 ppm of C<sub>6</sub>F<sub>6</sub>). **IR** (film): 3288, 1748, 1692, 1540, 1322, 1270, 1239, 1156 cm<sup>-1</sup>. **HRMS** (ESI) *m/z*: [M+H]<sup>+</sup> calcd. for C<sub>13</sub>H<sub>15</sub>F<sub>3</sub>NO<sub>5</sub> 322.0897; Found 322.0910 (+4.0 ppm).

**SMILES:** OC(C(OCC)=O)(C(F)(F)F)NC(OCC1=CC=CC=C1)=O

Ethyl (*Z*)-2-(((benzyloxy)carbonyl)imino)-3,3,3-trifluoropropanoate (**3**)

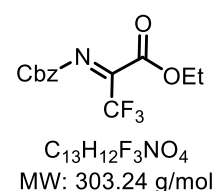

Synthesis of imine **3**: Ag<sub>2</sub>CO<sub>3</sub> (83 mg, 0.30 mmol, 1.5 eq.), activated 4 Å molecular sieves (300 wt % rel. to chloroaminal **2a**) in a reaction tube were heated under vacuum with a heat gun. After the tube was cooled down under argon, chloroaminal **2a** (68 mg, 0.20 mmol, 1.0 eq.) was added to the tube, then CDCl<sub>3</sub> (1 mL, dehydrated passing through aluminum oxide, neutral, 60 Å) was injected into the tube. The reaction was monitored by <sup>1</sup>H and <sup>19</sup>F NMR, and after 7-hour stirring, chloroaminal **2a** was fully transformed into imine **3** (60 mg, 0.20 mmol, 100% yield). Imine **3** is highly hygroscopic and unstable at room temperature. **<sup>1</sup>H NMR** (400 MHz, CDCl<sub>3</sub>) δ (ppm) = 7.43 – 7.37 (m, 5H), 5.34 (s, 2H), 4.32 (q, *J* = 8.0 Hz, 2H), 1.32 (t, *J* = 8.0 Hz, 3H). **<sup>13</sup>C NMR** (101 MHz, CDCl<sub>3</sub>) δ (ppm) = 158.5 (Cq), 139.2 (Cq), 136.7 (Cq), 134.2 (Cq), 128.9 (CH), 128.8 (2 CH), 128.7 (2 CH), 117.8 (q, *J* = 280.8 Hz, Cq), 69.6 (CH<sub>2</sub>), 64.3 (CH<sub>2</sub>), 13.7 (CH<sub>3</sub>). **<sup>19</sup>F NMR** (376 MHz, CDCl<sub>3</sub>) δ (ppm) = -70.05 (referred to -161.64 ppm of C<sub>6</sub>F<sub>6</sub>). **HRMS** (ESI) *m/z*: [M+NH<sub>4</sub>]<sup>+</sup> calcd. for C<sub>13</sub>H<sub>16</sub>F<sub>3</sub>N<sub>2</sub>O<sub>4</sub> 321.1062; Found 321.1051 (-3.4 ppm). Spectral data for compound **3** are consistent with the data previously reported in the literature. <sup>[SI-4]</sup>

**SMILES:** O=C(OCC)/C(C(F)(F)F)=N/C(OCC1=CC=CC=C1)=O

**General Protocol A: Friedel–Crafts Functionalization with Strongly Reactive π-Nucleophiles.**

All reactions were performed in flamed dry scintillation vials (2 mL) equipped with stir bars and placed under an inert atmosphere of argon. A vial was initially charged with chloroaminal **2** (0.20 mmol, 1.0 eq.) dissolved in anhydrous dichloromethane (1.0 mL, 0.20 M) before adding 4 Å MS (30 mg), silver carbonate (82 mg, 0.30 mmol, 1.5 eq.) and arene nucleophiles (0.40 mmol, 2.0 eq.). The resulting reaction mixture was stirred at RT. The progress of the reaction was monitored via <sup>1</sup>H, <sup>19</sup>F NMR, and TLC, until reaction completion (different reaction time in each case) as shown by the total disappearance of chloroaminal **2** by TLC (Note: the R<sub>f</sub> of **2** is actually the same as hemiaminal **1**, so moisture or water work-up can be misleading). The crude reaction mixture was then taken back in anhydrous dichloromethane (10 mL) and filtered over Celite® to remove residual silver salts and the filtrate was quenched with a sat. solution of NaHCO<sub>3</sub> (20 mL). The aqueous phase was extracted with dichloromethane (3 X 10 mL) and the combined organic layers



were dried over Na<sub>2</sub>SO<sub>4</sub> and evaporated *in vacuo*. The crude reaction mixture was finally purified by silica gel column chromatography under the appropriate eluent conditions.

Ethyl 2-(((benzyloxy)carbonyl)amino)-3,3,3-trifluoro-2-(1-methyl-1H-indol-3-yl)propanoate (**4c**)

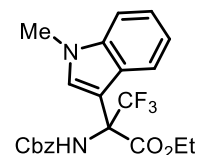

C<sub>22</sub>H<sub>21</sub>F<sub>3</sub>N<sub>2</sub>O<sub>4</sub>  
MW: 434.42 g/mol

18 hours at RT. The crude reaction mixture was purified by precipitation with ethyl acetate and petroleum ether. The mother liquor was then evaporated and purified by silica gel chromatography using an isocratic solvent system of *n*-hexane and ethyl acetate (85:15) to deliver **4c** as a white solid (58.2 mg, 0.134 mmol, 67% yield). **m. p.** 124.9 – 125.1 °C. **R<sub>f</sub>** (*n*-hexane:ethyl acetate, 85:15) = 0.38. **<sup>1</sup>H NMR** (400 MHz, CD<sub>3</sub>CN): δ (ppm) = 7.66 (d, *J* = 8.2 Hz, 1H), 7.46 – 7.40 (m, 2H), 7.39 – 7.31 (m, 5H), 7.25 (td, *J* = 8.0 Hz, 1.0 Hz, 1H), 7.12 (td, *J* = 8.0 Hz, 1.0 Hz, 1H), 6.81 (br, 1H), 5.13 (d, *J* = 12.4 Hz, 1H), 5.08 (d, *J* = 12.4 Hz, 1H), 4.23 – 4.03 (m, 2H), 3.79 (s, 3H), 1.10 (t, *J* = 7.1 Hz, 3H). **<sup>13</sup>C NMR** (101 MHz, CD<sub>3</sub>CN): δ (ppm) = 166.7, 155.6, 138.0, 130.2, 129.0, 126.1, 125.5 (q, *J* = 286.4 Hz), 123.1, 120.9, 118.3, 111.0, 106.0, 67.6, 65.8 (q, *J* = 29.5 Hz), 63.3, 33.5, 14.1. **<sup>19</sup>F NMR** (376 MHz, CDCl<sub>3</sub>) δ = -71.74. **IR** (film): 1732, 1549, 1525, 1435, 1404, 1372, 1339, 1258, 1228, 1184, 1069 cm<sup>-1</sup>. **HRMS** (ESI) *m/z*: [M+H]<sup>+</sup> calcd. for C<sub>22</sub>H<sub>22</sub>F<sub>3</sub>N<sub>2</sub>O<sub>4</sub> 435.1532; Found 435.1518 (-3.2 ppm).

**SMILES:** O=C(NC(C(OCC)=O)(C(F)(F)F)C1=CN(C)C=C1C=CC=C2)OCC3=CC=CC=C3

Ethyl 2-(((benzyloxy)carbonyl)amino)-3,3,3-trifluoro-2-(1H-indol-3-yl)propanoate (**4d**) <sup>[SI-5]</sup>

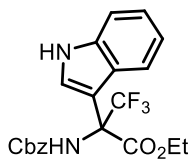

C<sub>21</sub>H<sub>19</sub>F<sub>3</sub>N<sub>2</sub>O<sub>4</sub>  
MW: 420.39 g/mol

24 hours at RT. Purified by preparative TLC (*n*-hexane: ethyl acetate, 50:50). White solid (73.0 mg, 0.174 mmol, 87% yield). **m. p.** 130.3 – 130.6 °C. **R<sub>f</sub>** (*n*-hexane: ethyl acetate, 85:15) = 0.33. **<sup>1</sup>H NMR** (400 MHz, CDCl<sub>3</sub>) δ (ppm) = 8.63 (br, 1H), 7.49 (d, *J* = 8.0 Hz, 1H), 7.31 – 6.88 (m, 8H), 6.34 (br, 1H), 4.96 (s, 2H), 4.23 – 4.02 (m, 2H), 1.03 (t, *J* = 8.0 Hz, 3H). **<sup>13</sup>C NMR** (101 MHz, CDCl<sub>3</sub>) δ (ppm) = 166.4 (Cq), 153.9 (Cq), 136.1 (Cq), 135.9 (Cq), 128.5 (2 CH), 128.1 (CH), 127.8 (2 CH), 124.8 (CH), 124.4 (Cq), 124.1 (q, *J* = 287.8 Hz, Cq), 122.4 (CH), 120.3 (CH), 119.0 (CH), 111.9 (CH), 105.7 (Cq), 67.1 (CH<sub>2</sub>), 65.2 (q, *J* = 30.3 Hz, Cq), 63.4 (CH<sub>2</sub>), 13.6 (CH<sub>3</sub>). **<sup>19</sup>F NMR** (376 MHz, CDCl<sub>3</sub>) δ (ppm) = -71.57 (referred to -161.64 ppm of C<sub>6</sub>F<sub>6</sub>). **IR** (film): 3393, 2963, 1729, 1496, 1460, 1255, 1187, 1025 cm<sup>-1</sup>. **HRMS** (ESI) *m/z*: [M+H]<sup>+</sup> calcd. for C<sub>21</sub>H<sub>20</sub>F<sub>3</sub>N<sub>2</sub>O<sub>4</sub>: 421.1375; Found 421.1400 (+5.9 ppm).

**SMILES:** O=C(OCC1=CC=CC=C1)NC(C2=CNC3=C2C=CC=C3)(C(F)(F)F)C(OCC)=O.

Ethyl 2-(((benzyloxy)carbonyl)amino)-3,3,3-trifluoro-2-(2-methyl-1H-indol-3-yl)propanoate (**4e**)

24 hours at RT. The crude material was purified by silica gel chromatography using *n*-hexane and ethyl acetate (gradient elution from 90:10 to 70:30) yielding **4e** as a white solid (60.8 mg, 0.14 mmol, 70% yield). **m. p.** 115.0 – 115.3 °C. **R<sub>f</sub>** (*n*-hexane: ethyl acetate, 70:30) = 0.36. **<sup>1</sup>H NMR** (400 MHz, CD<sub>3</sub>CN) δ (ppm) = 9.51 (br, 1H), 7.56 (d, *J* = 8.0 Hz, 1H), 7.44 – 7.28 (m, 6H), 7.19 – 7.07 (m, 2H), 6.55 (br, 1H), 5.18 (d, *J* = 12.5 Hz, 1H), 5.06 (d, *J* = 12.5 Hz, 1H), 4.31 – 4.20 (m, 2H), 2.40 (s, 3H), 1.13 (t, *J* = 7.2 Hz, 3H). **<sup>13</sup>C NMR** (101 MHz, CD<sub>3</sub>CN) δ (ppm) = 167.5, 155.9, 137.5, 136.0, 135.7, 129.4, 129.1, 128.8, 126.91, 126.1 (q, *J* = 287.3 Hz), 122.5, 121.2, 119.7, 112.1, 102.8, 67.9, 66.0 (q, *J* = 29.7 Hz), 63.4, 14.1, 13.4. **<sup>19</sup>F NMR** (376 MHz, CD<sub>3</sub>CN) δ (ppm) = -72.55. **IR** (film): 3300, 1746.9, 1691, 1536, 1498, 1456, 1456, 1407, 1374, 1320, 1271, 1233, 1202, 1180, 1134 cm<sup>-1</sup>. **HRMS** (ESI) *m/z*: [M+H]<sup>+</sup> calcd. for C<sub>22</sub>H<sub>22</sub>F<sub>3</sub>N<sub>2</sub>O<sub>4</sub> 435.1532; Found 435.1518 (-3.2 ppm).

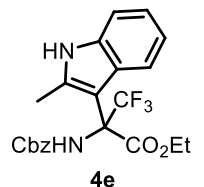

**4e**  
C<sub>22</sub>H<sub>21</sub>F<sub>3</sub>N<sub>2</sub>O<sub>4</sub>  
MW: 434.41 g/mol

**SMILES:** CC1=C(C(C(OCC)=O)(C(F)(F)F)NC(OCC2=CC=CC=C2)=O)C(C=CC=C3)=C3N1.

Ethyl 2-(((9H-fluoren-9-yl)methoxy)carbonyl)amino)-3,3,3-trifluoro-2-(2-methyl-1H-indol-3-yl)propanoate (**4f**)

24 hours at RT. Colorless oil (92.9 mg, 0.178 mmol, 89% yield). **R<sub>f</sub>** (*n*-hexane: ethyl acetate, 1:1) = 0.40. **<sup>1</sup>H NMR** (400 MHz, CDCl<sub>3</sub>) δ (ppm) = 8.23 (br, 1H), 7.78 (d, *J* = 7.6 Hz, 2H), 7.68 (d, *J* = 8.2 Hz, 1H), 7.58 (d, *J* = 8.2 Hz, 2H), 7.45 – 7.29 (m, 2H), 7.37 – 7.29 (m, 3H), 7.24 – 7.17 (m, 2H), 6.46 (br, 1H), 4.47 – 4.32 (m, 4H), 4.26 (t, *J* = 7.2 Hz, 1H), 2.42 (s, 3H), 1.25 (t, *J* = 7.2 Hz, 3H). **<sup>13</sup>C NMR** (101 MHz, CDCl<sub>3</sub>) δ (ppm) = 166.8 (Cq), 154.4 (Cq), 143.7 (Cq), 143.6 (Cq), 141.3 (2 Cq), 134.5 (Cq), 134.1 (Cq), 127.8 (CH), 127.7 (CH), 127.1 (2 CH), 126.3 (Cq), 125.1 (2 CH), 124.6 (q, *J* = 288.8 Hz, Cq), 122.0 (CH), 120.8 (CH), 120.0 (2 CH), 118.9 (CH), 118.8 (CH), 111.0 (CH), 103.0 (Cq), 67.7 (CH<sub>2</sub>), 65.2 (q, *J* = 30.3 Hz, Cq), 62.9 (CH<sub>2</sub>), 47.1 (CH), 13.8 (CH<sub>3</sub>), 13.3 (CH<sub>3</sub>). **<sup>19</sup>F NMR** (376 MHz, CDCl<sub>3</sub>) δ (ppm) = -71.58 (referred to -161.64 ppm of C<sub>6</sub>F<sub>6</sub>). **IR** (film): 3390, 2928, 1750, 1488, 1282, 1190, 1031 cm<sup>-1</sup>. **HRMS** (ESI) *m/z*: [M+H]<sup>+</sup> calcd. for C<sub>29</sub>H<sub>26</sub>F<sub>3</sub>N<sub>2</sub>O<sub>4</sub> 523.1839; Found 523.1837 (-0.3 ppm).

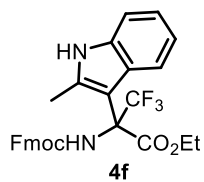

**4f**  
C<sub>29</sub>H<sub>25</sub>F<sub>3</sub>N<sub>2</sub>O<sub>4</sub>  
MW: 522.52 g/mol

**SMILES:** CC1=C(C(C(OCC)=O)(C(F)(F)F)NC(OCC2C(C=CC=C3)=C3C4=C2C=CC=C4)=O)C(C=CC=C5)=C5N1

When *N*-methyl pyrrole was used as nucleophile, two regioisomers **4g** and **4g'** formed (2:3 ratio) after 25 hours at RT, and were separated during purification by silica gel column chromatography using *n*-hexane and ethyl acetate (gradient elution from 95:15 to 70:30).

Ethyl 2-(((benzyloxy)carbonyl)amino)-3,3,3-trifluoro-2-(1-methyl-1H-pyrrol-2-yl)propanoate (**4g**)

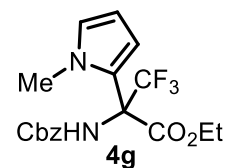

**4g**  
C<sub>18</sub>H<sub>19</sub>F<sub>3</sub>N<sub>2</sub>O<sub>4</sub>  
MW: 384.35 g/mol

Minor isomer, colorless oil (27.7 mg, 0.07 mmol, 36% yield). **R<sub>f</sub>** (*n*-hexane: ethyl acetate, 85:15) = 0.24. **<sup>1</sup>H NMR** (400 MHz, CDCl<sub>3</sub>) δ (ppm) = 7.36 – 7.26 (m, 5H), 6.61 – 6.57 (m, 1H), 6.47 – 6.42 (m, 1H), 6.22 (br, 1H), 6.15 (t, *J* = 3.2 Hz, 1H), 5.12 – 4.98 (m, 2H), 4.44 – 3.22 (m, 2H), 3.40 (s, 3H), 1.25 (t, *J* = 8.0 Hz, 3H). **<sup>13</sup>C NMR** (101 MHz, CD<sub>3</sub>CN) δ (ppm) = 165.2, 153.8, 136.6, 128.2, 126.2, 123.4 (q, *J* = 289.8 Hz), 121.1, 111.4, 106.8, 66.7, 64.8 (q, *J* = 30.5 Hz), 35.1, 13.1. **<sup>19</sup>F NMR** (376 MHz, CDCl<sub>3</sub>) δ (ppm) = -67.34. **IR** (film):

3405, 2926, 1756, 1738, 1497, 1455, 1417, 1369, 1259, 1238, 1221, 1170, 1098 cm<sup>-1</sup>. **HRMS** (ESI) m/z: [M+H]<sup>+</sup> calcd. for C<sub>18</sub>H<sub>20</sub>F<sub>3</sub>N<sub>2</sub>O<sub>4</sub> 385.1375; Found 385.1386 (+2.9 ppm).

**SMILES:** CN1C=CC=C1C(C(OCC)=O)(C(F)(F)F)NC(OCC2=CC=CC=C2)=O

Ethyl 2-(((benzyloxy)carbonyl)amino)-3,3,3-trifluoro-2-(1-methyl-1H-pyrrol-3-yl)propanoate (**4g'**)

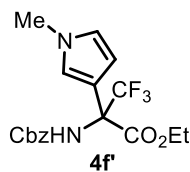

Major isomer, white solid (39.5 mg, 0.10 mmol, 51% yield). **m. p.** 99.6 – 99.9 °C.

**R<sub>f</sub>** (*n*-hexane:ethyl acetate, 85:15) = 0.10. **<sup>1</sup>H NMR** (400 MHz, CD<sub>3</sub>CN) δ (ppm) = 7.44 – 7.30 (m, 5H), 6.78 (t, *J* = 1.9 Hz, 1H), 6.63 (t, *J* = 2.6 Hz, 1H), 6.48 (br, 1H), 6.18 – 6.12 (m, 1H), 5.13 (d, *J* = 12.6 Hz, 1H), 5.07 (d, *J* = 12.6 Hz, 1H), 4.16 (q, *J* = 7.0 Hz, 2H), 3.61 (s, 3H), 1.15 (t, *J* = 7.0 Hz, 3H). **<sup>13</sup>C NMR** (101

MHz, CD<sub>3</sub>CN) δ (ppm) = 166.4 (Cq), 155.2 (Cq), 137.4 (Cq), 129.1 (2 CH), 128.7 (2 CH), 128.4 (CH), 125.0 (q, *J* = 289.8 Hz, Cq), 122.9 (CH), 121.8 (CH), 107.7 (CH), 104.9 (Cq), 67.2 (CH<sub>2</sub>), 64.5 (CH<sub>2</sub>), 36.3 (CH<sub>3</sub>), 13.7 (CH<sub>3</sub>). **<sup>19</sup>F NMR** (376 MHz, CDCl<sub>3</sub>) δ (ppm) = -73.33. **IR** (film): 3357, 2926, 1750, 1498, 1455, 1369, 1346, 1265, 1217, 1175, 1151, 1061 cm<sup>-1</sup>. **HRMS** (ESI) m/z: [M+H]<sup>+</sup> calcd. for C<sub>18</sub>H<sub>20</sub>F<sub>3</sub>N<sub>2</sub>O<sub>4</sub> 385.1375; Found 385.1381 (+1.6 ppm).

**SMILES:** CN1C=CC(C(C(OCC)=O)(C(F)(F)F)NC(OCC2=CC=CC=C2)=O)=C1

Ethyl 2-(((benzyloxy)carbonyl)amino)-3,3,3-trifluoro-2-(1H-pyrrol-2-yl)propanoate (**4h**)

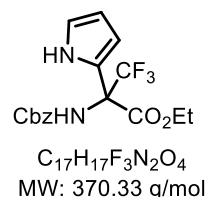

20 hours at RT. The crude material was purified by silica gel chromatography using an isocratic solvent system of *n*-hexane and ethyl acetate (85:15).

Colorless oil (52.6 mg, 0.14 mmol, 71% yield). **R<sub>f</sub>** (*n*-hexane: ethyl acetate, 85:15) = 0.20. **<sup>1</sup>H NMR** (400 MHz, CD<sub>3</sub>CN): δ (ppm) = 9.60 (br, 1H), 7.54 – 7.29 (m, 5H), 6.90 (br, 1H), 6.86 (td, *J* = 2.8 Hz, 1.6 Hz, 1H), 6.39 – 6.28 (m, 1H), 6.18 – 6.11 (m, 1H), 5.22 – 5.05 (m, 2H), 4.24 (q, *J* = 7.1 Hz, 2H), 1.20 (t, *J* =

7.1 Hz, 3H). **<sup>13</sup>C NMR** (100 MHz, CD<sub>3</sub>CN): δ (ppm) = 165.9, 155.8, 137.6, 129.5, 129.2, 128.8, 124.5 (q, *J* = 241.7 Hz), 121.9, 121.1, 110.3, 109.1, 65.31 (q, *J* = 29.1 Hz), 67.9, 63.8, 14.2. **<sup>19</sup>F NMR** (376 MHz, CD<sub>3</sub>CN) δ (ppm) = -73.33. **IR** (film): 3386, 1727, 1499, 1455, 1405, 1370, 1254, 1220, 1192, 1098 cm<sup>-1</sup>. **HRMS** (ESI) m/z: [M+H]<sup>+</sup> calcd. for C<sub>17</sub>H<sub>18</sub>F<sub>3</sub>N<sub>2</sub>O<sub>4</sub>, 371.1219; Found 371.1223 (+1.1 ppm).

**SMILES:** [H]N1C=CC(C(C(OCC)=O)(C(F)(F)F)NC(OCC2=CC=CC=C2)=O)=C1

Ethyl 2-(((benzyloxy)carbonyl)amino)-3,3,3-trifluoro-2-(5-methylfuran-2-yl)propanoate (**4i**)

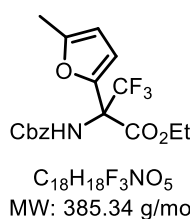

48 hours at RT. The crude material was purified by silica gel chromatography using an isocratic solvent system of *n*-hexane and ethyl acetate (90:10).

Colorless oil (56.2 mg, 0.15 mmol, 73% yield). **R<sub>f</sub>** (*n*-hexane: ethyl acetate, 85:15) = 0.32. **<sup>1</sup>H NMR** (400 MHz, CD<sub>3</sub>CN) δ (ppm) = 7.52 – 7.26 (m, 5H), 6.88 (br, 1H), 6.49 (d, *J* = 3.3 Hz, 1H), 6.09 (d, *J* = 3.3 Hz, 1H), 5.14 (d, *J* = 12.4 Hz, 1H), 5.08 (d, *J* = 12.4 Hz, 1H), 4.25 – 4.18 (m, 2H), 2.26 (s, 3H), 1.16 (t, *J* = 7.1

Hz, 3H). **<sup>13</sup>C NMR** (101 MHz, CD<sub>3</sub>CN) δ (ppm) = 164.2 (Cq), 155.0 (Cq), 154.5 (Cq), 142.8 (Cq), 137.1 (Cq), 129.1 (2 CH), 128.7 (2 CH), 128.5 (CH), 123.9 (q, *J* = 287.8 Hz, Cq), 112.3 (CH), 107.6 (CH), 67.5 (CH<sub>2</sub>), 65.0 (q, *J* = 30.3 Hz, Cq), 63.4 (CH<sub>2</sub>), 13.7 (CH<sub>3</sub>), 13.1 (CH<sub>3</sub>). **<sup>19</sup>F NMR** (376 MHz, CDCl<sub>3</sub>) δ (ppm) = -73.18 (referred to -161.64 ppm of C<sub>6</sub>F<sub>6</sub>). **IR** (film): 3291, 1755, 1735,

1508, 1457, 1384, 1369, 1296, 1242, 1190, 1154, 1061  $\text{cm}^{-1}$ . **HRMS** (ESI)  $m/z$ :  $[M+H]^+$  calcd. for  $\text{C}_{18}\text{H}_{19}\text{F}_3\text{NO}_5$  386.1215; Found 386.1212 (+0.8 ppm).

**SMILES**: CC(O1)=CC=C1C(C(OCC)=O)(C(F)(F)F)NC(OCC2=CC=CC=C2)=O.

Ethyl 2-(((benzyloxy)carbonyl)amino)-3,3,3-trifluoro-2-(5-methoxyfuran-2-yl)propanoate (**4j**)

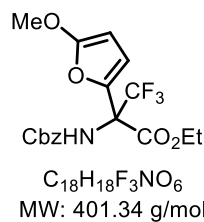

72 hours at RT. The crude material was purified by silica gel chromatography using *n*-hexane and DCM (gradient elution from 55:45 to 40:60) yielding **4i** as a colorless oil (45.0 mg, 0.11 mmol, 56% yield).  $R_f$  (*n*-hexane: $\text{CH}_2\text{Cl}_2$ , 1:1) = 0.22.  **$^1\text{H NMR}$**  (400 MHz,  $\text{CD}_3\text{CN}$ )  $\delta$  (ppm) = 7.34 (m, 5H), 6.84 (br, 1H), 6.52 (d,  $J$  = 3.5 Hz, 1H), 5.30 (d,  $J$  = 3.5 Hz, 1H), 5.13 (d,  $J$  = 12.4 Hz, 1H), 5.08 (d,  $J$  = 12.4 Hz, 1H), 4.22 (q,  $J$  = 7.2 Hz, 2H), 3.84 (s, 3H), 1.17 (t,  $J$  = 7.2 Hz, 3H).

**$^{13}\text{C NMR}$**  (101 MHz,  $\text{CD}_3\text{CN}$ )  $\delta$  (ppm) = 164.4, 163.2, 155.4, 137.5, 134.5, 129.5, 129.1, 128.8, 124.2 (q,  $J$  = 286.7 Hz), 118.3, 113.9, 81.7, 67.8, 65.1 (q,  $J$  = 28.9 Hz), 63.8, 58.9, 14.0.  **$^{19}\text{F NMR}$**  (376 MHz,  $\text{CDCl}_3$ )  $\delta$  (ppm) = -73.09. **IR** (film): 1737, 1616, 1574, 1500, 1455, 1439, 1734, 1257, 1193, 1163, 1066  $\text{cm}^{-1}$ . **HRMS** (ESI):  $m/z$   $[M+H]^+$  calcd. for  $\text{C}_{18}\text{H}_{19}\text{F}_3\text{NO}_6$  402.1164; Found 402.1174 (+2.5 ppm).

**SMILES**: O=C(OCC1=CC=CC=C1)NC(C(OCC)=O)(C(F)(F)F)C2=CC=C(OC)O2.

## General Protocol B: Friedel–Crafts Functionalization with Weak $\pi$ -Nucleophiles

$\text{AgOTf}$  (103 mg, 0.40 mmol, 2.0 eq.) and activated 4 Å molecular sieves (300 wt % rel. to chloroaminal **2a**) in a reaction tube were heated under vacuum with a heat gun. After the tube was cooled down under argon, the appropriate arene nucleophile (0.40 mmol, 2.0 eq.) and chloroaminal **2a** (68 mg, 0.20 mmol, 1.0 eq.) were successively added followed by  $\text{CH}_2\text{Cl}_2$  (1 mL). The reaction mixture was stirred at the room temperature for 3 hours, then the crude solution was filtered through a pad of celite and washed using EtOAc. Solvent was removed under reduced pressure and the crude material was purified on silica plate by preparative thin-layer chromatography (*n*-hexane: ethyl acetate).

Ethyl 2-(((benzyloxy)carbonyl)amino)-3,3,3-trifluoro-2-(furan-2-yl)propanoate (**4a**)

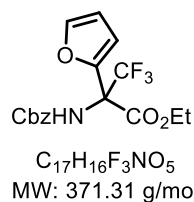

Colorless oil (53.2 mg, 0.14 mmol, 72% yield).  $R_f$  (*n*-hexane: $\text{CH}_2\text{Cl}_2$ , 1:1) = 0.17.

**$^1\text{H NMR}$**  (400 MHz,  $\text{CDCl}_3$ )  $\delta$  (ppm) = 7.46 – 7.30 (m, 6H), 6.58 (d,  $J$  = 3.2 Hz, 1H), 6.44 (dd,  $J$  = 3.2 Hz, 3.2 Hz, 1H), 6.14 (br, 1H), 5.15 (d,  $J$  = 12.4 Hz, 1H), 5.08 (d,  $J$  = 12.4 Hz, 1H), 4.44 – 4.22 (m, 2H), 1.23 (t,  $J$  = 8.0 Hz, 3H).  **$^{13}\text{C NMR}$**

(101 MHz,  $\text{CDCl}_3$ )  $\delta$  (ppm) = 163.8 (Cq), 153.7 (Cq), 143.9 (Cq), 143.2 (CH), 135.6 (Cq), 128.5 (2 CH), 128.3 (CH), 128.2 (2 CH), 122.8 (q,  $J$  = 287.8 Hz, Cq), 111.1 (CH), 110.7 (CH), 67.5 ( $\text{CH}_2$ ), 64.3 (q,  $J$  = 30.3 Hz, Cq), 63.5 ( $\text{CH}_2$ ), 13.6 ( $\text{CH}_3$ ).  **$^{19}\text{F NMR}$**  (376 MHz,  $\text{CDCl}_3$ )  $\delta$  (ppm) = -73.04 (referred to -161.64 ppm of  $\text{C}_6\text{F}_6$ ). **IR** (film): 3352, 2985, 1739, 1495, 1253, 1167, 1021  $\text{cm}^{-1}$ . **HRMS** (ESI):  $m/z$   $[M+H]^+$  calcd. for  $\text{C}_{17}\text{H}_{17}\text{F}_3\text{NO}_5$  372.1059; Found 372.1050 (-2.5 ppm).

**SMILES**: O=C(OCC1=CC=CC=C1)NC(C(OCC)=O)(C(F)(F)F)C2=CC=CO2.

Ethyl 2-(((benzyloxy)carbonyl)amino)-3,3,3-trifluoro-2-(5-methylthiophen-2-yl)propanoate (**4k**)

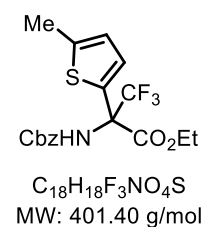

Colorless oil (65.8 mg, 0.16 mmol, 82% yield).  $R_f$  (*n*-hexane:CH<sub>2</sub>Cl<sub>2</sub>, 1:1) = 0.17. <sup>1</sup>H NMR (400 MHz, CDCl<sub>3</sub>) δ (ppm) = 7.40 – 7.30 (m, 5H), 7.08 (d, *J* = 3.6 Hz, 1H), 6.70 (dd, *J* = 3.6 Hz, 1.0 Hz, 1H), 5.86 (br, 1H), 5.13 (s, 2H), 4.37 – 4.23 (m, 2H), 2.47 (s, 3H), 1.25 (t, *J* = 7.2 Hz, 3H). <sup>13</sup>C NMR (101 MHz, CDCl<sub>3</sub>) δ (ppm) = 164.6 (Cq), 153.9 (Cq), 141.9 (Cq), 135.6 (Cq), 131.5 (Cq), 128.5 (2 CH), 128.3 (CH), 128.2 (3 CH), 125.1 (CH), 123.1 (q, *J* = 287.8 Hz, Cq), 67.5 (CH<sub>2</sub>), 66.0 (q, *J* = 30.3 Hz, Cq), 63.3 (CH<sub>2</sub>), 15.0 (CH<sub>3</sub>), 13.6 (CH<sub>3</sub>). <sup>19</sup>F NMR (376 MHz, CDCl<sub>3</sub>) δ (ppm) = -72.81 (referred to -161.64 ppm of C<sub>6</sub>F<sub>6</sub>). IR (film): 3349, 2983, 1739, 1497, 1220, 1173, 1025 cm<sup>-1</sup>. HRMS (ESI): *m/z* [M+H]<sup>+</sup> calcd. for C<sub>18</sub>H<sub>19</sub>F<sub>3</sub>NO<sub>4</sub>S 402.0987; Found 402.0981 (+1.7 ppm). SMILES: CC(S1)=CC=C1C(C(OCC)=O)(C(F)(F)F)NC(OCC2=CC=CC=C2)=O.

Ethyl 2-(((benzyloxy)carbonyl)amino)-2-(2,5-dimethoxyphenyl)-3,3,3-trifluoropropanoate (**4l**)

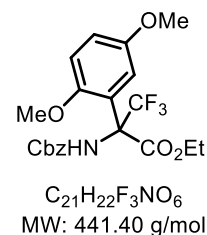

White solid, m. p. 111.1 – 111.3 °C (74.1 mg, 0.17 mmol, 84% yield).  $R_f$  (*n*-hexane:CH<sub>2</sub>Cl<sub>2</sub>, 1:1) = 0.10. <sup>1</sup>H NMR (400 MHz, CDCl<sub>3</sub>) δ (ppm) = 7.50 – 7.25 (m, 5H), 7.25 – 7.00 (m, 2H), 6.97 – 6.76 (m, 2H), 5.07 – 4.95 (m, 2H), 4.28 (q, *J* = 8.0 Hz, 2H), 3.76 (s, 3H), 3.72 (s, 3H), 1.19 (t, *J* = 8.0 Hz, 3H). <sup>13</sup>C NMR (101 MHz, CDCl<sub>3</sub>) δ (ppm) = 166.5 (Cq), 153.7 (Cq), 153.2 (Cq), 151.0 (Cq), 136.2 (Cq), 128.4 (2 CH), 128.1 (3 CH), 123.8 (q, *J* = 279.8 Hz, Cq), 121.4 (Cq), 116.6 (CH), 114.9 (CH), 112.7 (CH), 66.8 (CH<sub>2</sub>), 66.5 (q, *J* = 28.3 Hz, Cq), 63.2 (CH<sub>2</sub>), 56.2 (CH<sub>3</sub>), 55.6 (CH<sub>3</sub>), 13.7 (CH<sub>3</sub>). <sup>19</sup>F NMR (376 MHz, CDCl<sub>3</sub>) δ (ppm) = -71.41 (referred to -161.64 ppm of C<sub>6</sub>F<sub>6</sub>). IR (film): 3388, 2837, 1742, 1488, 1465, 1234, 1184, 1026 cm<sup>-1</sup>. HRMS (ESI): *m/z* [M+H]<sup>+</sup> calcd. for C<sub>21</sub>H<sub>23</sub>F<sub>3</sub>NO<sub>6</sub> 442.1477; Found 442.1462 (-3.4 ppm).

SMILES: O=C(OCC1=CC=CC=C1)NC(C2=CC(OC)=CC=C2OC)(C(F)(F)F)C(OCC)=O.

Ethyl 2-(((benzyloxy)carbonyl)amino)-3,3,3-trifluoro-2-(2,4,5-trimethoxyphenyl)propanoate (**4m**)

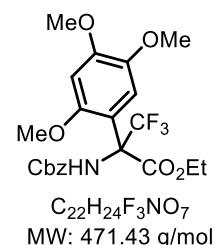

Colorless oil (66.9 mg, 0.14 mmol, 71% yield).  $R_f$  (*n*-hexane:CH<sub>2</sub>Cl<sub>2</sub>, 1:1) = 0.20. <sup>1</sup>H NMR (400 MHz, CDCl<sub>3</sub>) δ (ppm) = 7.40 – 7.20 (m, 6H), 6.93 (br, 1H), 6.49 (s, 1H), 5.16 – 4.92 (m, 2H), 4.40 – 4.14 (m, 2H), 3.89 (s, 3H), 3.80 (s, 3H), 3.75 (s, 3H), 1.20 (t, *J* = 8.0 Hz, 3H). <sup>13</sup>C NMR (101 MHz, CDCl<sub>3</sub>) δ (ppm) = 166.7 (Cq), 153.7 (Cq), 151.6 (Cq), 150.5 (Cq), 142.7 (Cq), 136.1 (Cq), 128.3 (2 CH), 128.0 (3 CH), 123.9 (q, *J* = 289.9 Hz, Cq), 113.7 (CH), 111.5 (Cq), 97.8 (CH), 66.8 (CH<sub>2</sub>), 66.5 (q, *J* = 29.3 Hz, Cq), 63.0 (CH<sub>2</sub>), 56.6 (CH<sub>3</sub>), 56.4 (CH<sub>3</sub>), 55.8 (CH<sub>3</sub>), 13.7 (CH<sub>3</sub>). <sup>19</sup>F NMR (376 MHz, CDCl<sub>3</sub>) δ (ppm) = -71.76 (referred to -161.64 ppm of C<sub>6</sub>F<sub>6</sub>). IR (film): 3389, 2939, 1740, 1615, 1494, 1454, 1393, 1217, 1121, 1000 cm<sup>-1</sup>. HRMS (ESI): *m/z* [M+Na]<sup>+</sup> calcd. for C<sub>22</sub>H<sub>24</sub>F<sub>3</sub>NO<sub>7</sub>Na 494.1403; Found 494.1392 (-2.2 ppm).

SMILES: O=C(OCC1=CC=CC=C1)NC(C2=CC(OC)=C(OC)C=C2OC)(C(F)(F)F)C(OCC)=O.

Ethyl 2-(((benzyloxy)carbonyl)amino)-2-(2,4-dimethoxyphenyl)-3,3,3-trifluoropropanoate (**4b**)

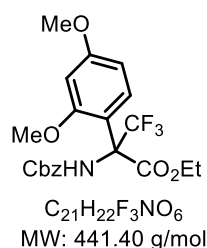

Colorless oil (63.2 mg, 0.14 mmol, 72%).  $R_f$  (*n*-hexane:CH<sub>2</sub>Cl<sub>2</sub>, 7:3) = 0.19. <sup>1</sup>H NMR (400 MHz, CDCl<sub>3</sub>) δ (ppm) = 7.50 – 7.21 (m, 6H), 6.94 (br, 1H), 6.53 (d, *J* = 4.0 Hz, 1H), 6.44 (d, *J* = 4.0 Hz, 1H), 5.15 – 4.85 (m, 2H), 4.31 – 4.23 (m, 2H), 3.82 (s, 3H), 3.72 (s, 3H), 1.20 (t, *J* = 8.0 Hz, 3H). <sup>13</sup>C NMR (101 MHz, CDCl<sub>3</sub>) δ (ppm) = 167.0 (Cq), 161.3 (Cq), 157.8 (Cq), 153.6 (Cq), 136.2 (Cq), 130.9 (CH), 130.8 (CH), 128.4 (CH), 128.1 (2 CH), 128.0 (CH), 124.0 (q, *J* = 289.9 Hz, Cq), 113.0 (Cq), 104.3 (CH), 99.3 (CH), 66.7 (CH<sub>2</sub>), 66.3 (q, *J* = 28.3 Hz, Cq), 63.2 (CH<sub>2</sub>), 55.6 (CH<sub>3</sub>), 55.3 (CH<sub>3</sub>), 13.7 (CH<sub>3</sub>). <sup>19</sup>F NMR (376 MHz, CDCl<sub>3</sub>) δ (ppm) = -71.20 (referred to -161.64 ppm of C<sub>6</sub>F<sub>6</sub>). IR (film): 3400, 2942, 2842, 1742, 1615, 1496, 1305, 1243, 1211, 1027 cm<sup>-1</sup>. HRMS (ESI): *m/z* [M+Na]<sup>+</sup> calcd. for C<sub>21</sub>H<sub>22</sub>F<sub>3</sub>NO<sub>6</sub>Na 464.1297; Found 464.1283 (-3.0 ppm).

**SMILES:** O=C(OCC=CC=CC=C1)NC(C2=CC=C(OC)C=C2OC)(C(F)(F)F)C(OCC)=O.

When 1,3-dimethoxy-5-methylbenzene was used as nucleophile, regioisomers **4n** and **4n'** formed (5:1 ratio) and were separated by preparative thin-layer chromatography. The <sup>1</sup>H NMR and <sup>19</sup>F spectra of compound **4n'** (13.8 mg, 0.03 mmol, 15% yield) are presented in the following section without further analysis.

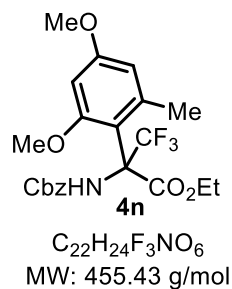

Ethyl 2-(((benzyloxy)carbonyl)amino)-2-(2,4-dimethoxy-6-methylphenyl)-3,3,3-trifluoropropanoate (**4n**): Major isomer; Colorless oil (67.4 mg, 0.15 mmol, 74% yield).  $R_f$  (*n*-hexane:CH<sub>2</sub>Cl<sub>2</sub>, 1:1) = 0.12. <sup>1</sup>H NMR (400 MHz, CDCl<sub>3</sub>) δ (ppm) = 7.92 (br, 1H), 7.39 – 7.13 (m, 5H), 6.31 (s, 1H), 6.30 (s, 1H), 5.06 (d, *J* = 12.4 Hz, 1H), 4.95 (d, *J* = 12.4 Hz, 1H), 4.26 – 4.16 (m, 2H), 3.73 (s, 3H), 3.71 (s, 3H), 2.33 (s, 3H), 1.15 (t, *J* = 8.0 Hz, 3H). <sup>13</sup>C NMR (101 MHz, CDCl<sub>3</sub>) δ (ppm) = 166.9 (Cq), 160.1 (Cq), 160.0 (Cq), 154.1 (Cq), 140.9 (Cq), 136.3 (Cq), 128.4 (2 CH), 128.1 (CH), 128.0 (CH), 124.6 (q, *J* = 288.8 Hz, Cq), 112.9 (Cq), 110.8 (CH), 98.5 (CH), 67.1 (q, *J* = 29.3 Hz, Cq), 66.9 (CH<sub>2</sub>), 62.6 (CH<sub>2</sub>), 56.4 (CH<sub>3</sub>), 55.1 (CH<sub>3</sub>), 22.4 (CH<sub>3</sub>), 13.6 (CH<sub>3</sub>). <sup>19</sup>F NMR (376 MHz, CDCl<sub>3</sub>) δ (ppm) = -73.19 (referred to -161.64 ppm of C<sub>6</sub>F<sub>6</sub>). IR (film): 3369, 2943, 1763, 1741, 1607, 1498, 1454, 1322, 1228, 1202, 1034 cm<sup>-1</sup>. HRMS (ESI): *m/z* [M+Na]<sup>+</sup> calcd. for C<sub>22</sub>H<sub>24</sub>F<sub>3</sub>NO<sub>6</sub>Na 478.1453; Found 478.1440 (-2.7 ppm).

**SMILES:**

CC1=C(C(C(OCC)=O)(C(F)(F)F)NC(OCC2=CC=CC=C2)=O)C(OC)=CC(OC)=C1.

Ethyl 2-(((benzyloxy)carbonyl)amino)-3,3,3-trifluoro-2-(4-methoxyphenyl)propanoate (**4o**)

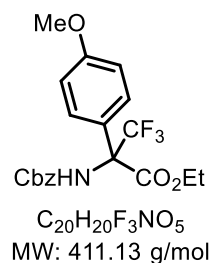

Colorless oil (68.4 mg, 0.17 mmol, 83% yield).  $R_f$  (*n*-hexane:CH<sub>2</sub>Cl<sub>2</sub>, 1:1) = 0.15. <sup>1</sup>H NMR (400 MHz, CDCl<sub>3</sub>) δ (ppm) = 7.71 – 7.10 (m, 7H), 6.91 (d, *J* = 8.0 Hz, 2H), 5.95 (br, 1H), 5.15 – 5.04 (m, 2H), 4.54 – 4.07 (m, 2H), 3.81 (s, 3H), 1.20 (t, *J* = 8.0 Hz, 3H). <sup>13</sup>C NMR (101 MHz, CDCl<sub>3</sub>) δ (ppm) = 166.1 (Cq), 160.1 (Cq), 154.1 (Cq), 135.7 (Cq), 128.5 (2 CH), 128.3 (CH), 128.2 (2 CH), 128.1 (CH), 128.0 (CH), 124.3 (Cq), 123.7 (q, *J* = 287.8 Hz, Cq), 114.1 (2 CH), 67.5 (q, *J* = 28.3 Hz, Cq), 67.4 (CH<sub>2</sub>), 63.1 (CH<sub>2</sub>), 55.3 (CH<sub>3</sub>), 13.7 (CH<sub>3</sub>). <sup>19</sup>F NMR (376 MHz, CDCl<sub>3</sub>) δ (ppm) = -71.17 (referred to -161.64 ppm of C<sub>6</sub>F<sub>6</sub>). IR (film): 2982, 1750, 1497,

1253, 1178, 1152, 1027  $\text{cm}^{-1}$ . **HRMS** (ESI):  $m/z$   $[M+Na]^+$  calcd. for  $\text{C}_{20}\text{H}_{20}\text{F}_3\text{NO}_5\text{Na}$  434.1191; Found 434.1177 (-3.2 ppm).

**SMILES:** O=C(OCC1=CC=CC=C1)NC(C2=CC=C(OC)C=C2)(C(F)(F)F)C(OCC)=O.

Ethyl 2-(((benzyloxy)carbonyl)amino)-3,3,3-trifluoro-2-(2-methoxynaphthalen-1-yl)propanoate (**4p**) Colorless oil (65.7 mg, 0.14 mmol, 72% yield).  $R_f$  (*n*-hexane: $\text{CH}_2\text{Cl}_2$ , 1:1) = 0.10.  **$^1\text{H}$  NMR**

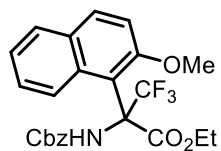

(400 MHz,  $\text{CDCl}_3$ )  $\delta$  (ppm) = 8.26 (d,  $J$  = 8.0 Hz, 1H), 7.90 (d,  $J$  = 8.0 Hz, 1H), 7.80 (d,  $J$  = 8.0 Hz, 1H), 7.51 – 7.44 (m, 1H), 7.41 – 7.27 (m, 7H), 5.12 (d,  $J$  = 12.3 Hz, 1H), 5.02 (d,  $J$  = 12.3 Hz, 1H), 4.27 – 4.17 (m, 2H), 3.96 (s, 3H), 1.08 (t,  $J$  = 7.1 Hz, 3H).  **$^{13}\text{C}$  NMR** (101 MHz,  $\text{CDCl}_3$ )  $\delta$  (ppm) = 167.3 (Cq), 157.0 (Cq), 154.2 (Cq), 136.0 (Cq), 132.9 (CH), 132.3 (Cq), 130.1 (Cq), 129.4 (CH), 128.4 (2 CH), 128.2 (2 CH), 128.1 (CH), 127.5 (CH), 124.6 (q,  $J$  = 288.9 Hz, Cq), 123.9 (CH), 123.6 (CH), 115.0 (CH), 114.4 (Cq), 67.4 (q,  $J$  = 30.3 Hz, Cq), 67.1 ( $\text{CH}_2$ ), 62.7 ( $\text{CH}_2$ ), 57.4 ( $\text{CH}_3$ ), 13.6 ( $\text{CH}_3$ ).  **$^{19}\text{F}$  NMR** (376 MHz,  $\text{CDCl}_3$ )  $\delta$  (ppm) = -71.51 (referred to -161.64 ppm of  $\text{C}_6\text{F}_6$ ). **IR** (film): 3368, 1759, 1499, 1219, 1194, 1027  $\text{cm}^{-1}$ . **HRMS** (ESI):  $m/z$   $[M+Na]^+$  calcd. for  $\text{C}_{24}\text{H}_{22}\text{F}_3\text{NO}_5\text{Na}$  484.1348; Found 484.1334 (-2.9 ppm).

**SMILES:** O=C(OCC1=CC=CC=C1)NC(C2=C(OC)C=CC3=C2C=CC=C3)(C(F)(F)F)C(OCC)=O.

## V. References

- [SI-1]** (a) Salwiczek, M.; Nyakatura, E. K.; Gerling, U. I. M.; Ye, S.; Kocsch, B. Fluorinated amino acids: compatibility with native protein structures and effects on protein–protein interactions. *Chem. Soc. Rev.* **2012**, *41*, 2135. (b) Marsh, E. N. G. Fluorinated proteins: from design and synthesis to structure and stability. *Acc. Chem. Res.* **2014**, *47*, 2878. (c) Berger, A. A.; Völler, J. S.; Budisa, N.; Kocsch, B. Deciphering the fluorine code-the many hats fluorine wears in a protein environment. *Acc. Chem. Res.* **2017**, *50*, 2093.
- [SI-2]** Godfrey, A. G.; Masquelin, T.; Hemmerle, H. A remote-controlled adaptive medchem lab: an innovative approach to enable drug discovery in the 21st Century. *Drug Discovery Today* **2013**, *18*, 795.
- [SI-3]** Burger, K.; Karl Gaa, E.; Sewald, N.; Schierlinger, C. New synthetic pathways to 3,3,3-trifluoroalanine, 2-deutero-3,3,3-trifluoroalanine and their derivatives. *Chem. Sci.* **1991**, *46*, 361.
- [SI-4]** (a) Burger, K.; Höß, E.; Gaa, K.; Sewald, N.; Schierlinger, C. New Synthetic Pathways to 3,3,3-Trifluoroalanine, 2-Deutero-3,3,3-trifluoroalanine and their Derivatives. *Zeitschrift für Naturforschung B* **1990**, *46*, 361. (b) Bravo, P.; Fustero, S.; Guidetti, M.; Volonterio, A.; Zanda, M. Stereoselective Mannich-Type Reaction of an Acyclic Ketimine with a Substituted Chlorotitanium Enolate: Efficient Approach to D-erythro- $\alpha$ -Trifluoromethyl- $\beta$ -hydroxyaspartic Units. *J. Org. Chem.* **1999**, *64*, 8731.
- [SI-5]** Husmann, R.; Sugiono, E.; Mersmann, S.; Raabe, G.; Rueping, M.; Bolm, C. Enantioselective organocatalytic synthesis of quaternary  $\alpha$ -amino acids bearing a CF<sub>3</sub> moiety. *Org. Lett.* **2011**, *13*, 1044.



## VI. NMR Spectra

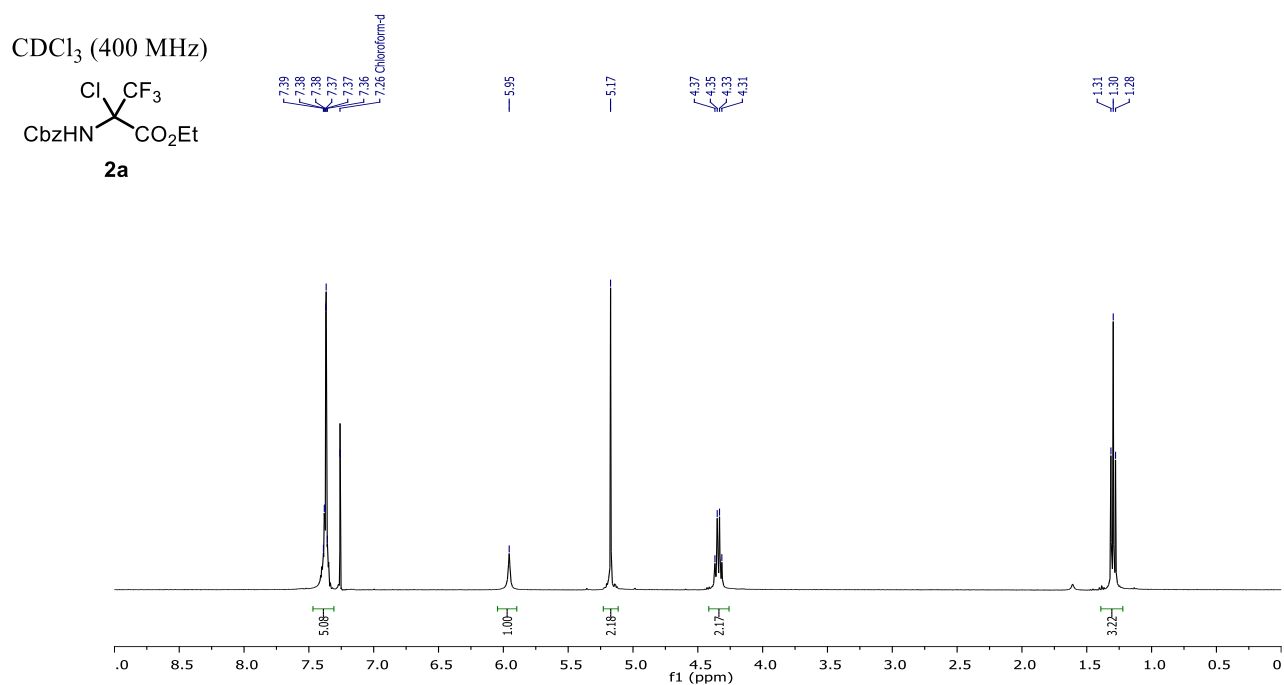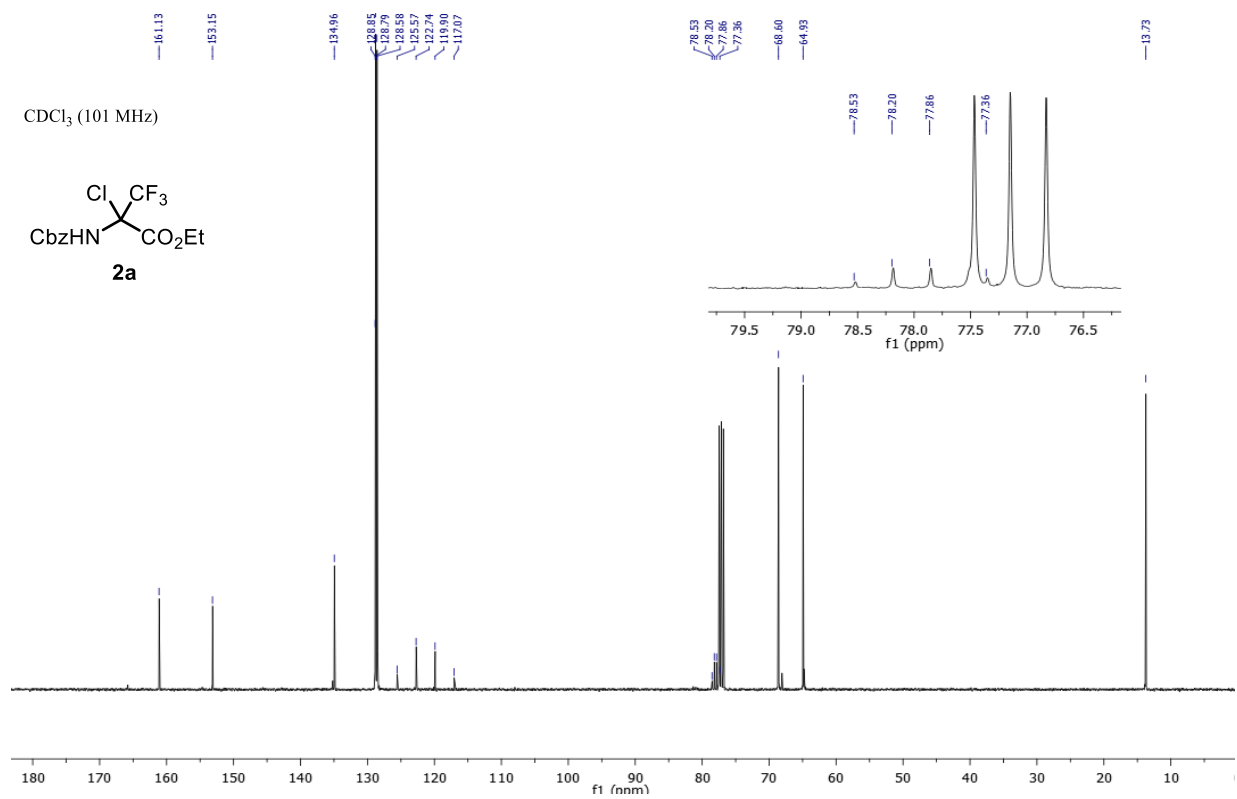

gkz17crude-  
F19-2.11.fid  
CDCl3 (376 MHz)

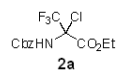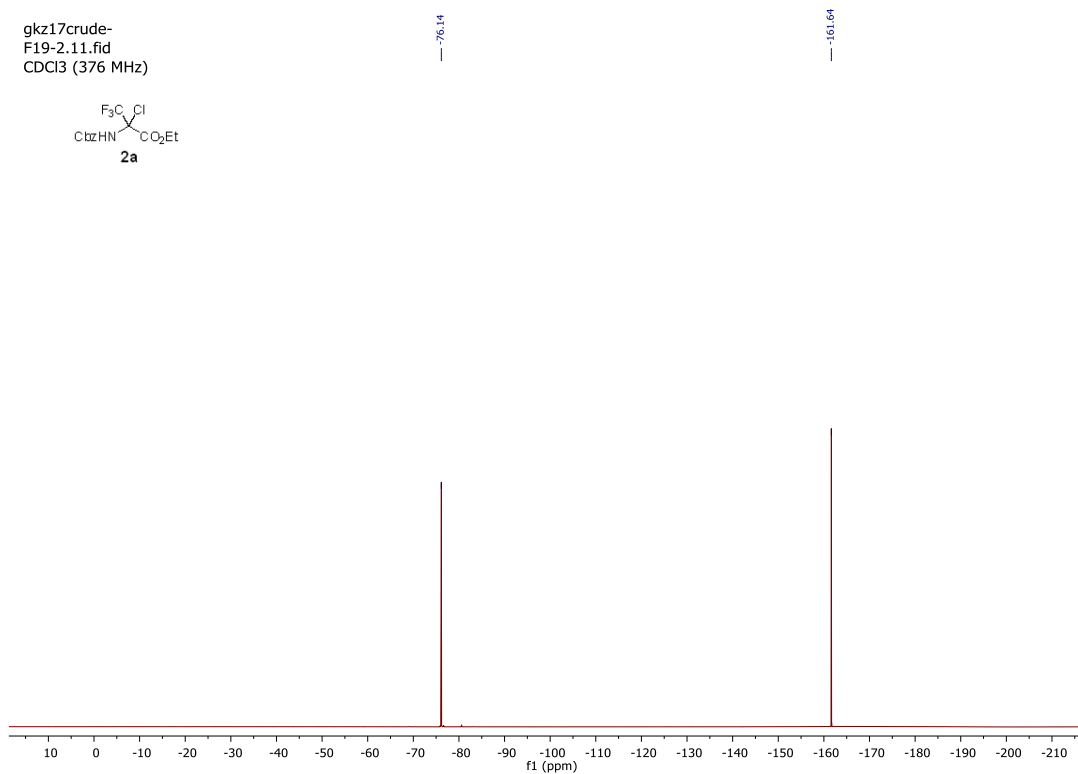

7.820  
7.801  
7.627  
7.620  
7.609  
7.601  
7.477  
7.468  
7.439  
7.388  
7.369  
7.351

6.247  
6.228

4.580  
4.554  
4.536  
4.519  
4.509  
4.493  
4.424  
4.406  
4.388  
4.284  
4.268  
4.251

1.382  
1.364  
1.347

gkz111crude36h2.10.fid  
CDCl3 (400 MHz)

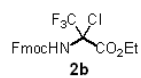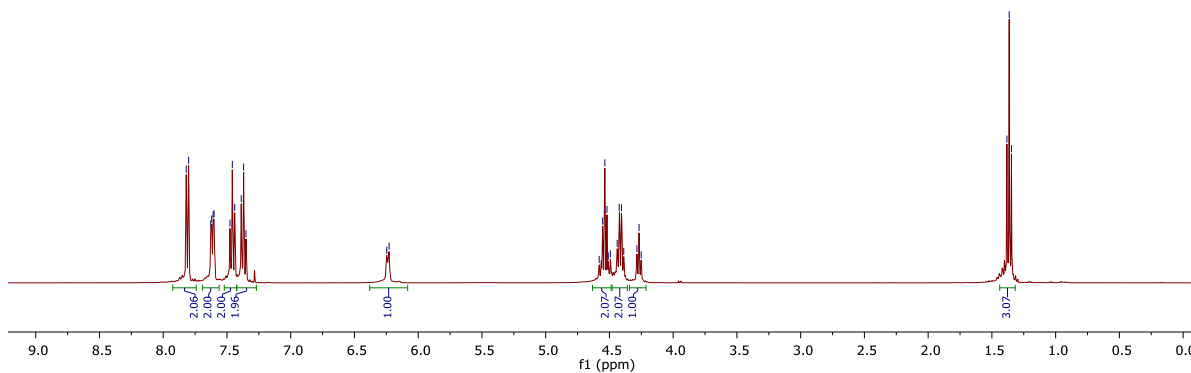

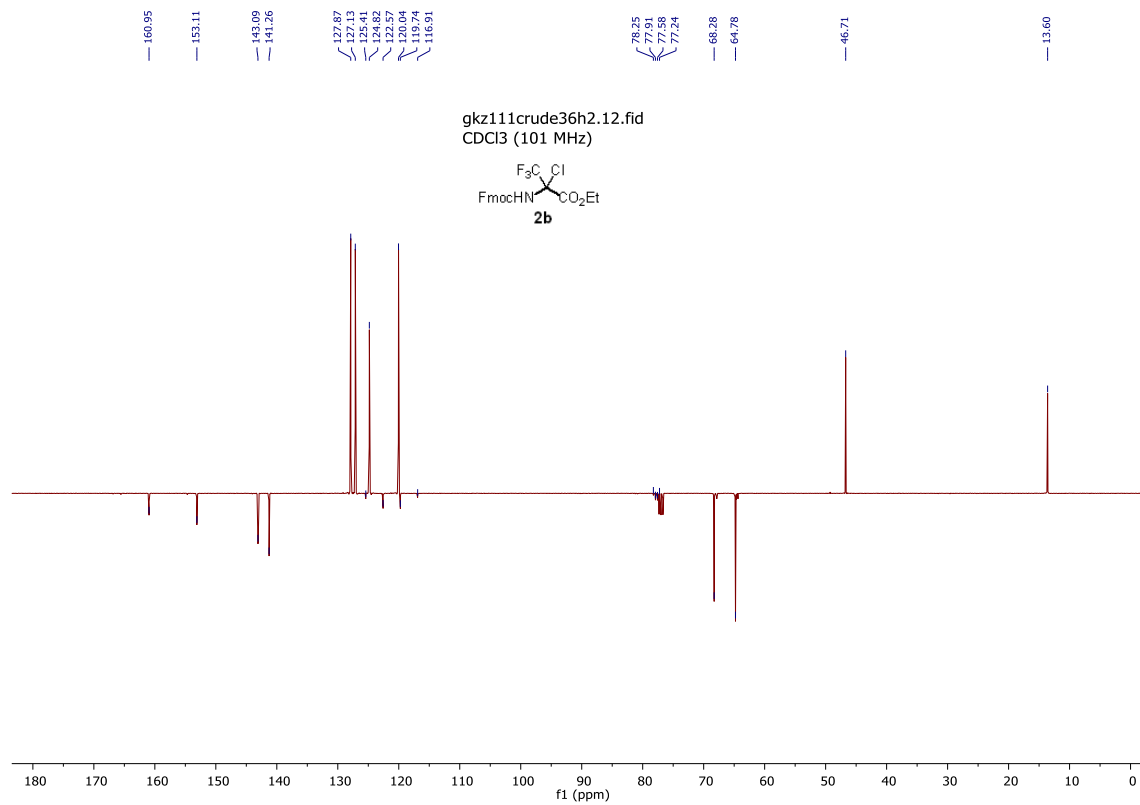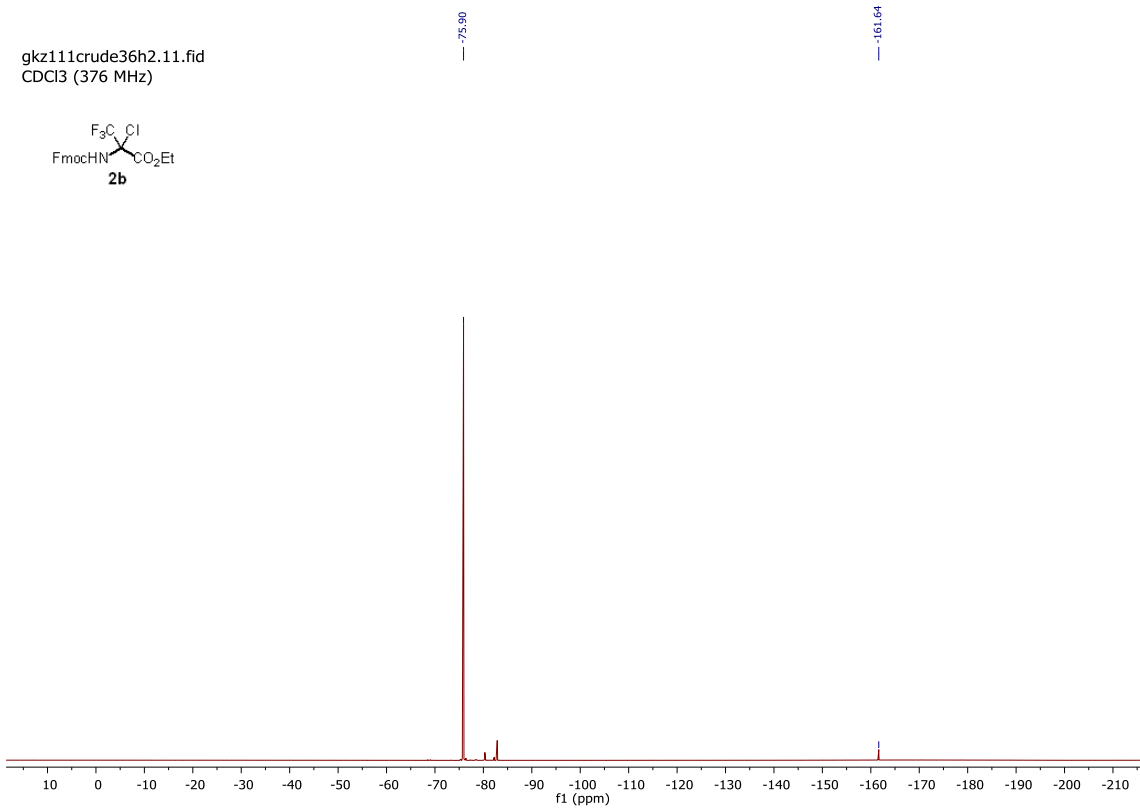

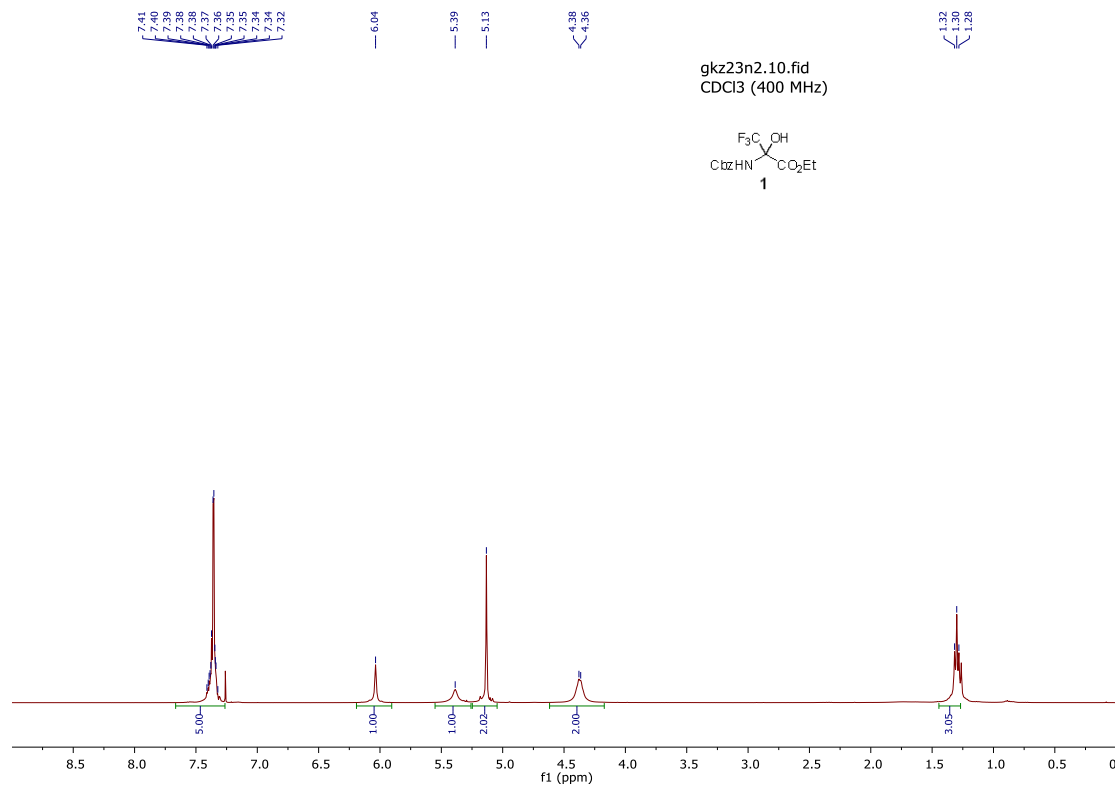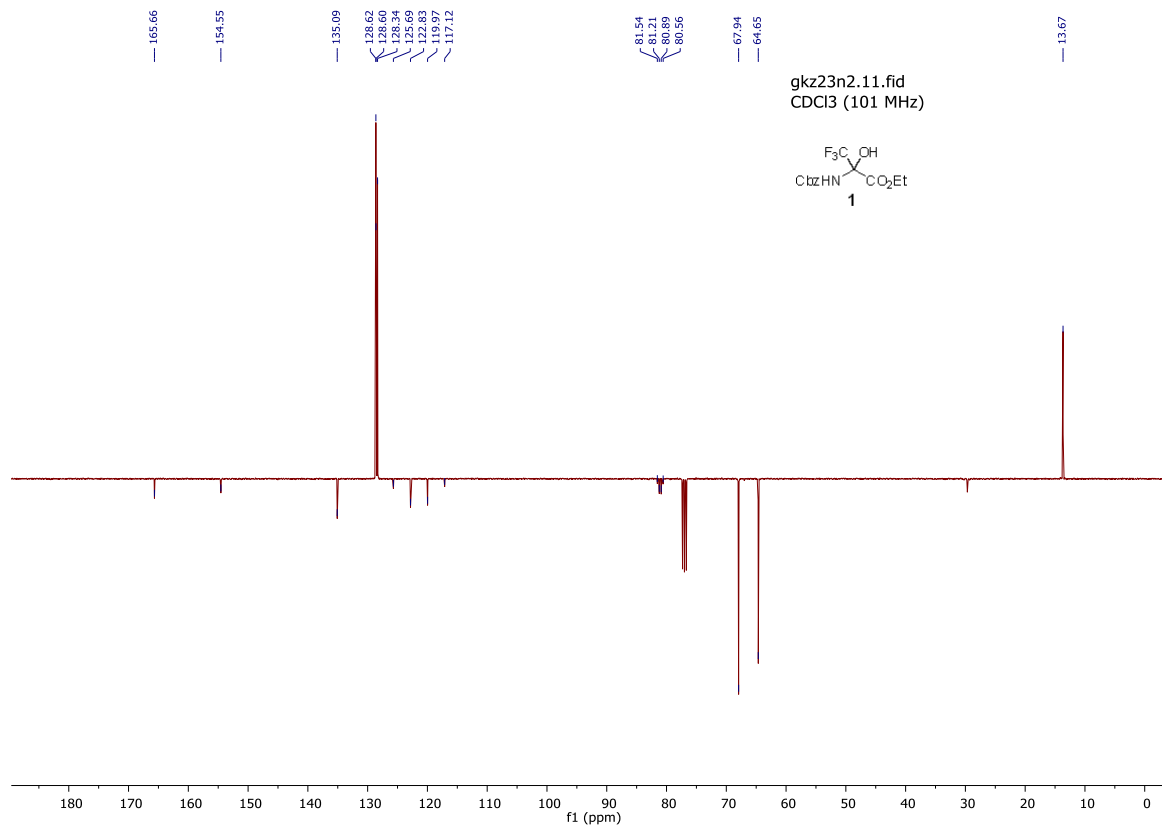

gkz23test24h.11.fid  
CDCl<sub>3</sub> (376 MHz)

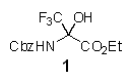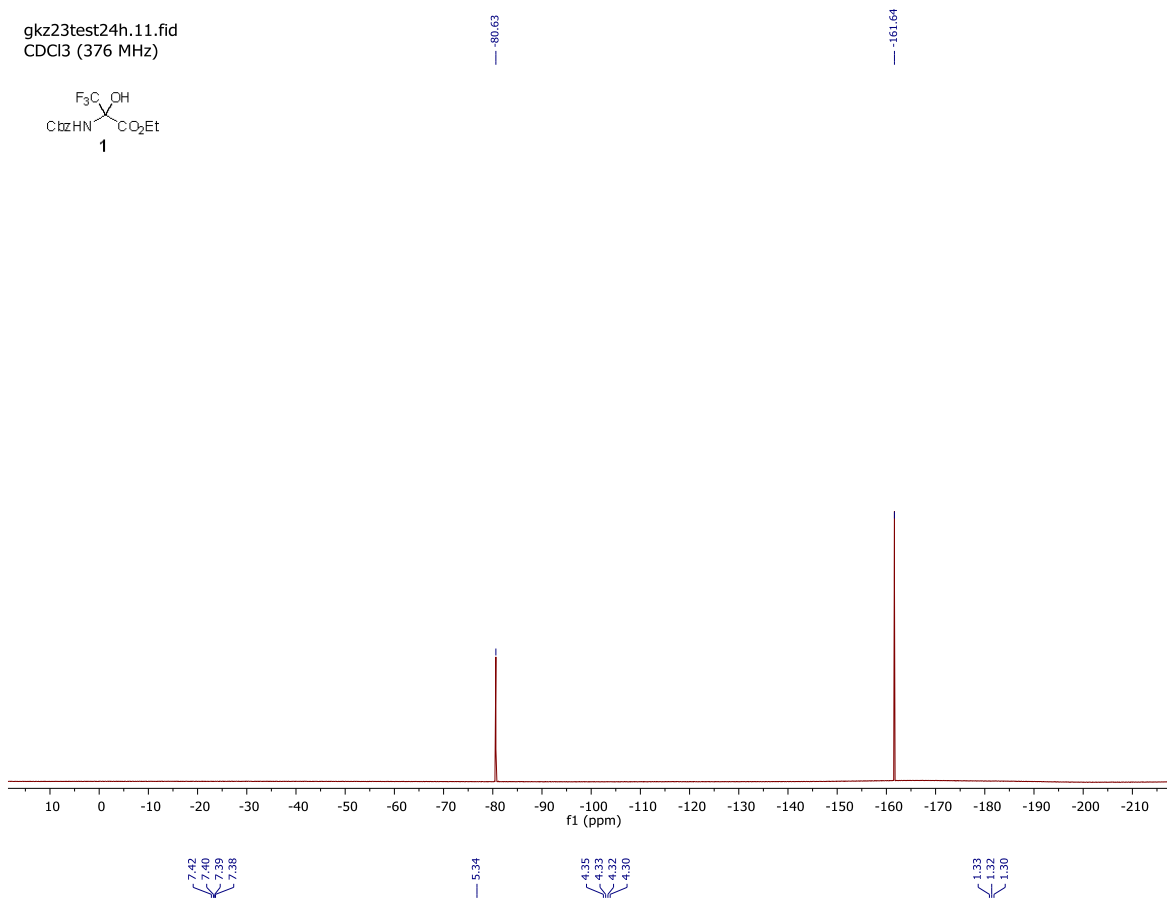

gkz33test7h.10.fid  
CDCl<sub>3</sub> (400 MHz)

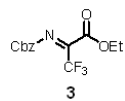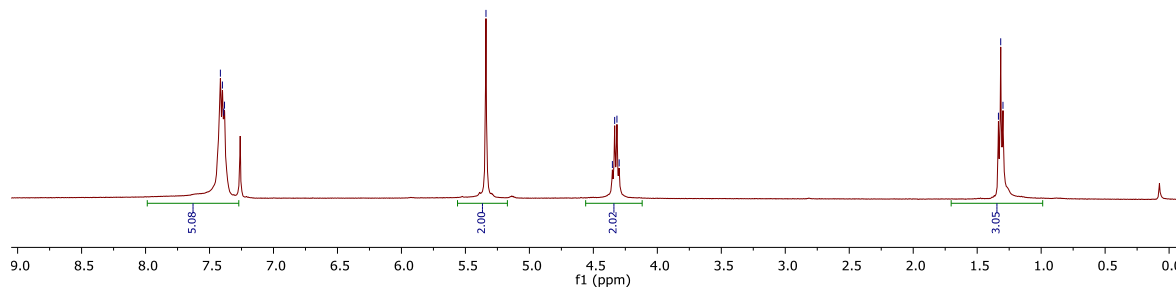

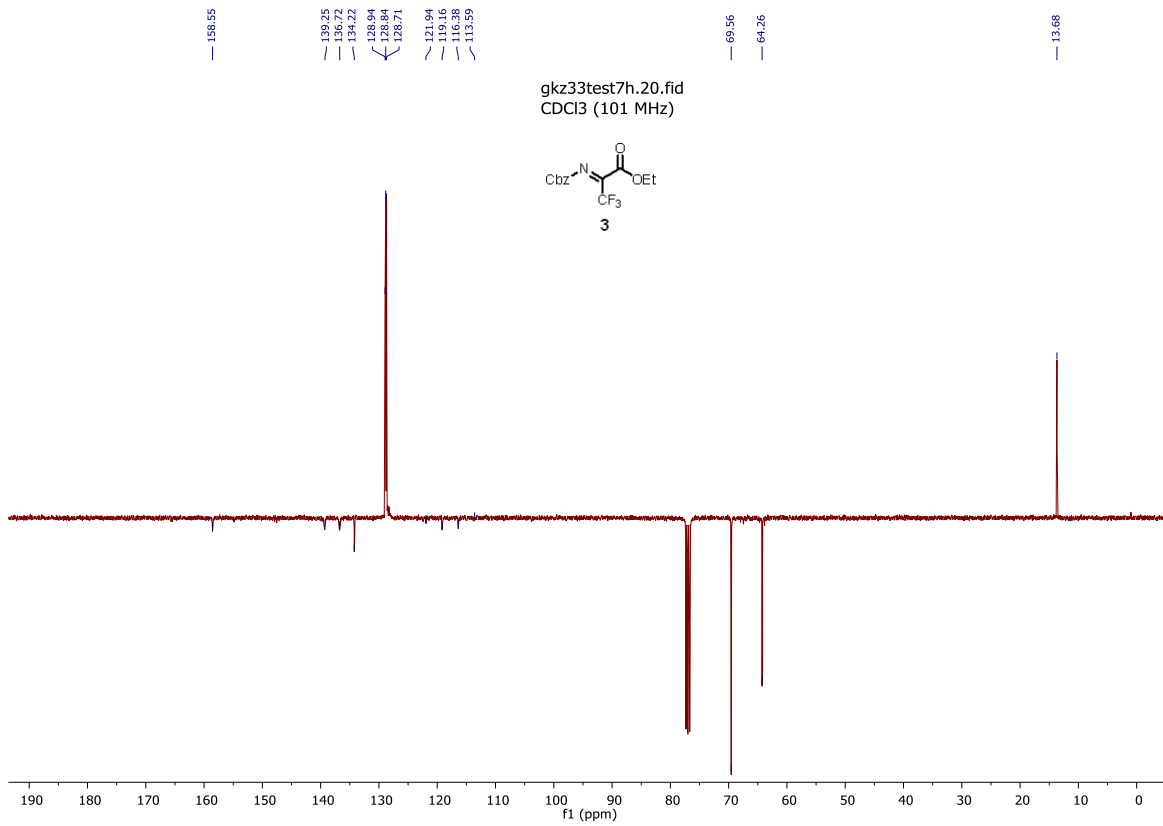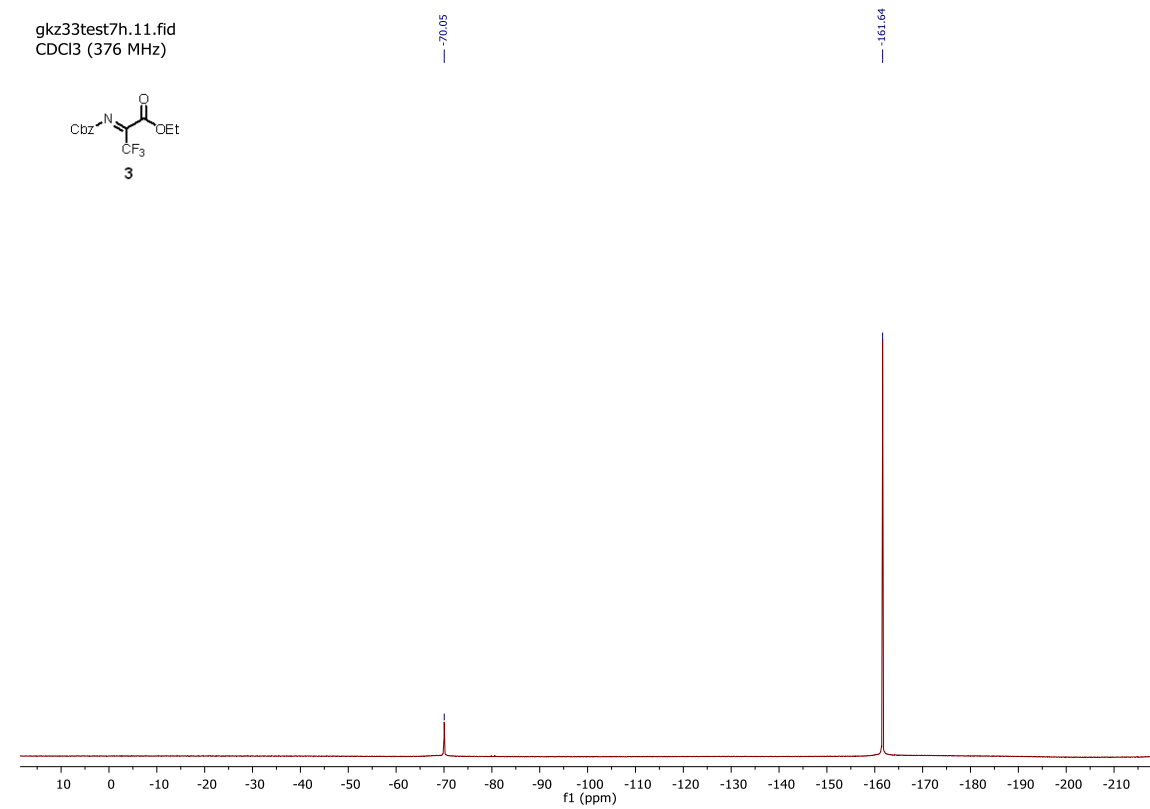

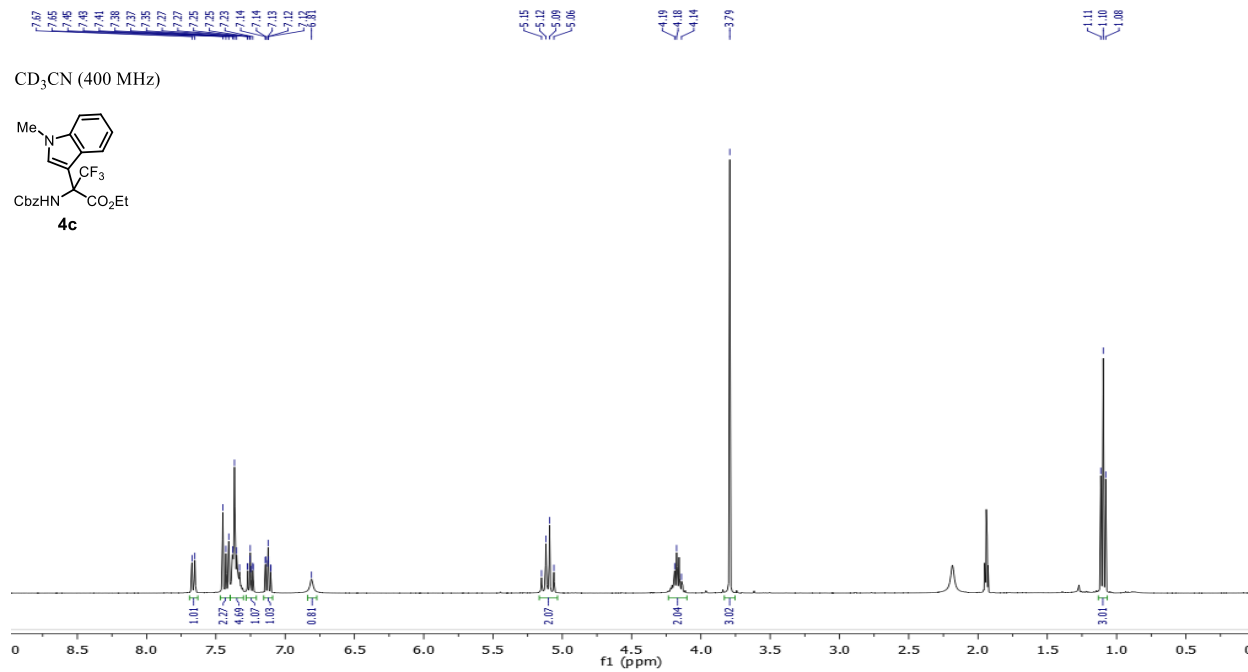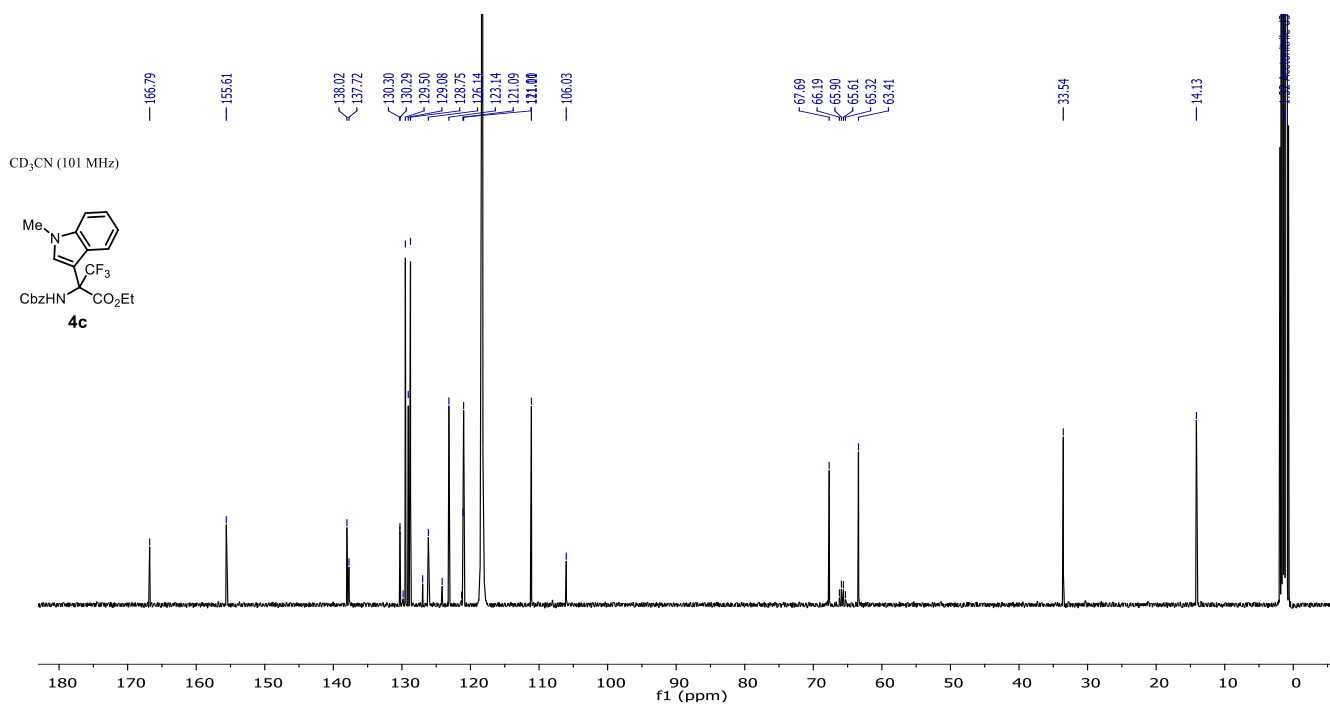

CDCl<sub>3</sub> (376 MHz)

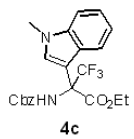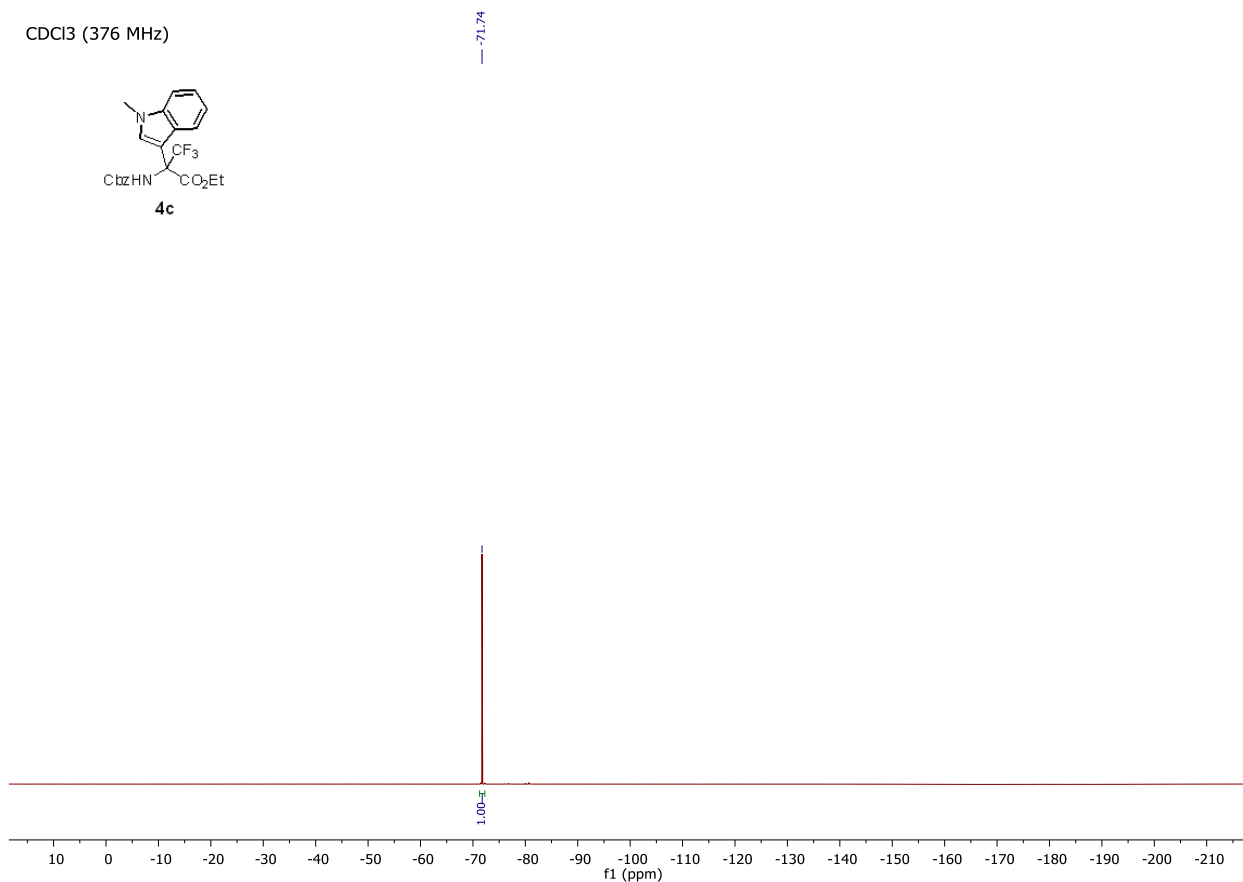

gkz50p2n3.10.fid  
CDCl<sub>3</sub> (400 MHz)

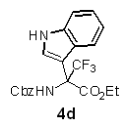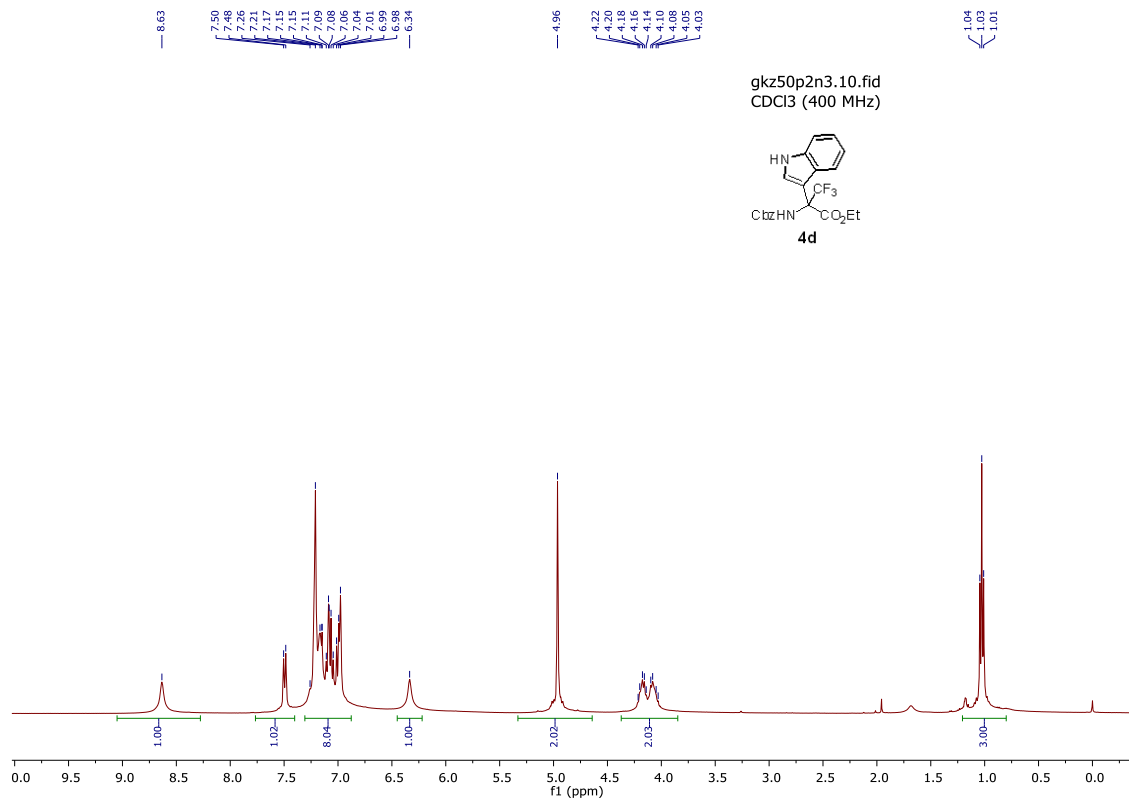



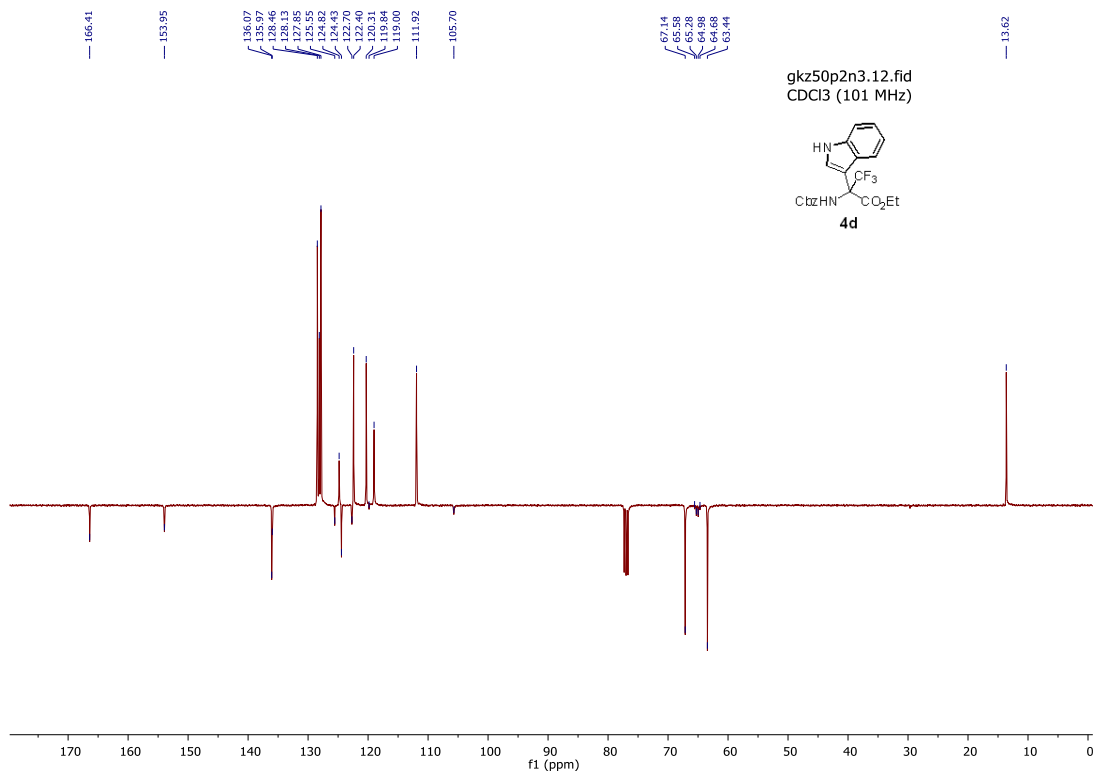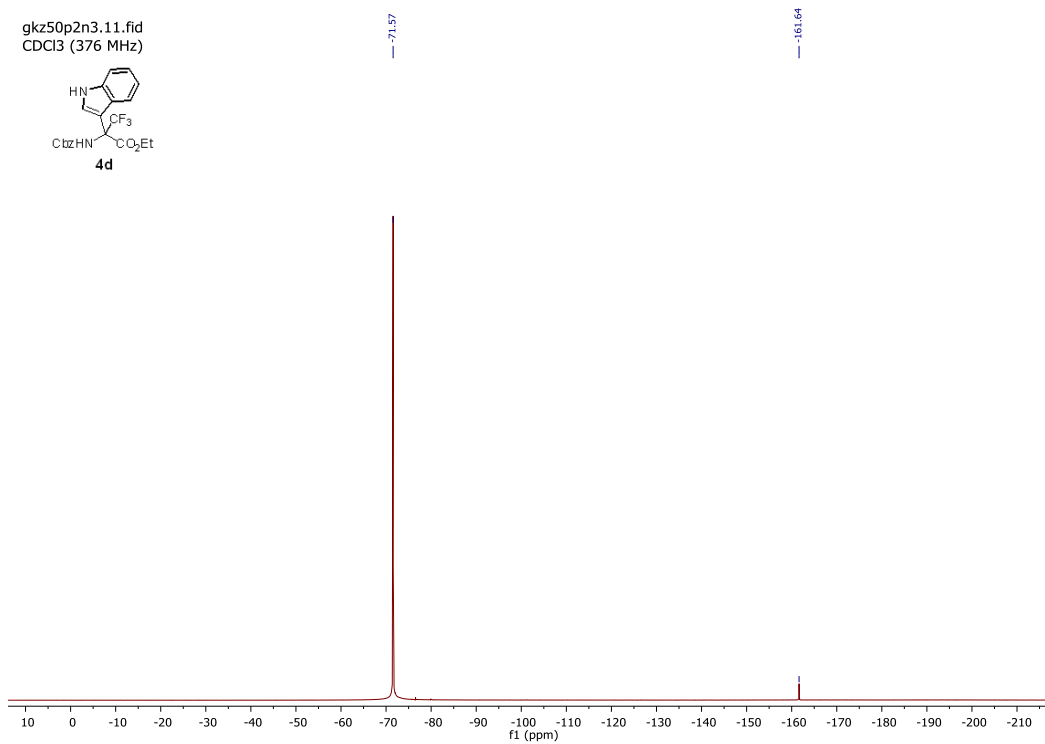

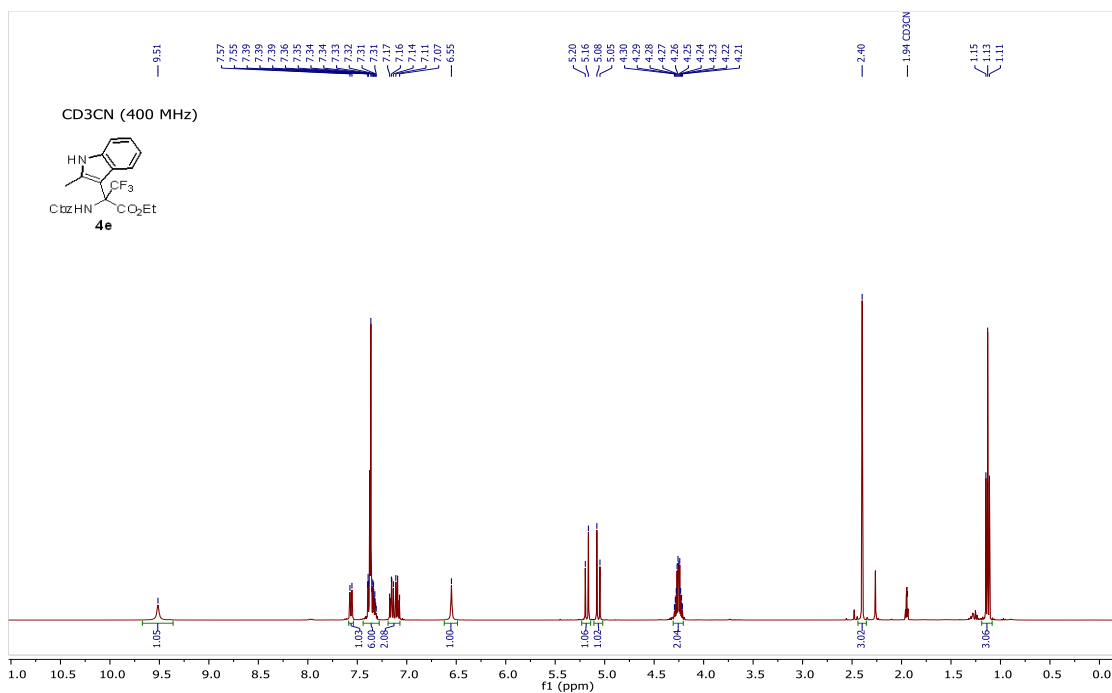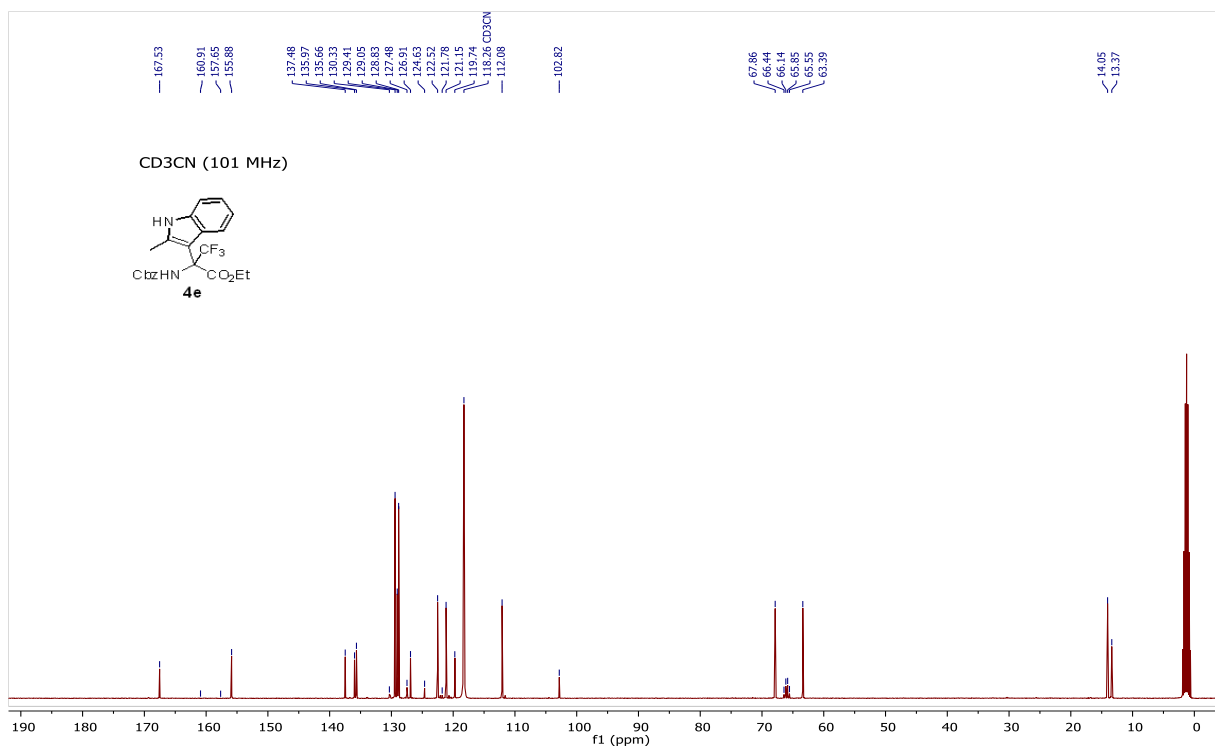

CD3CN (376 MHz)

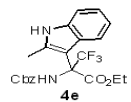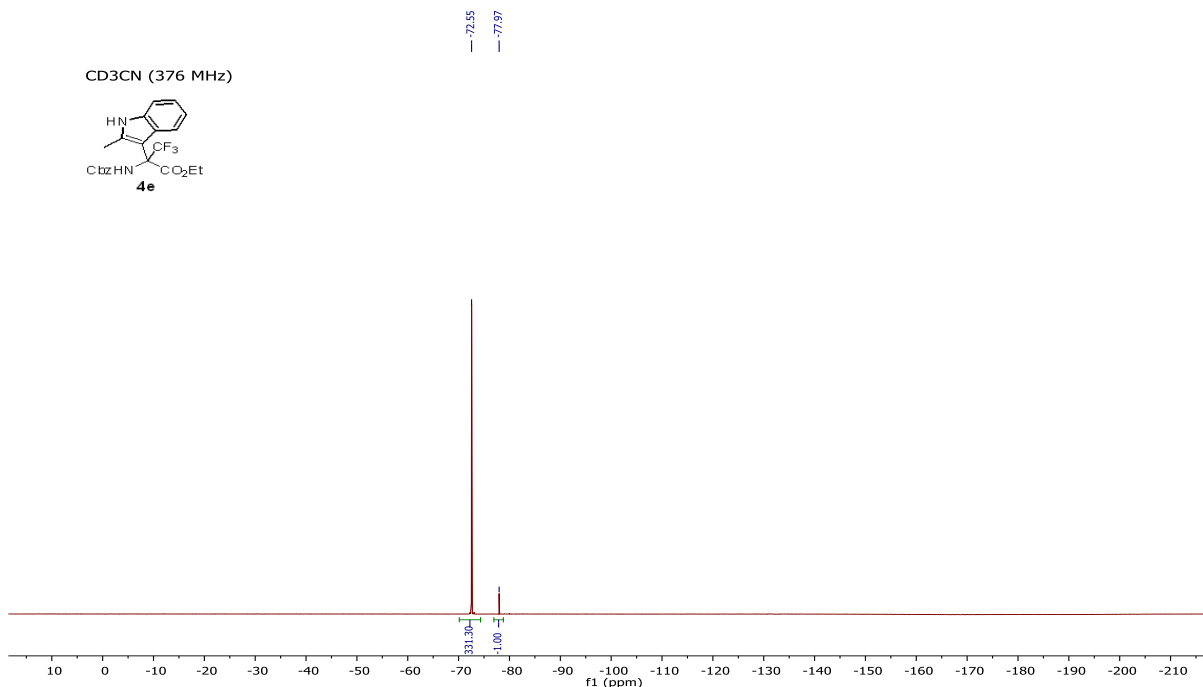

8.231, 7.773, 7.685, 7.666, 7.593, 7.571, 7.551, 7.444, 7.444, 7.425, 7.413, 7.407, 7.385, 7.380, 7.360, 7.344, 7.337, 7.328, 7.328, 7.317, 7.317, 7.309, 7.307, 7.306, 7.299, 7.237, 7.233, 7.220, 7.205, 7.205, 7.196, 7.190, 7.179, 7.173, 6.458, 4.459, 4.441, 4.415, 4.415, 4.393, 4.389, 4.376, 4.371, 4.363, 4.357, 4.353, 4.353, 4.336, 4.318, 4.278, 4.260, 4.252, 2.422, 1.267, 1.249, 1.231

gkz119p2p2n4.10.fid  
CDCl3 (400 MHz)

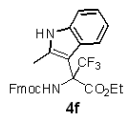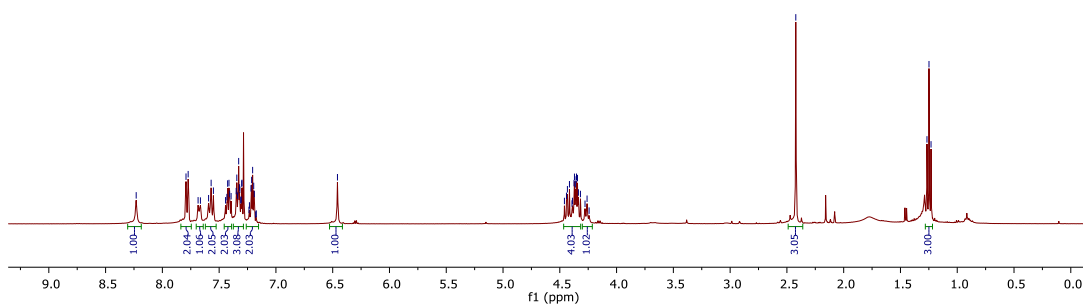

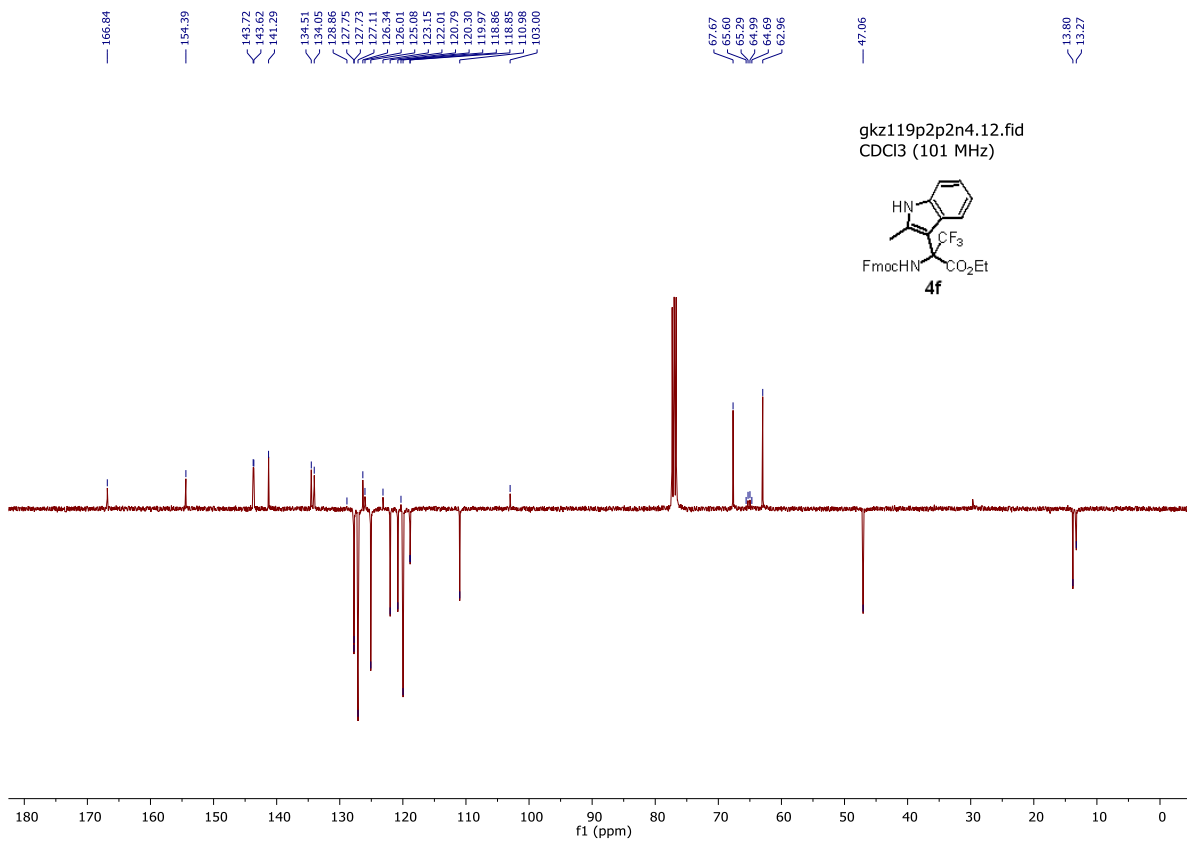

gkz119p2p2n4.11.fid  
CDCl<sub>3</sub> (376 MHz)

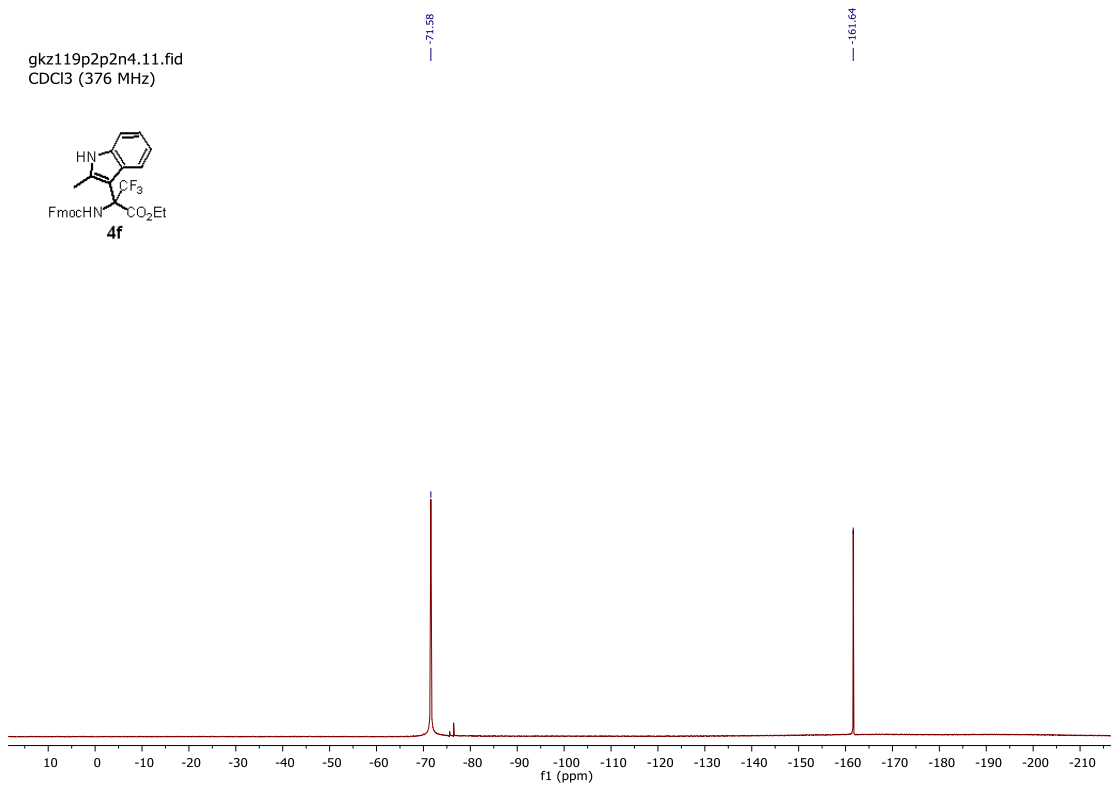

CD<sub>3</sub>CN (400 MHz)

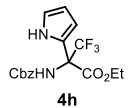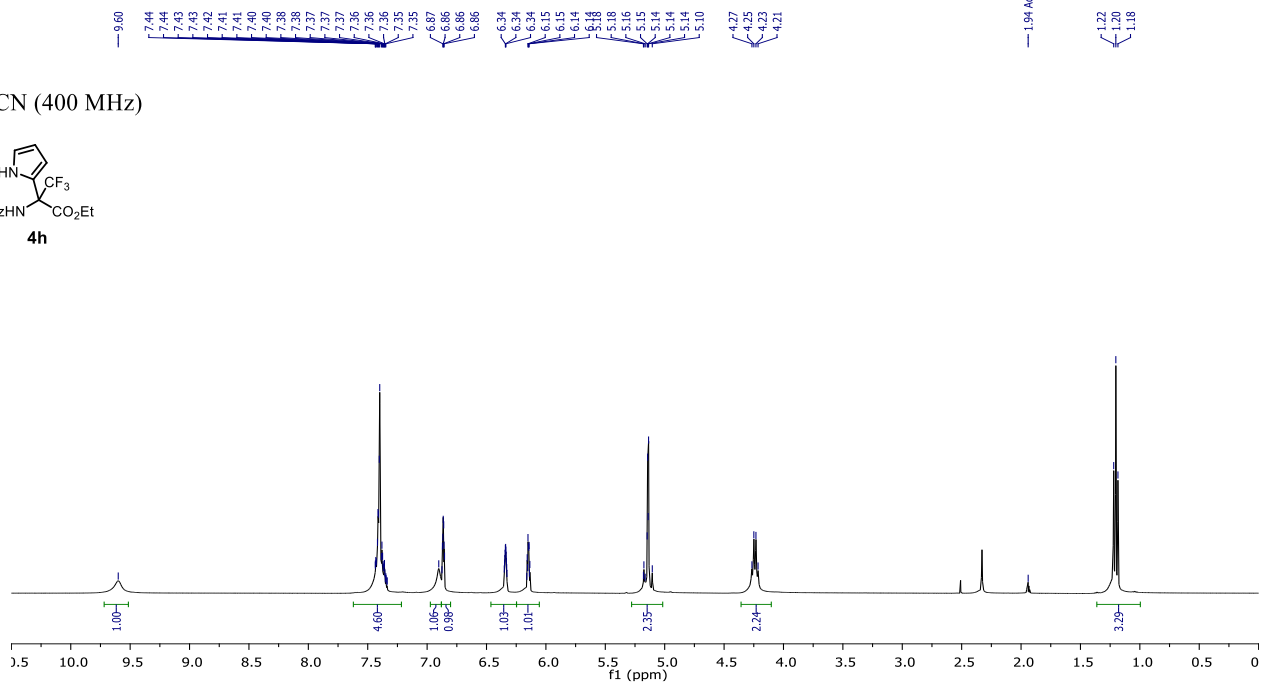

CD<sub>3</sub>CN (101 MHz)

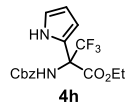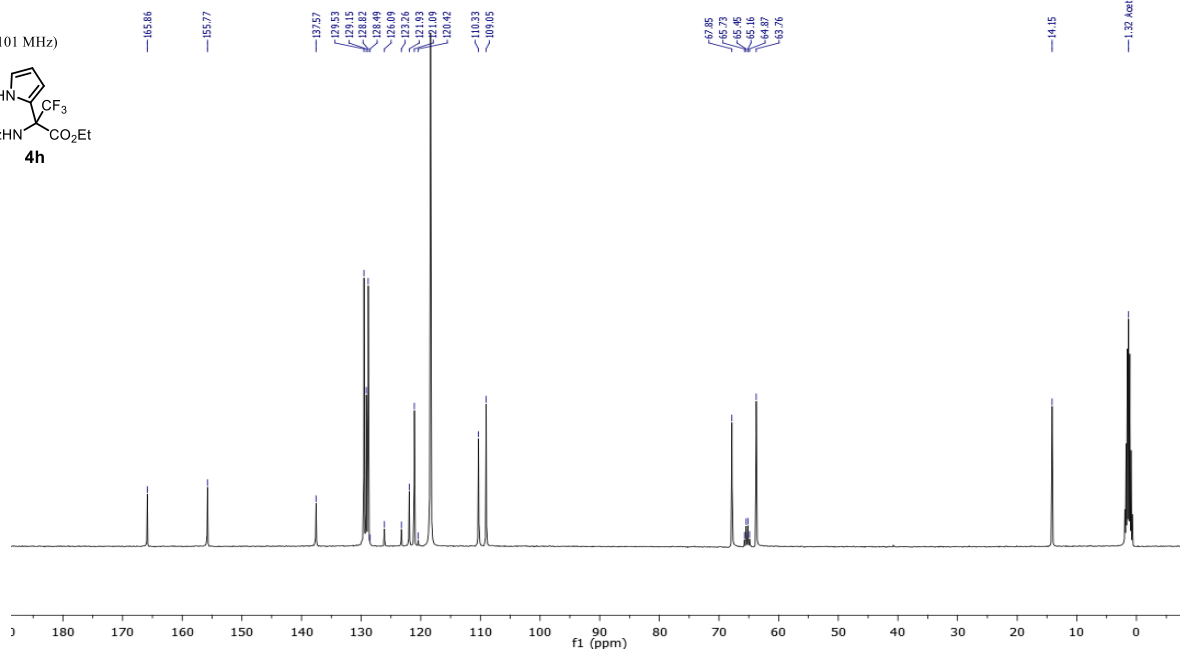

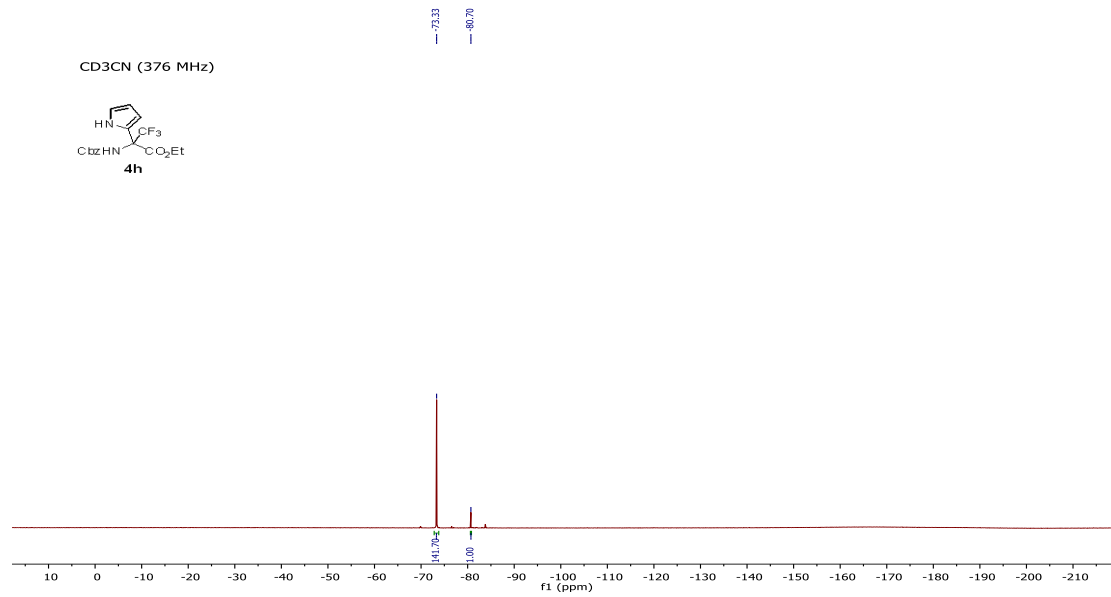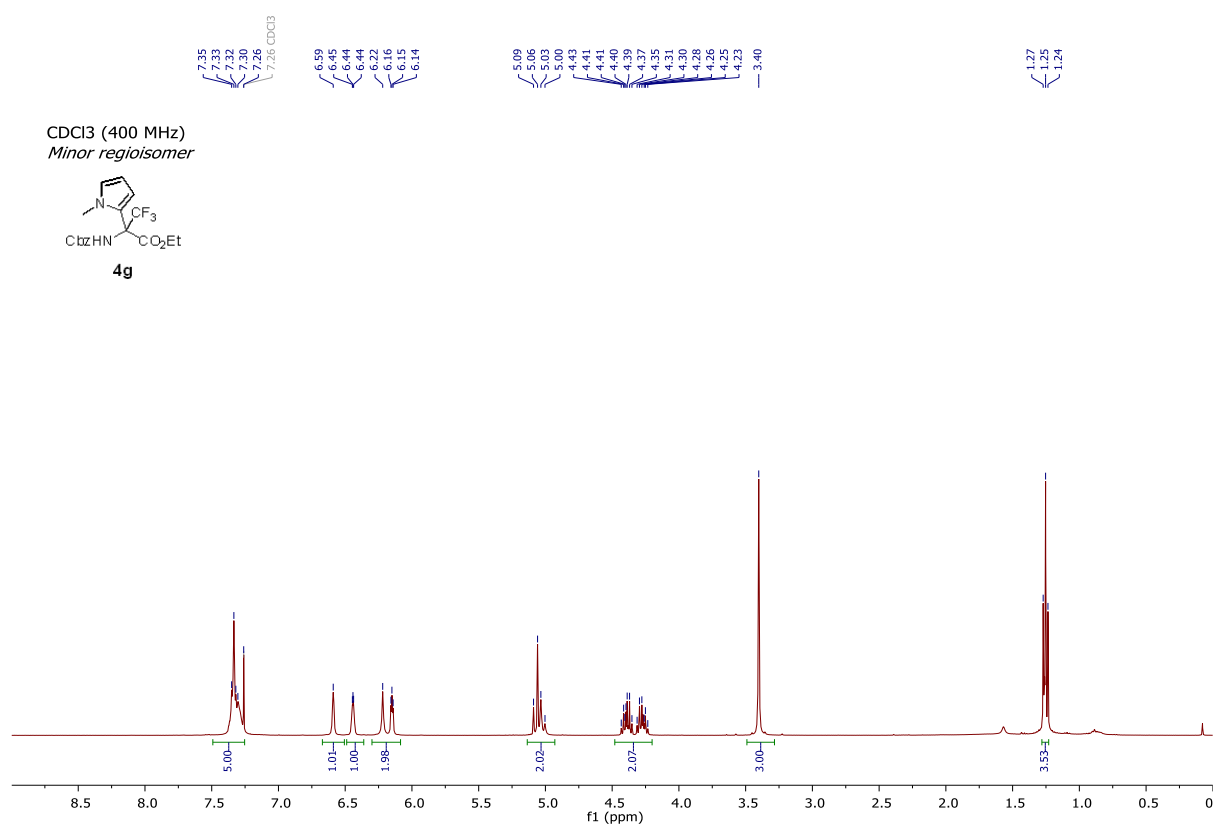

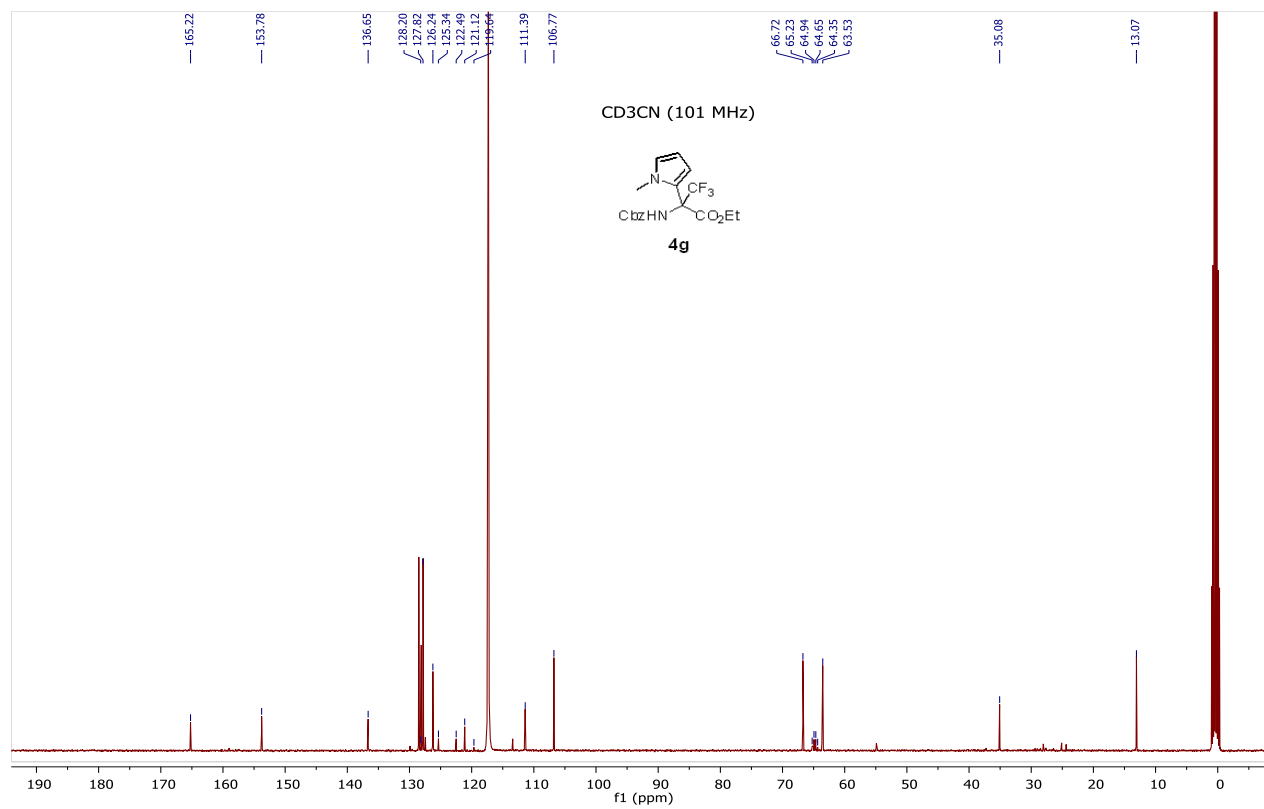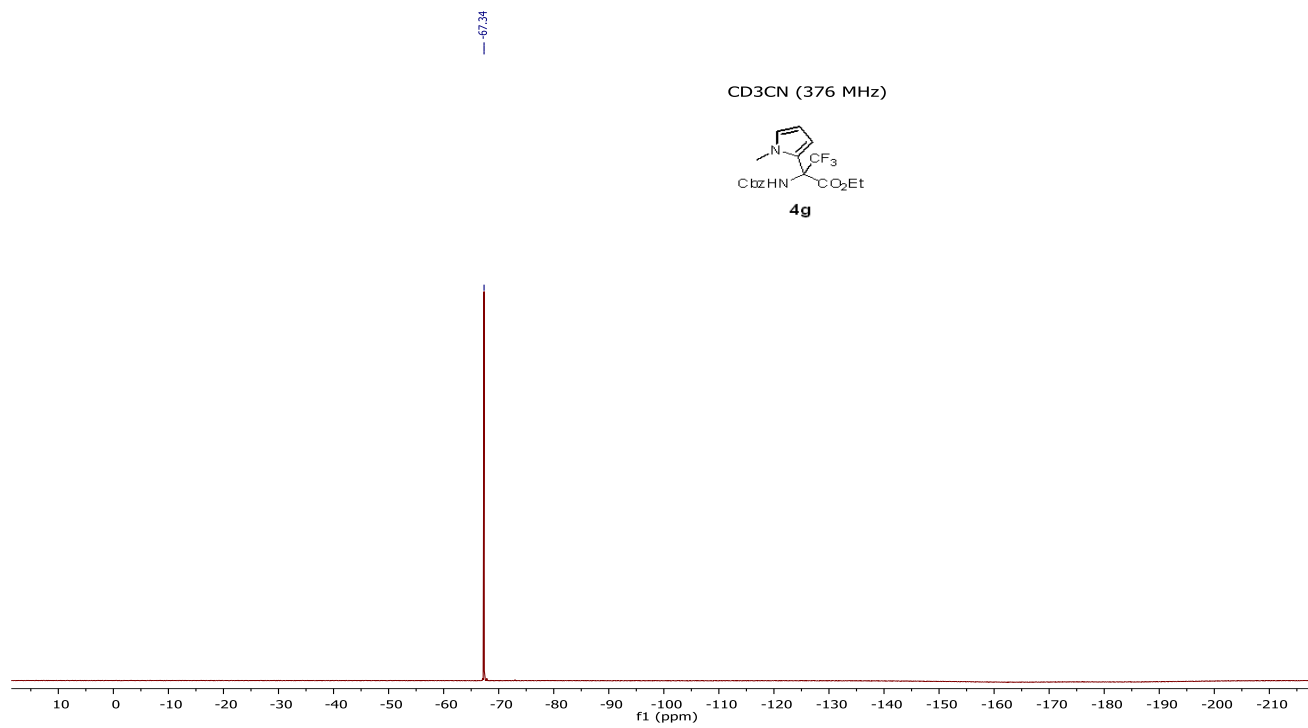

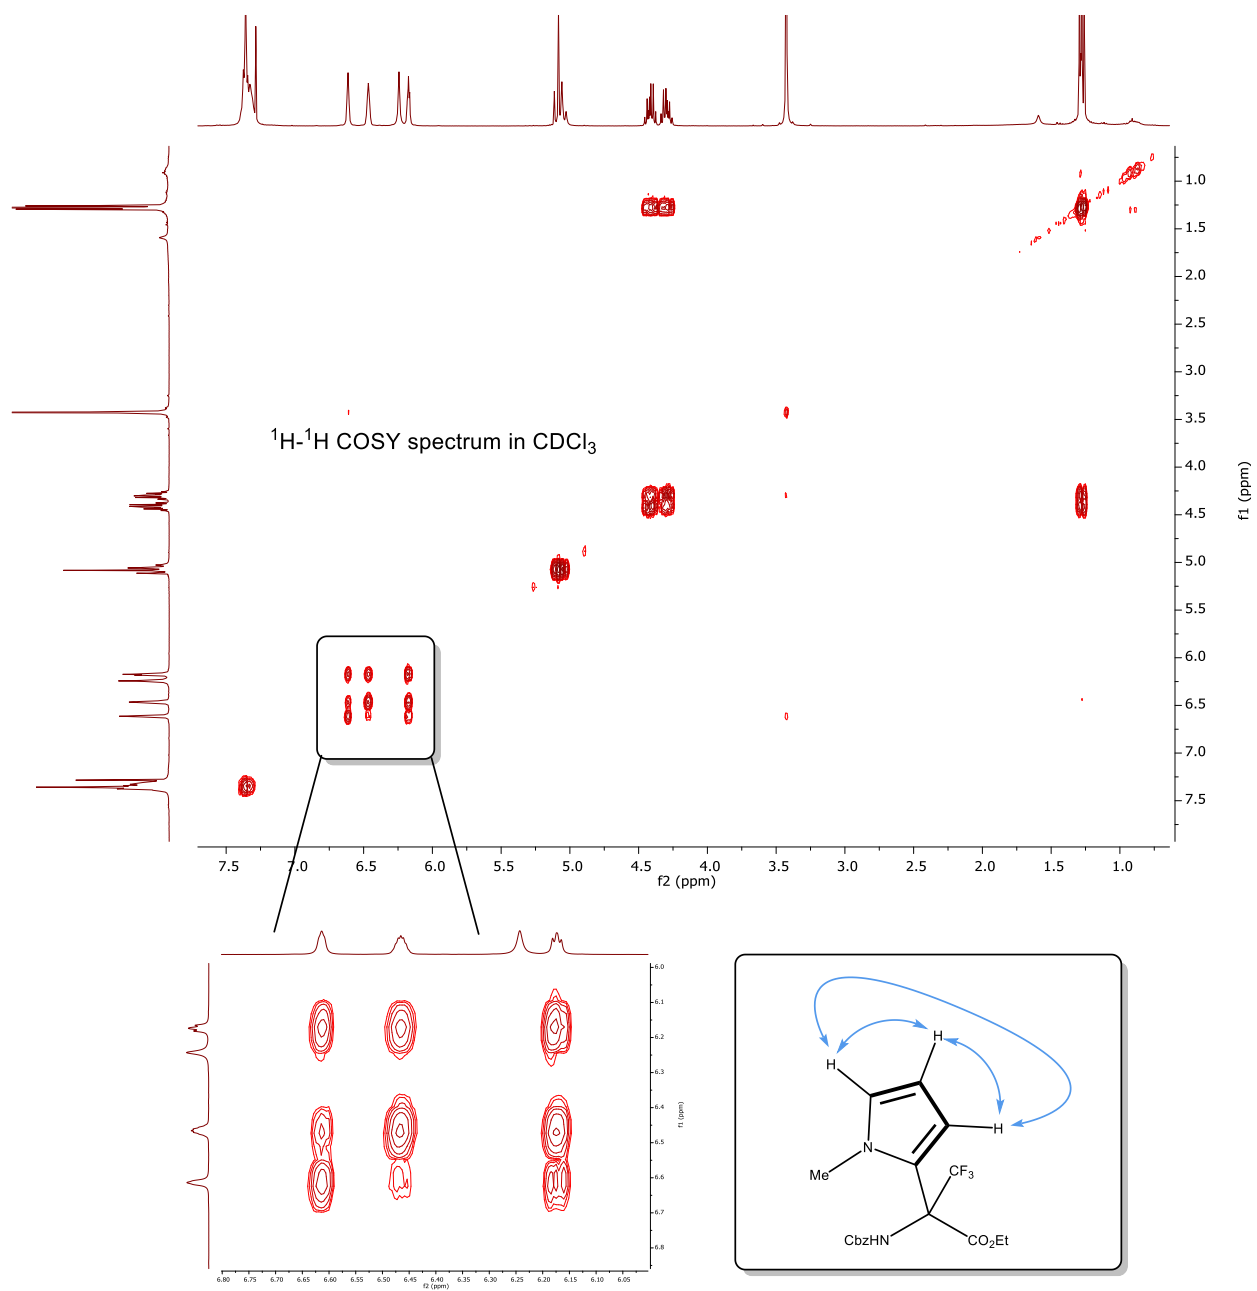



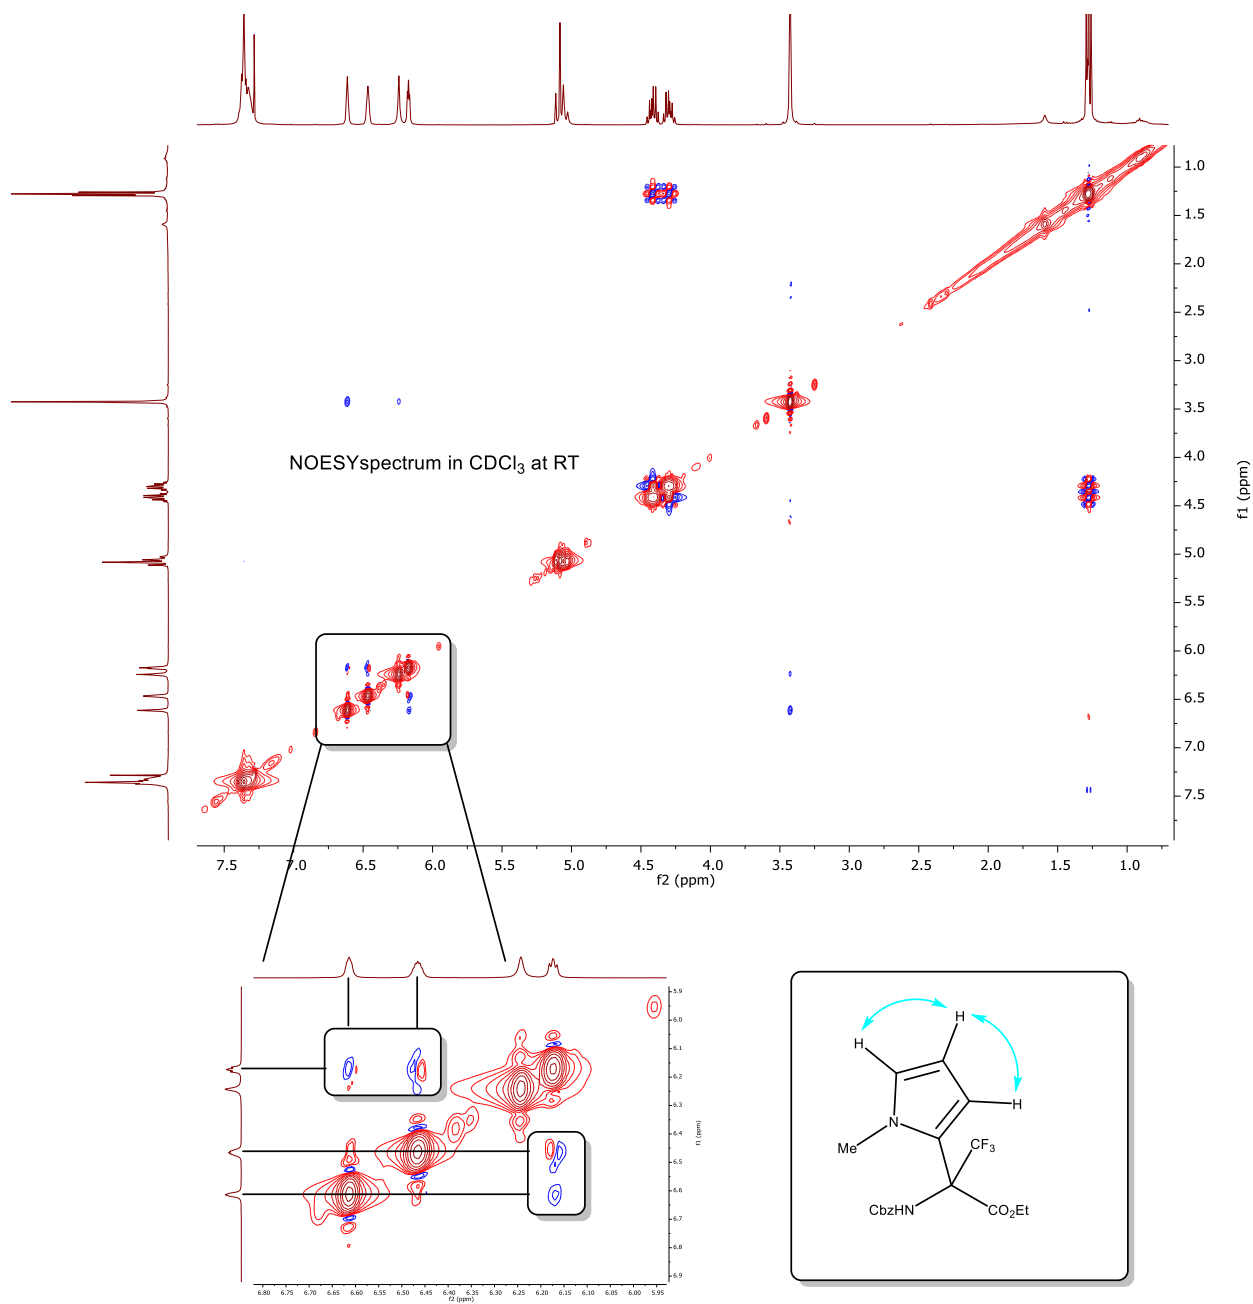

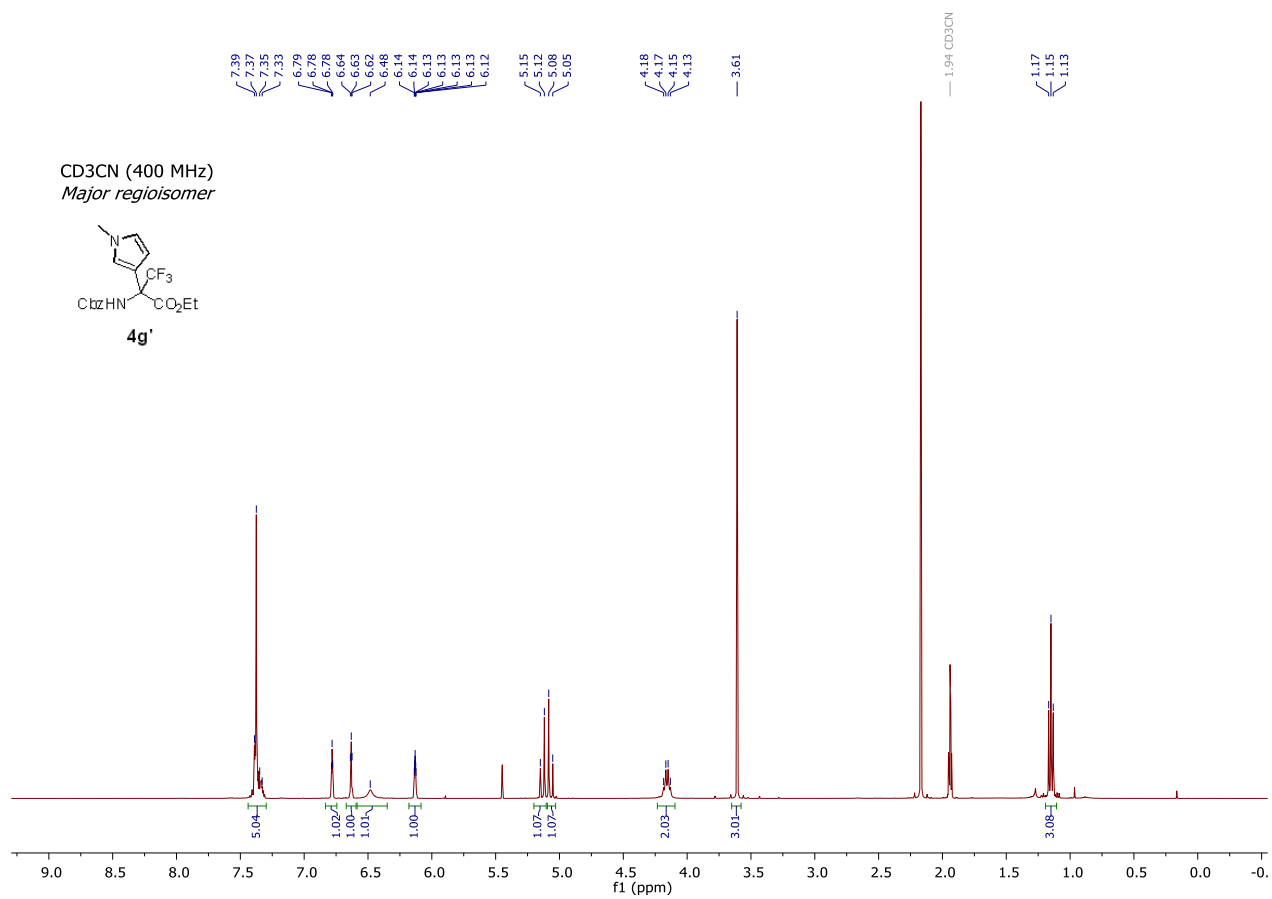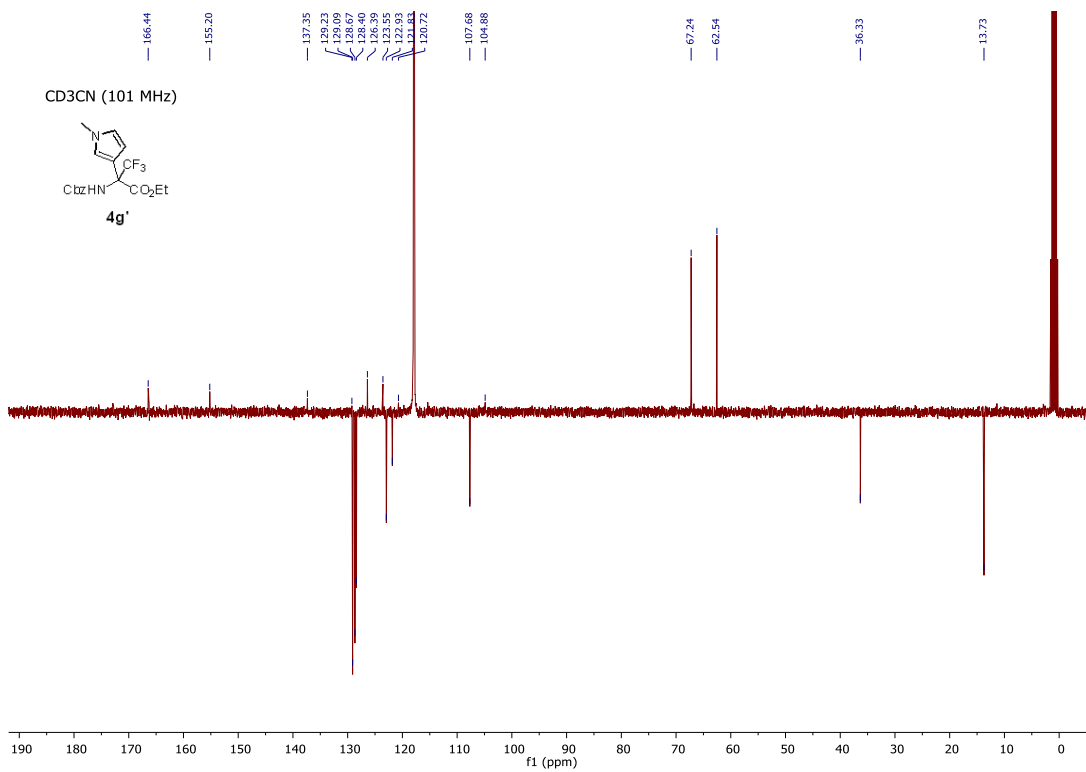

CDCl<sub>3</sub> (376 MHz)

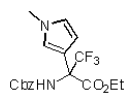

**4g'**

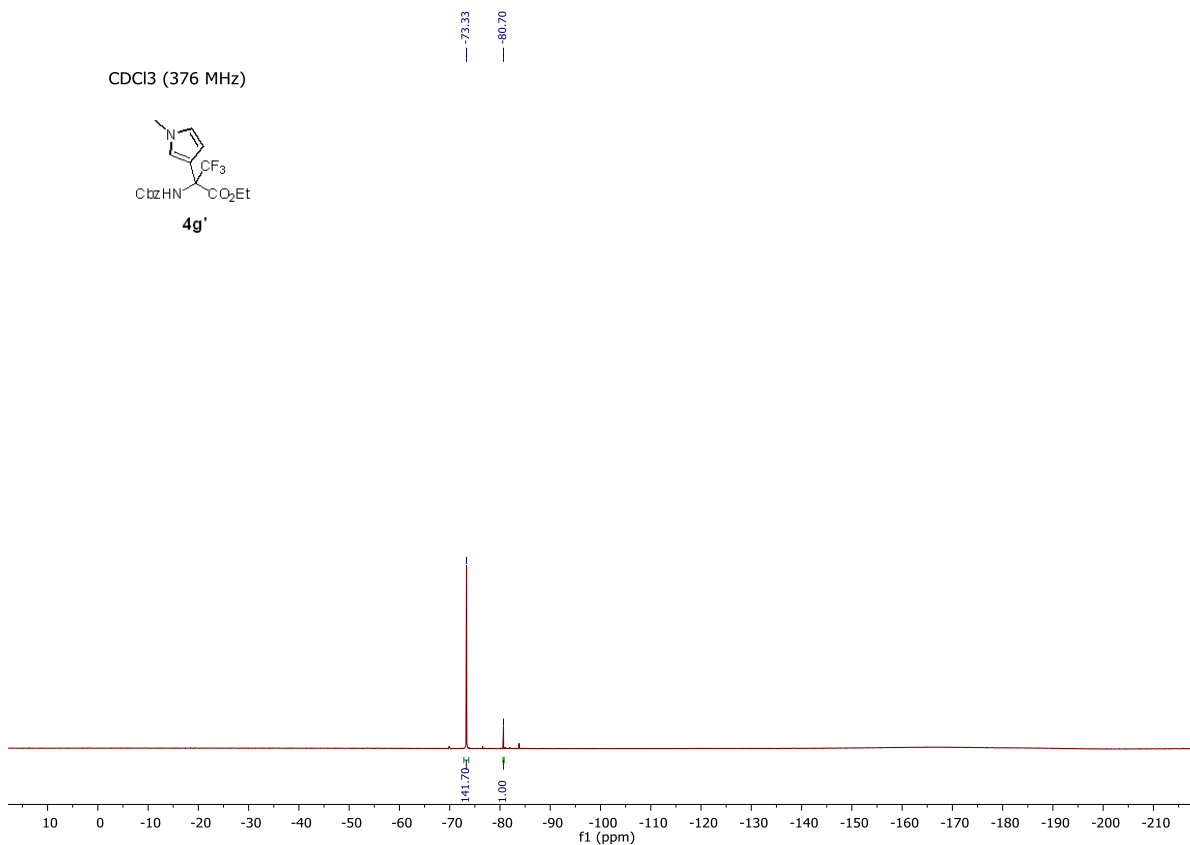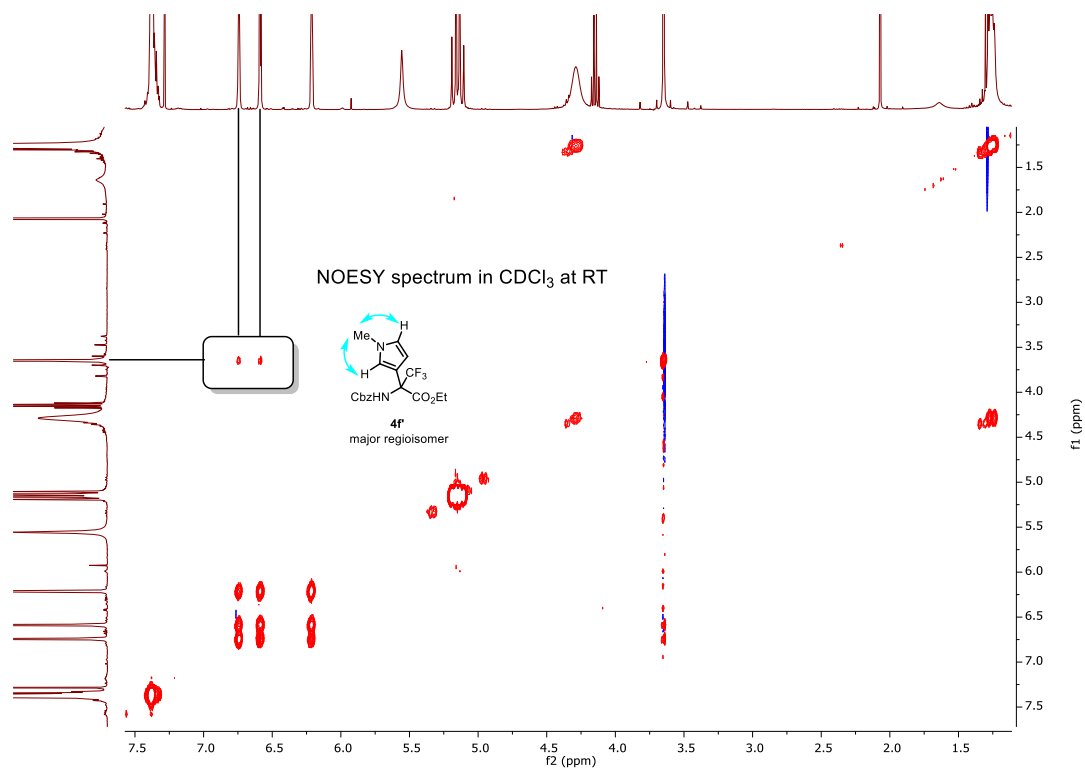

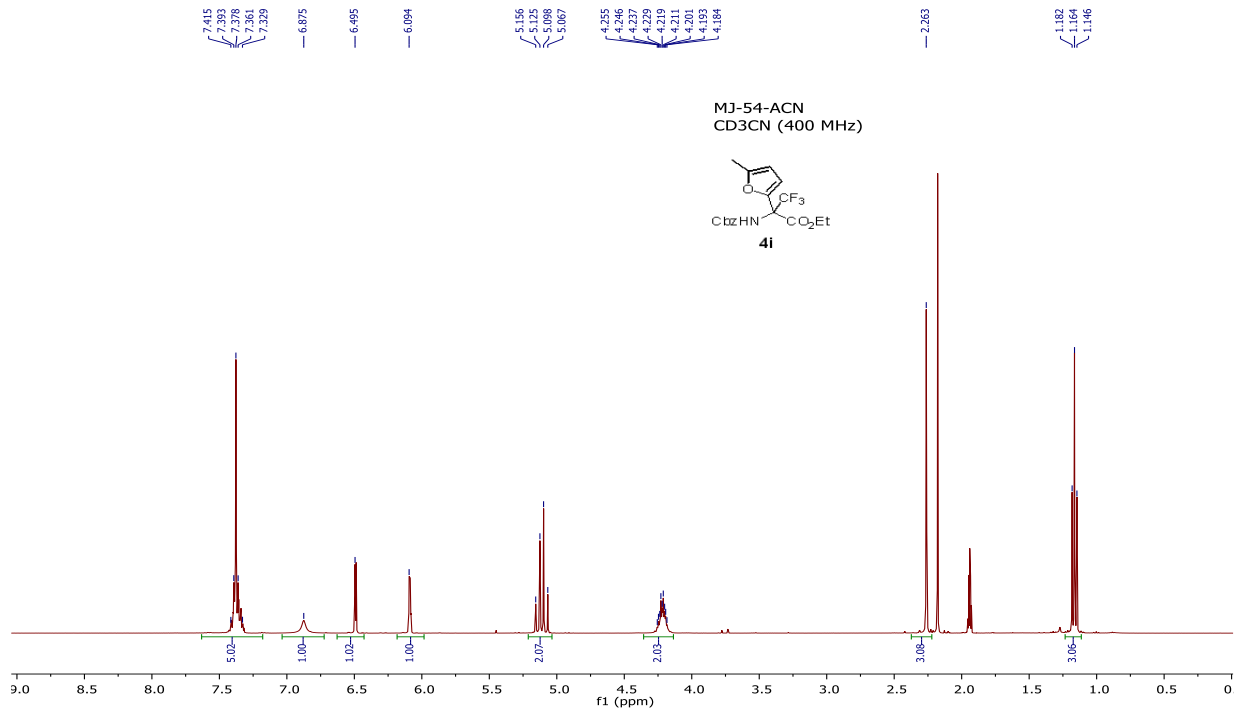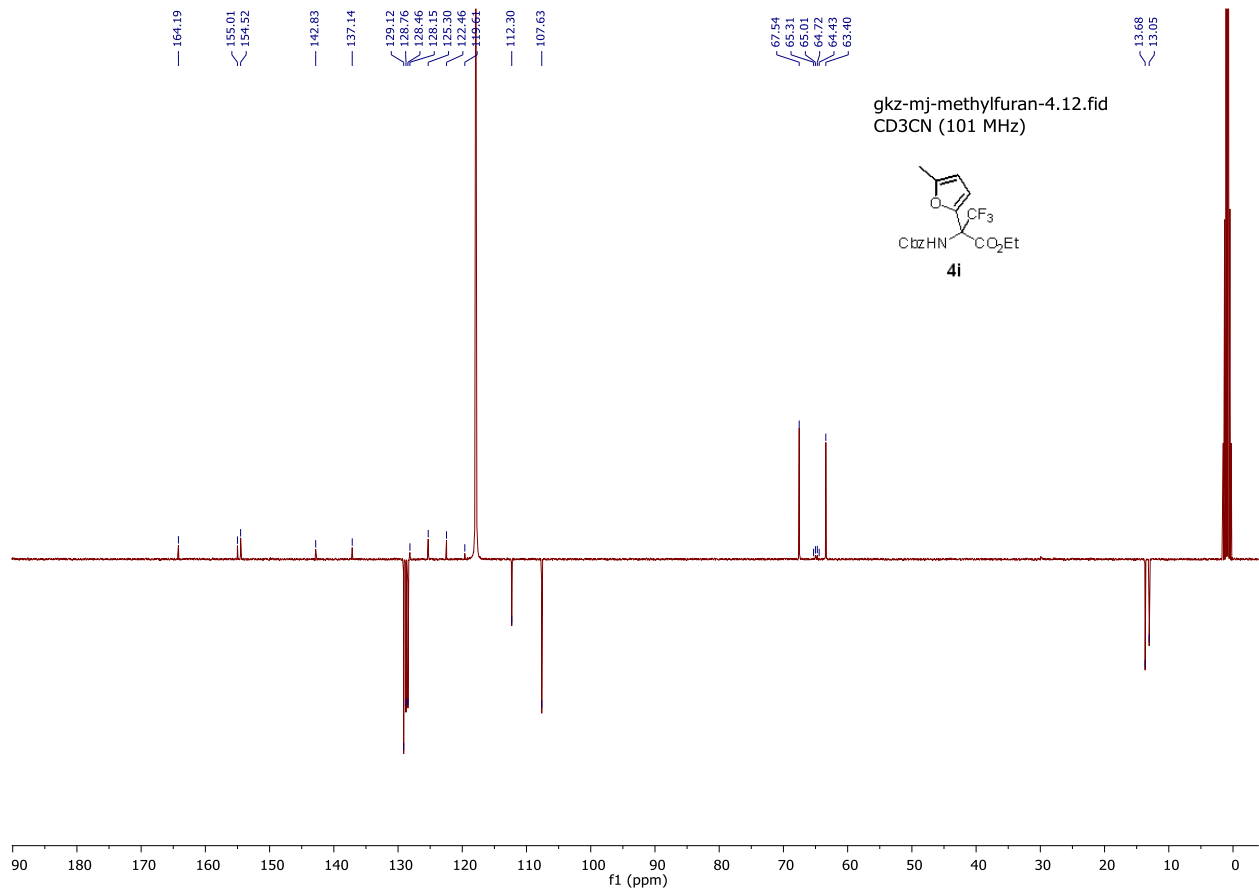

gkz-mz-19F-2.11.fid  
CDCl3 (376 MHz)

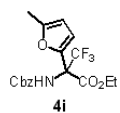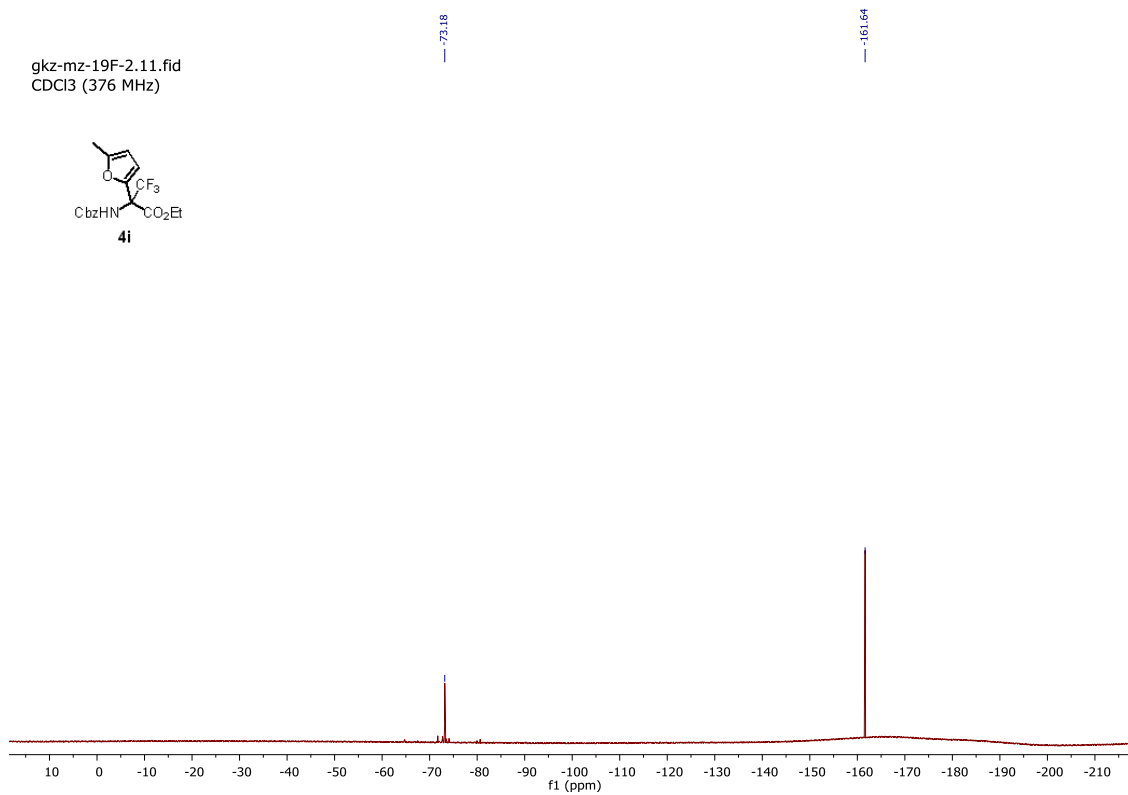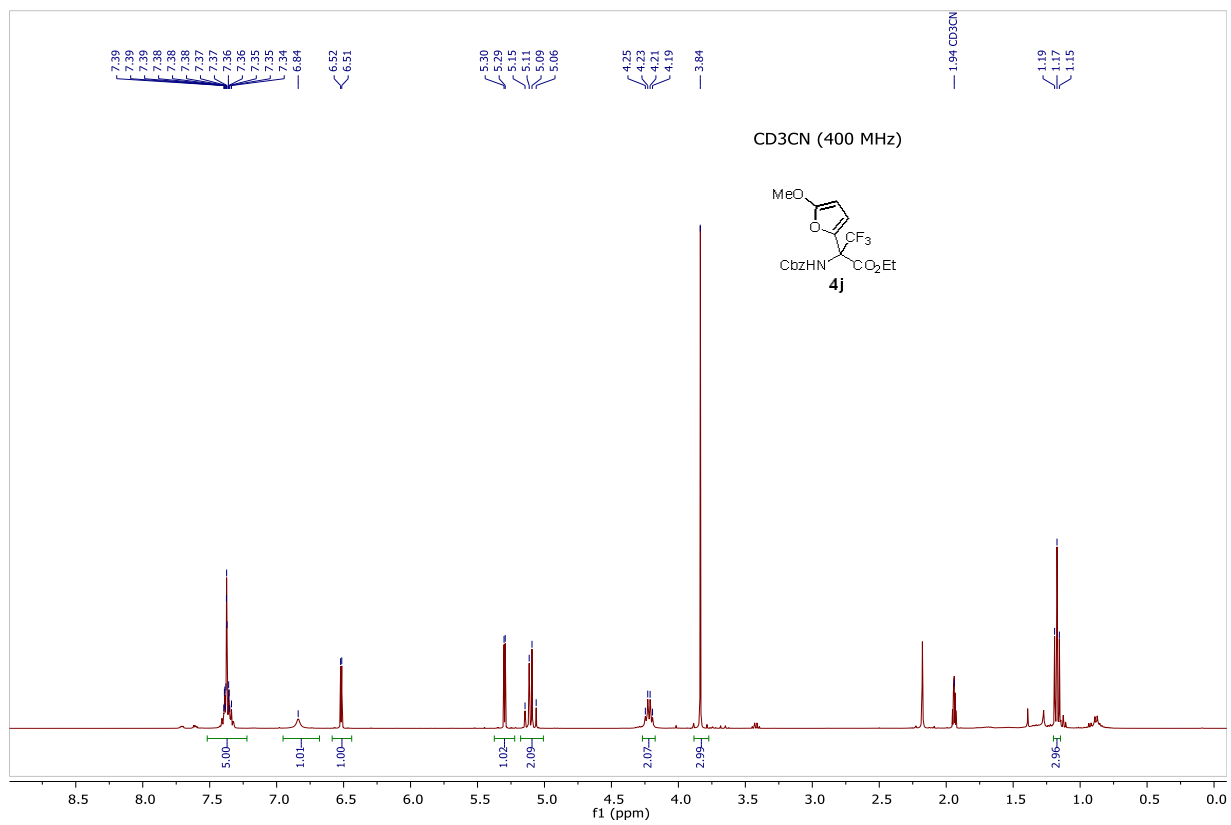

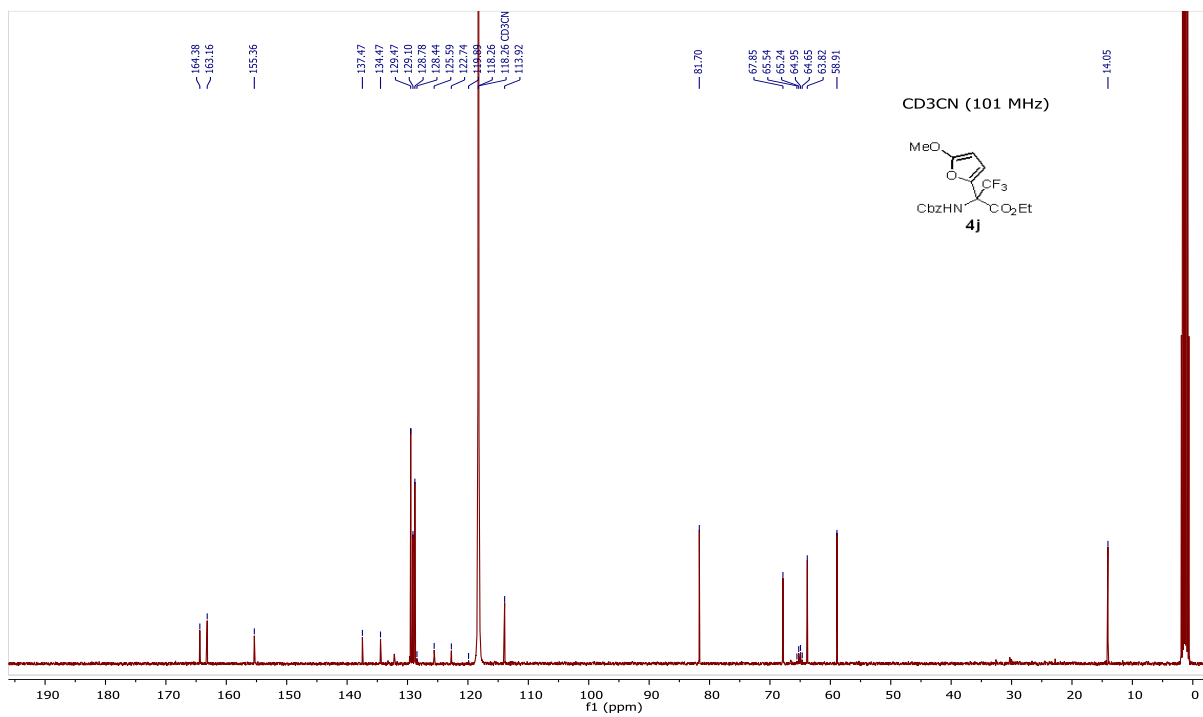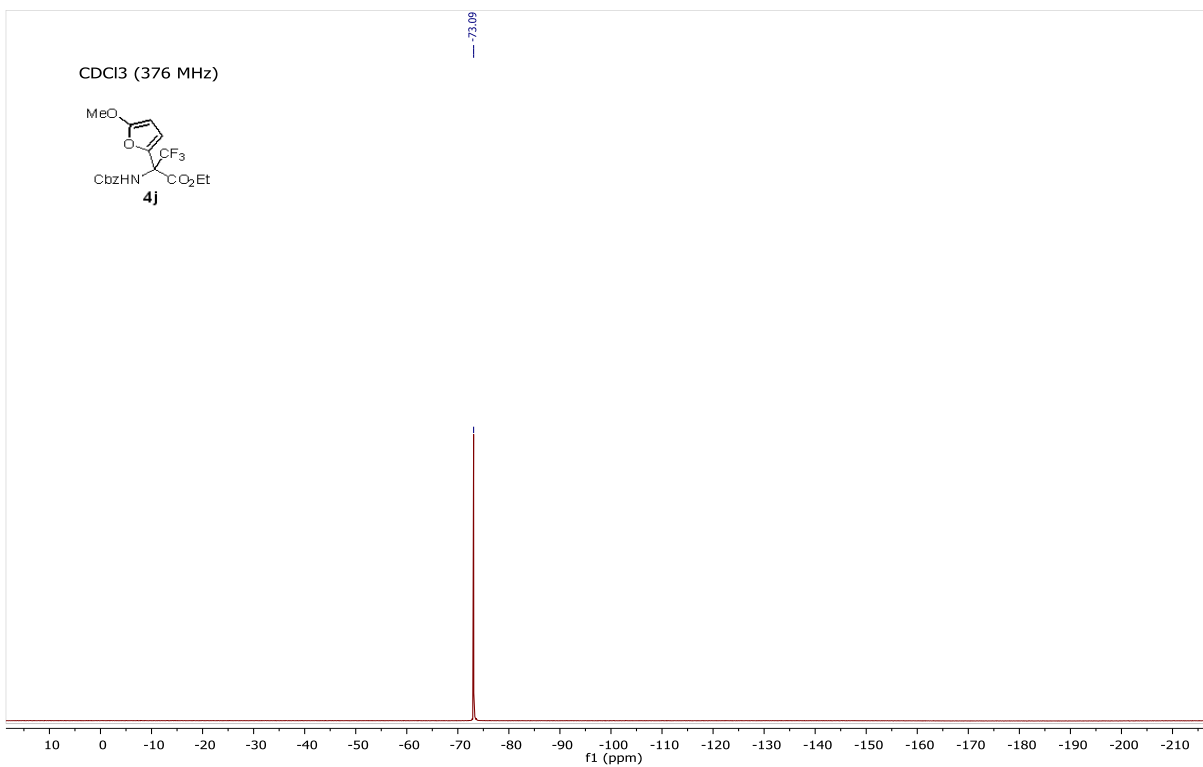

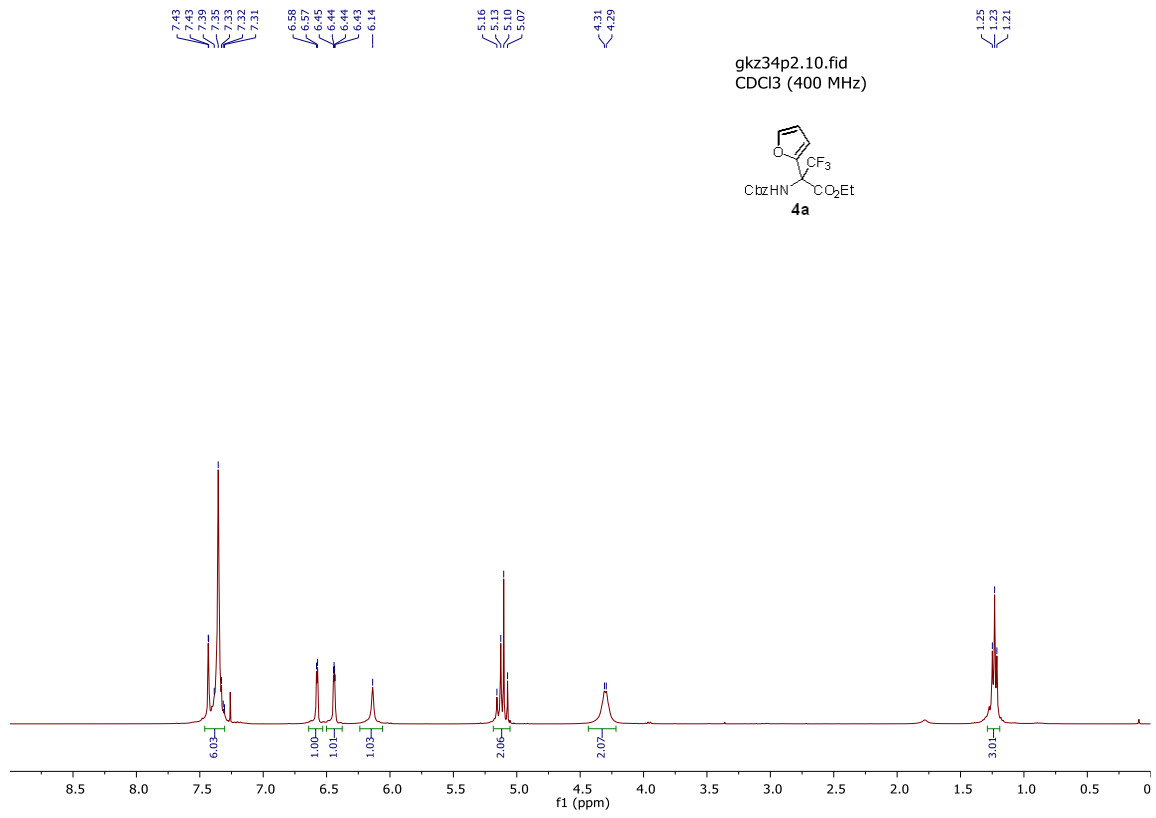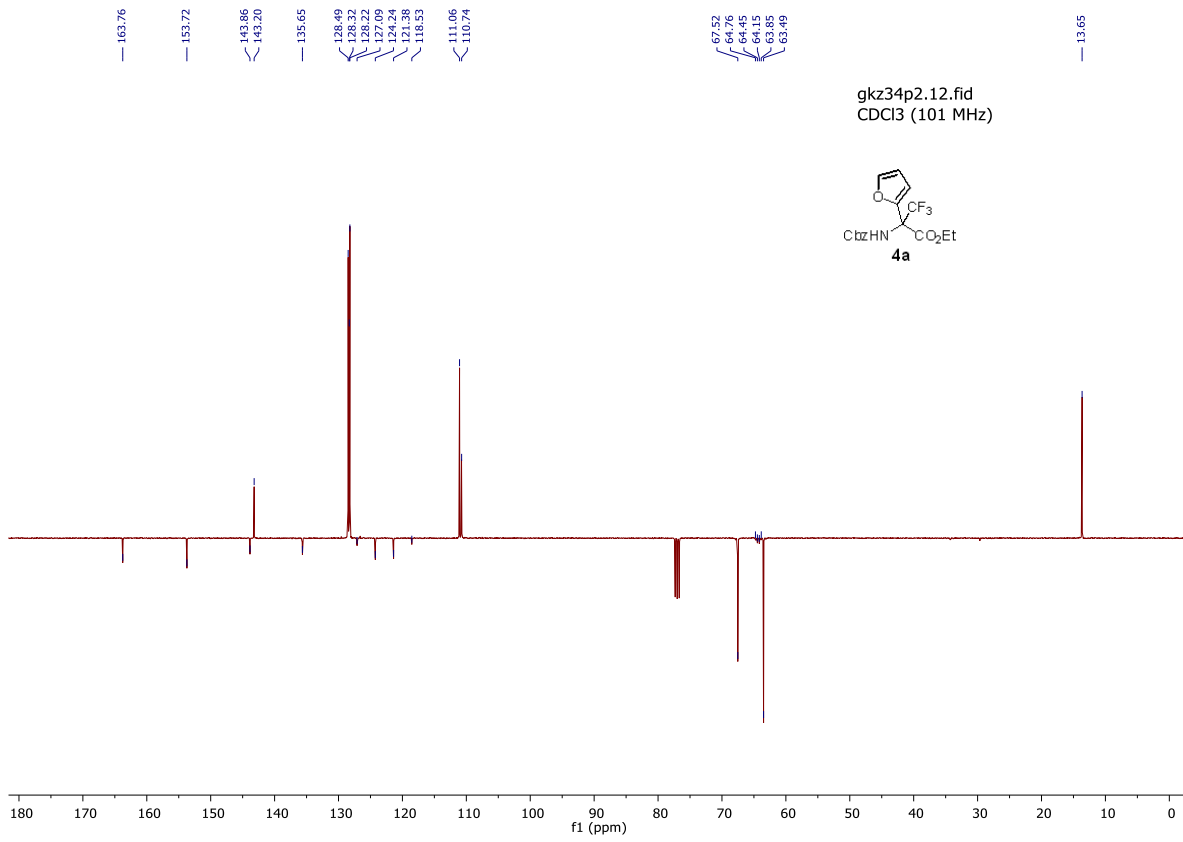

gkz34p2.11.fid  
CDCl3 (376 MHz)

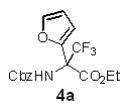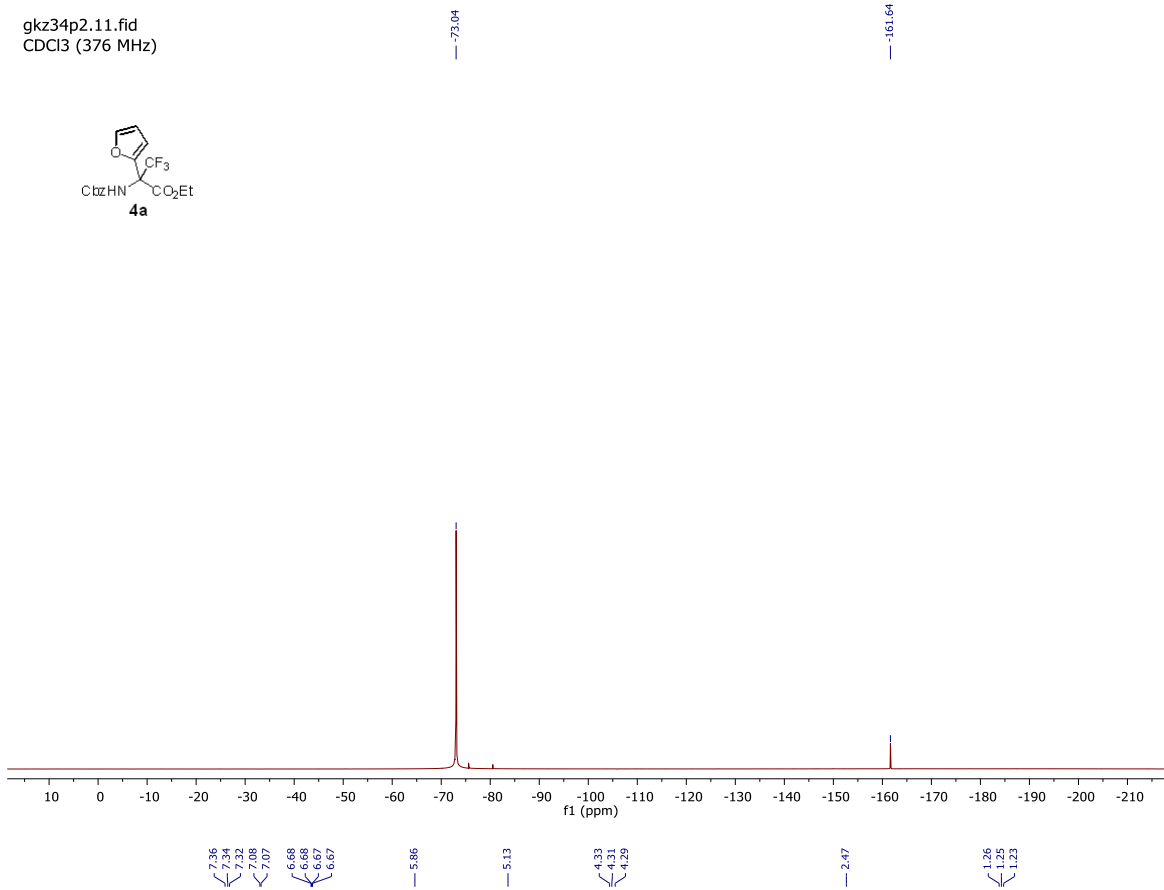

gkz35p2.10.fid  
CDCl3 (400 MHz)

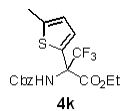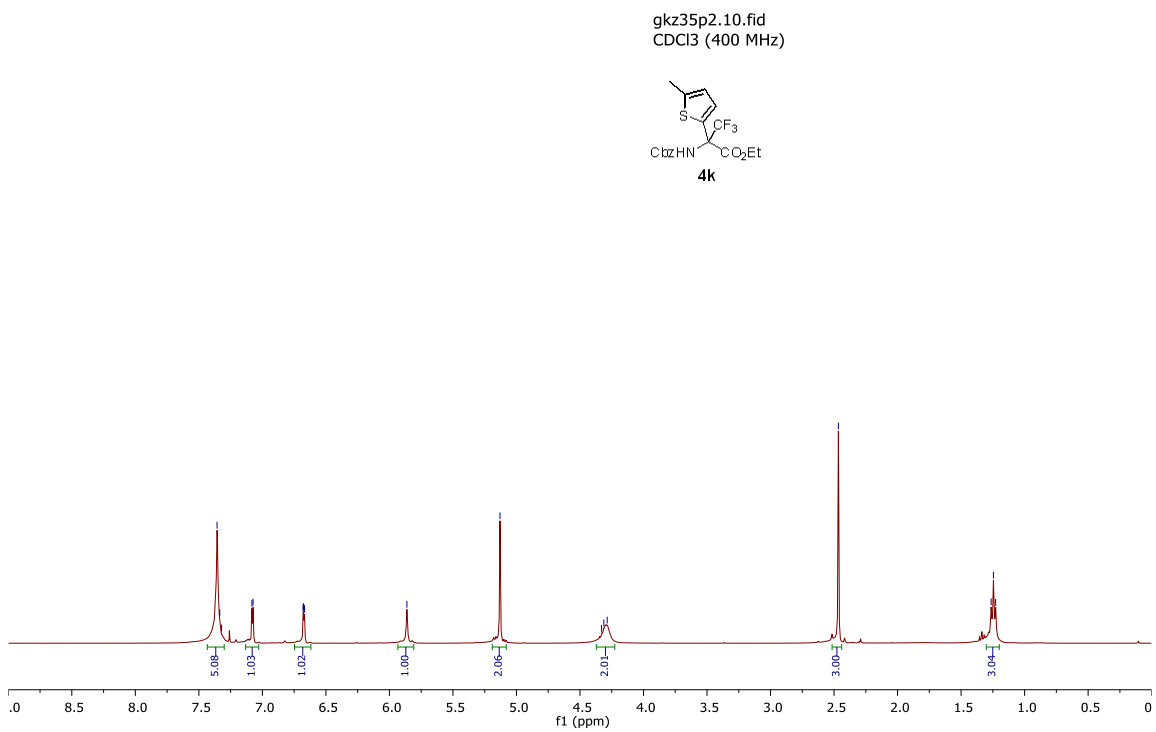



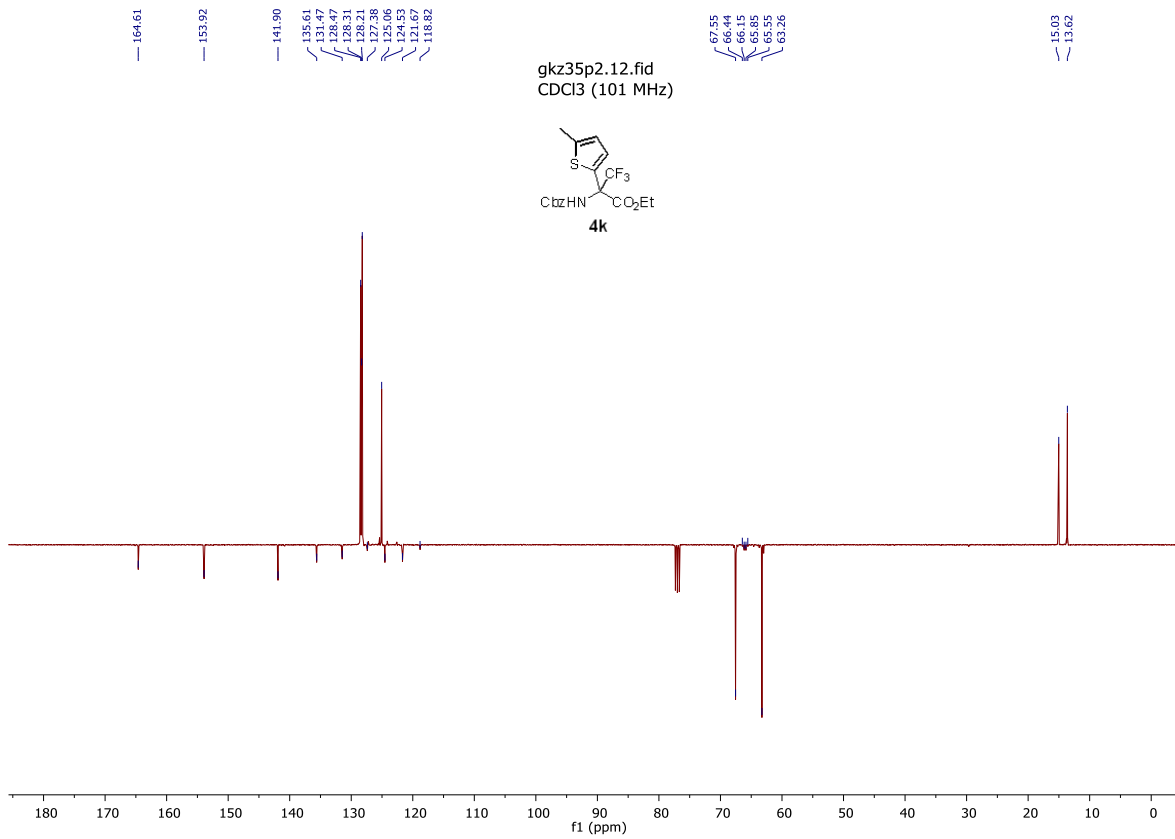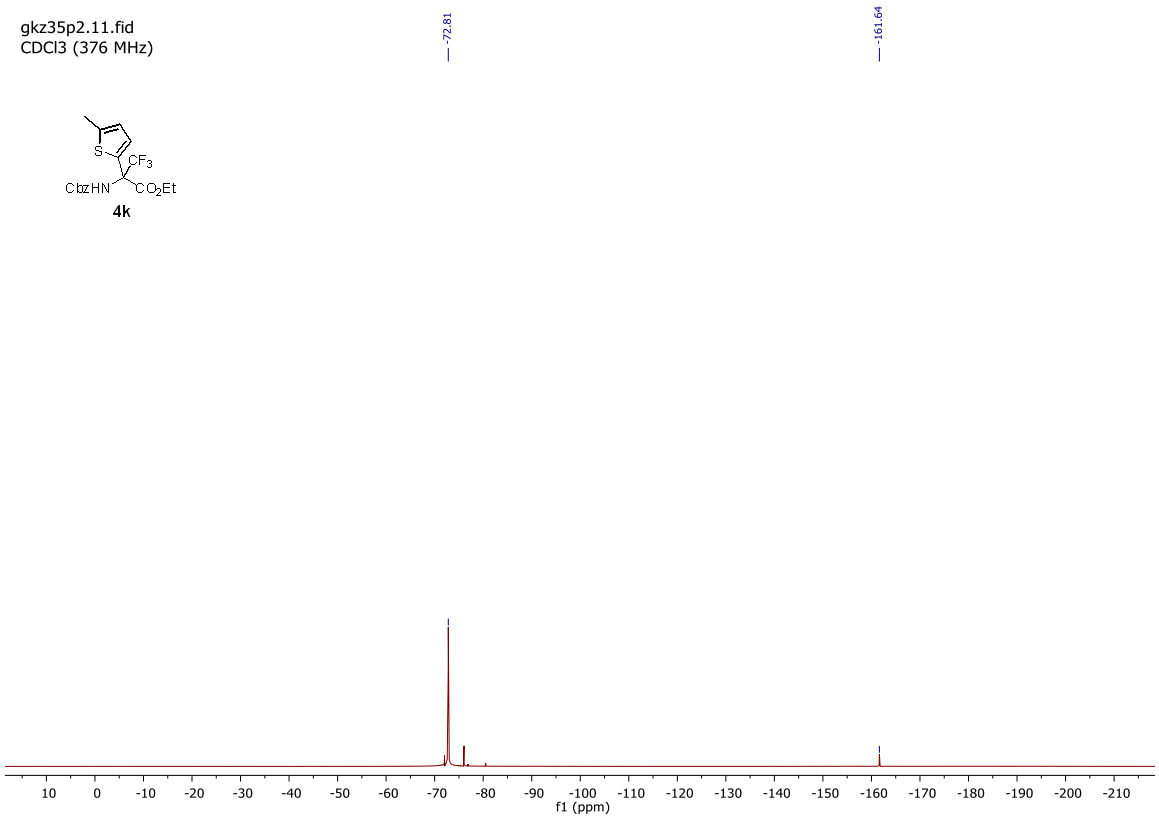

7.32  
7.05  
6.90  
6.89  
6.84  
6.82

5.06  
5.03  
4.99  
4.96

4.31  
4.29  
4.27  
4.25

3.76  
3.72

1.21  
1.19  
1.18

gkz20p2n2.10.fid  
CDCl<sub>3</sub> (400 MHz)

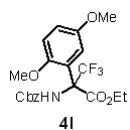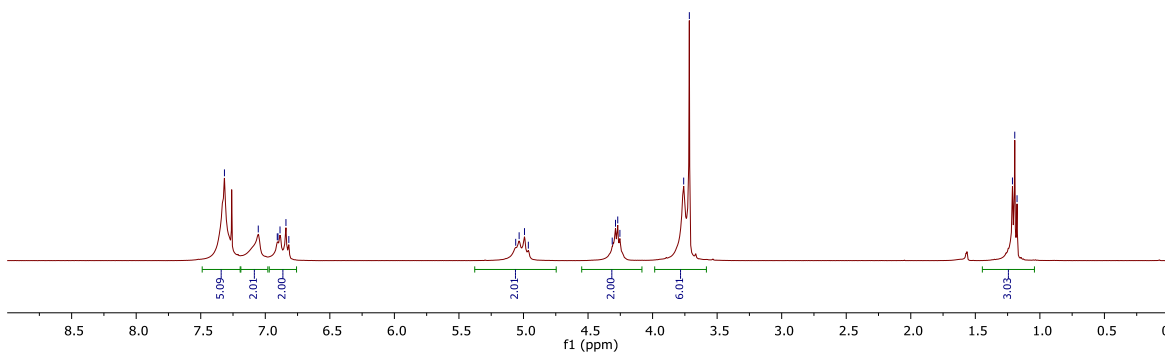

166.49  
153.68  
153.22  
150.99  
136.16  
128.41  
128.36  
125.20  
122.42  
121.39  
119.54  
116.65  
112.72

67.06  
66.88  
66.20  
63.24  
56.25  
55.60

13.70

gkz20p2n2.20.fid  
CDCl<sub>3</sub> (101 MHz)

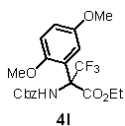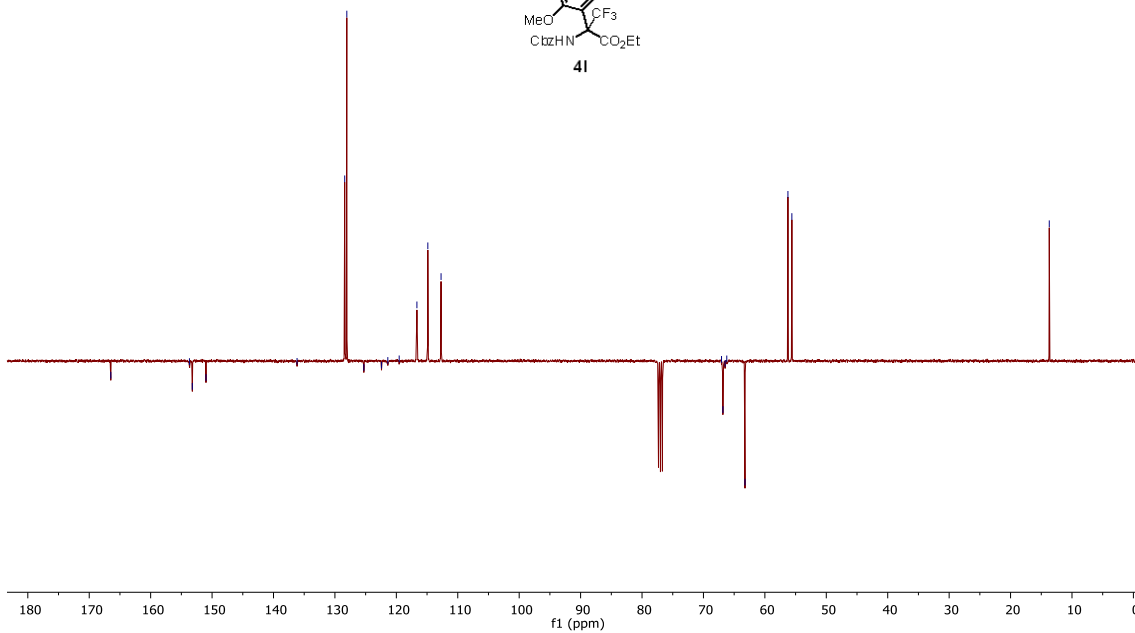

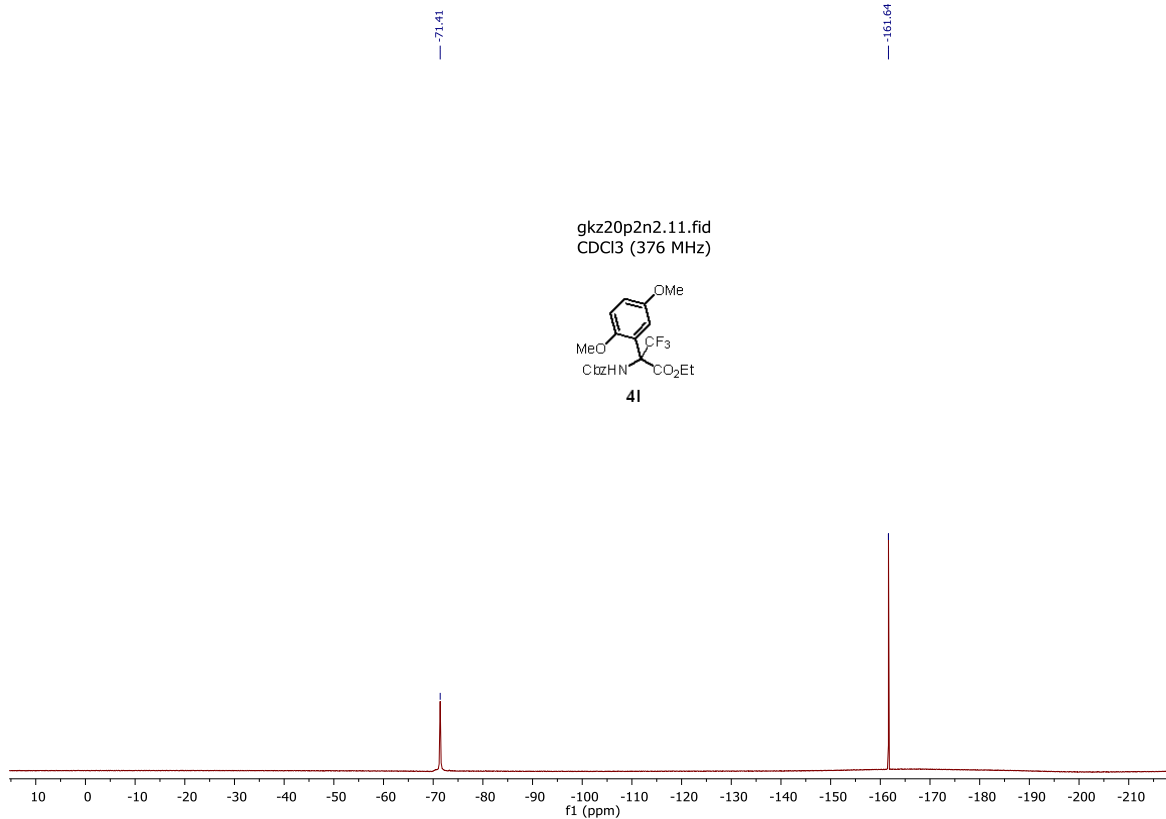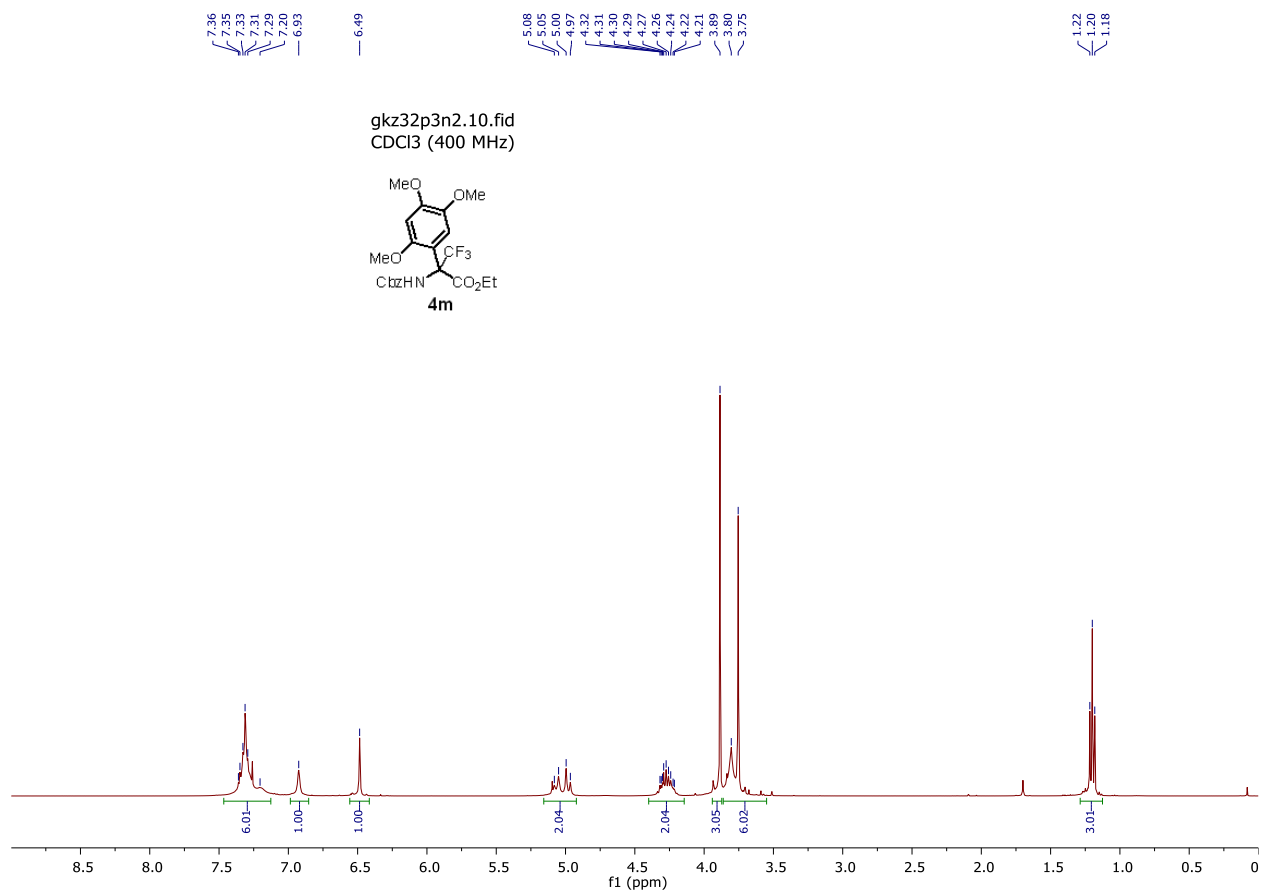

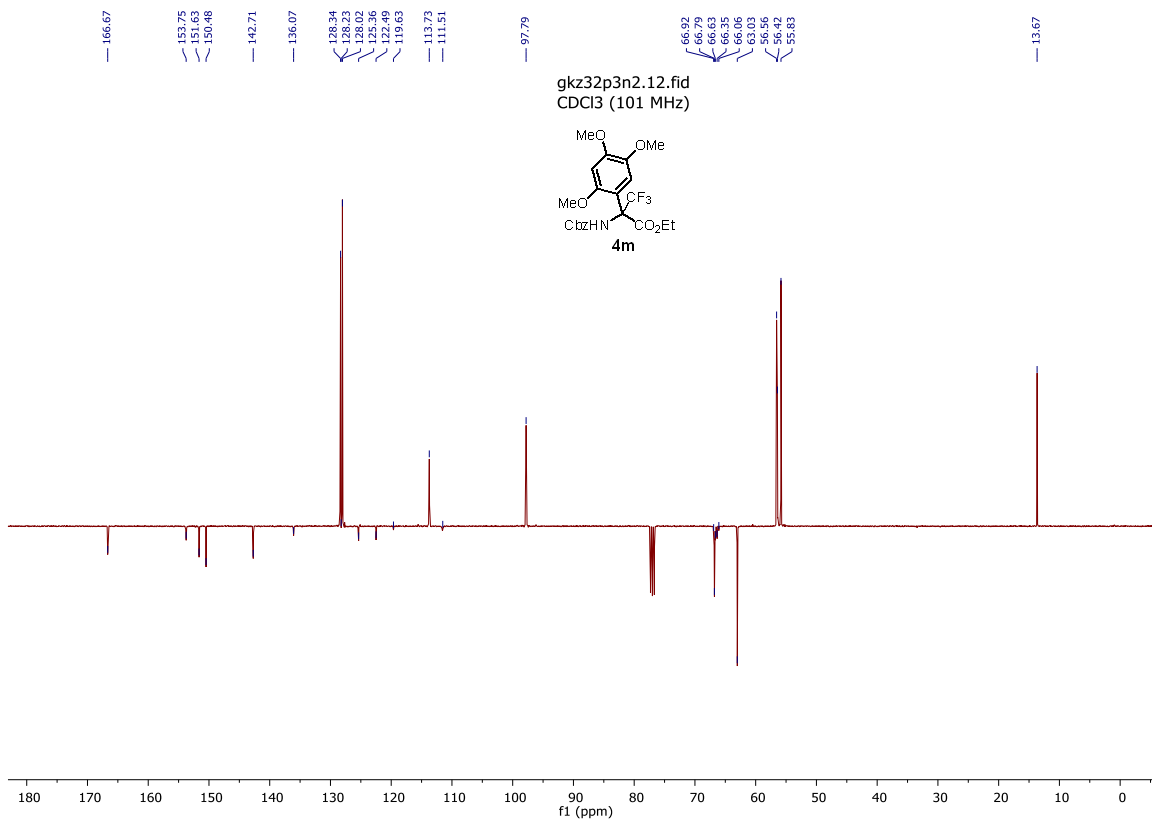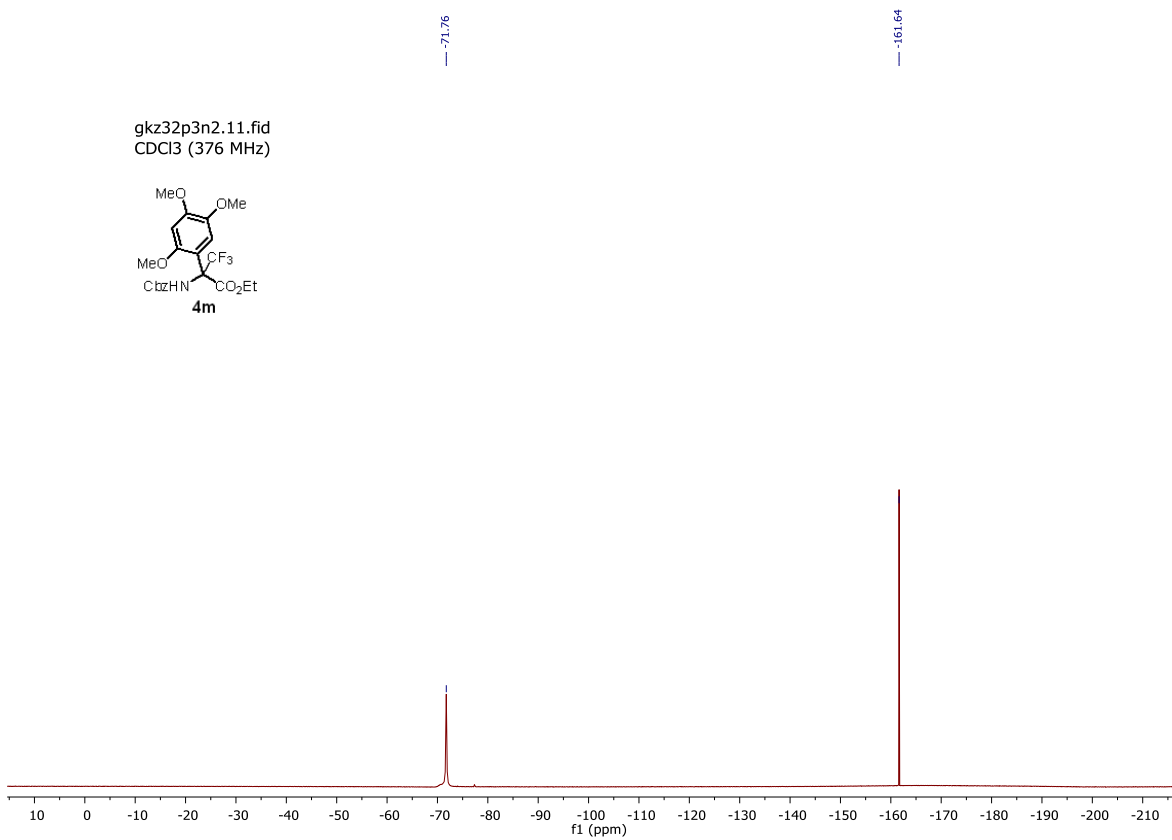

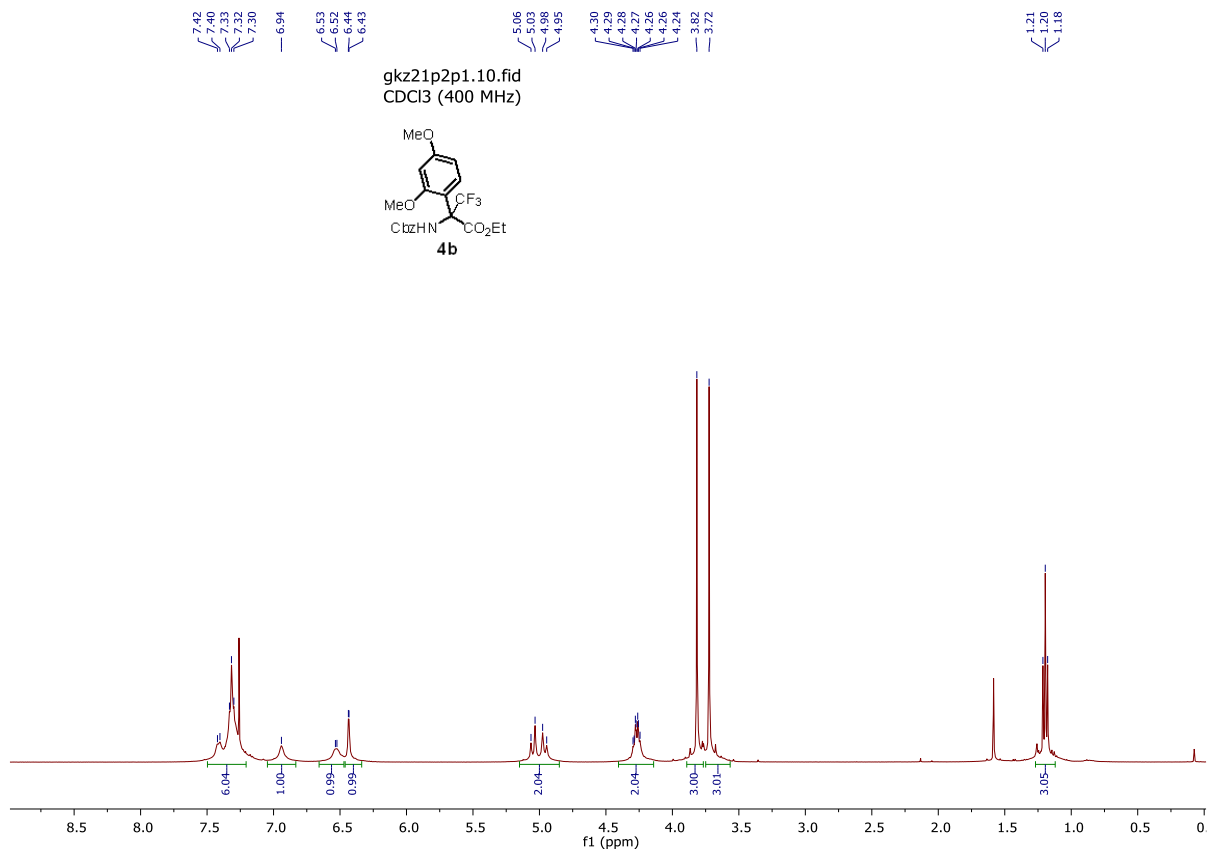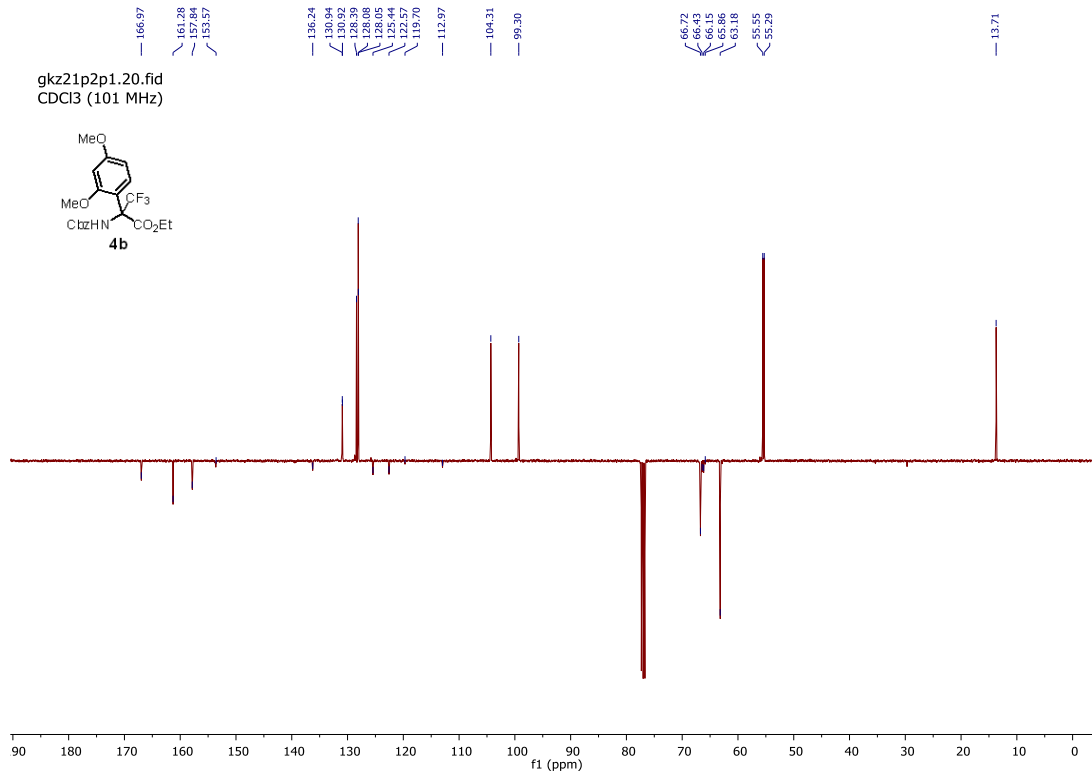

gkz21p2p1.11.fid  
CDCl3 (376 MHz)

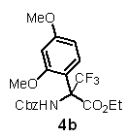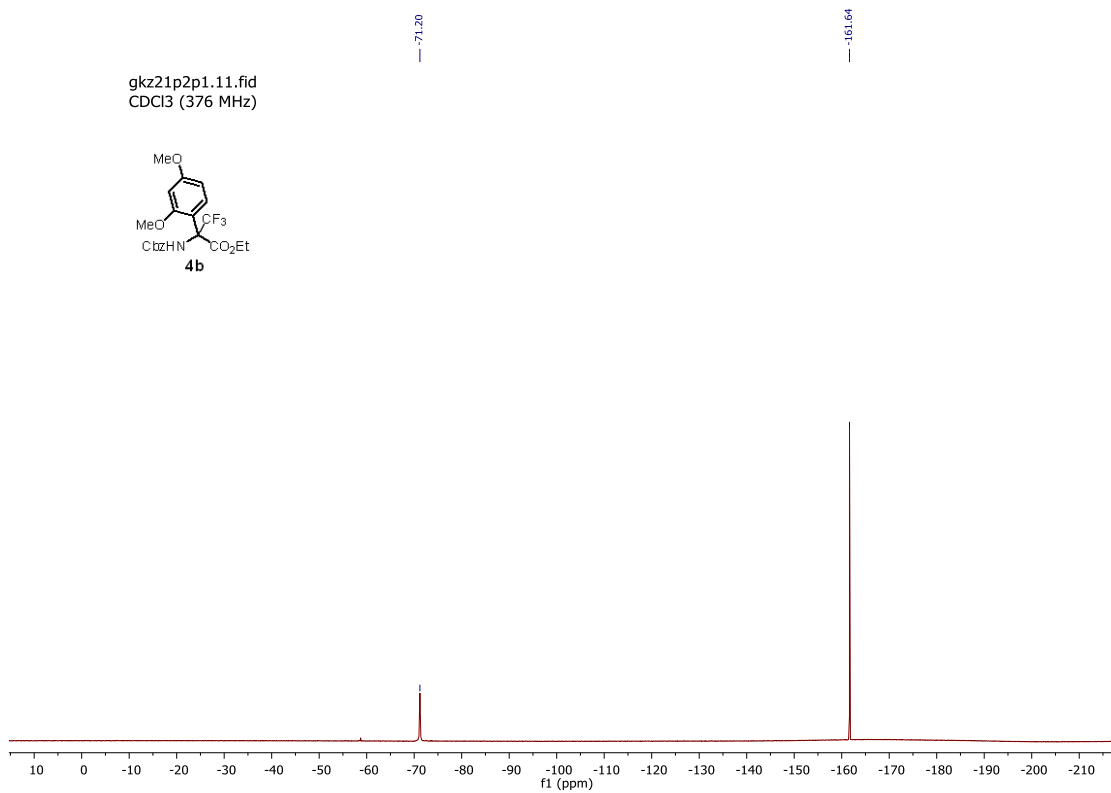

gkz31p2p1.10.fid  
CDCl3 (400 MHz)

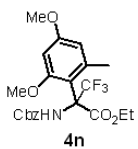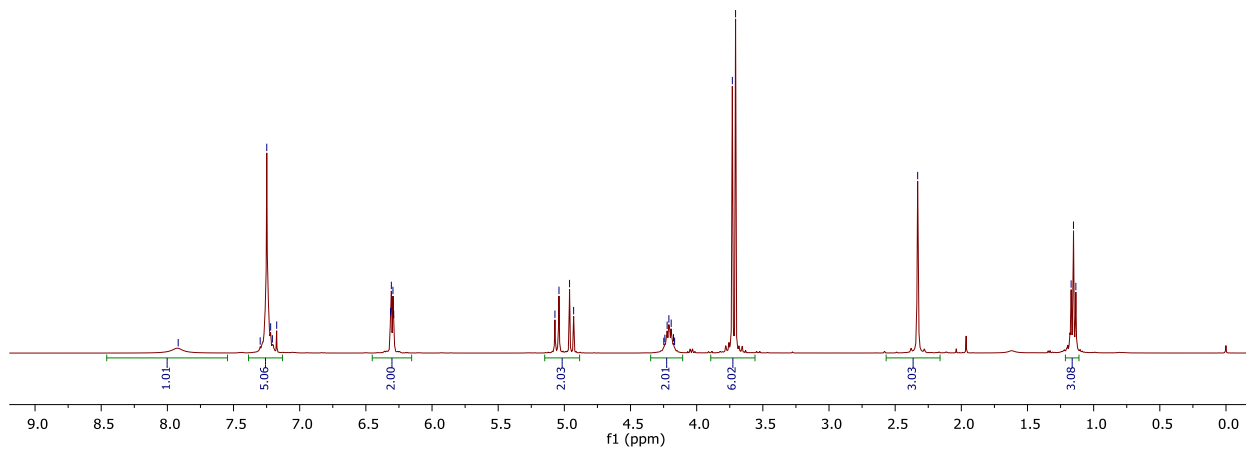

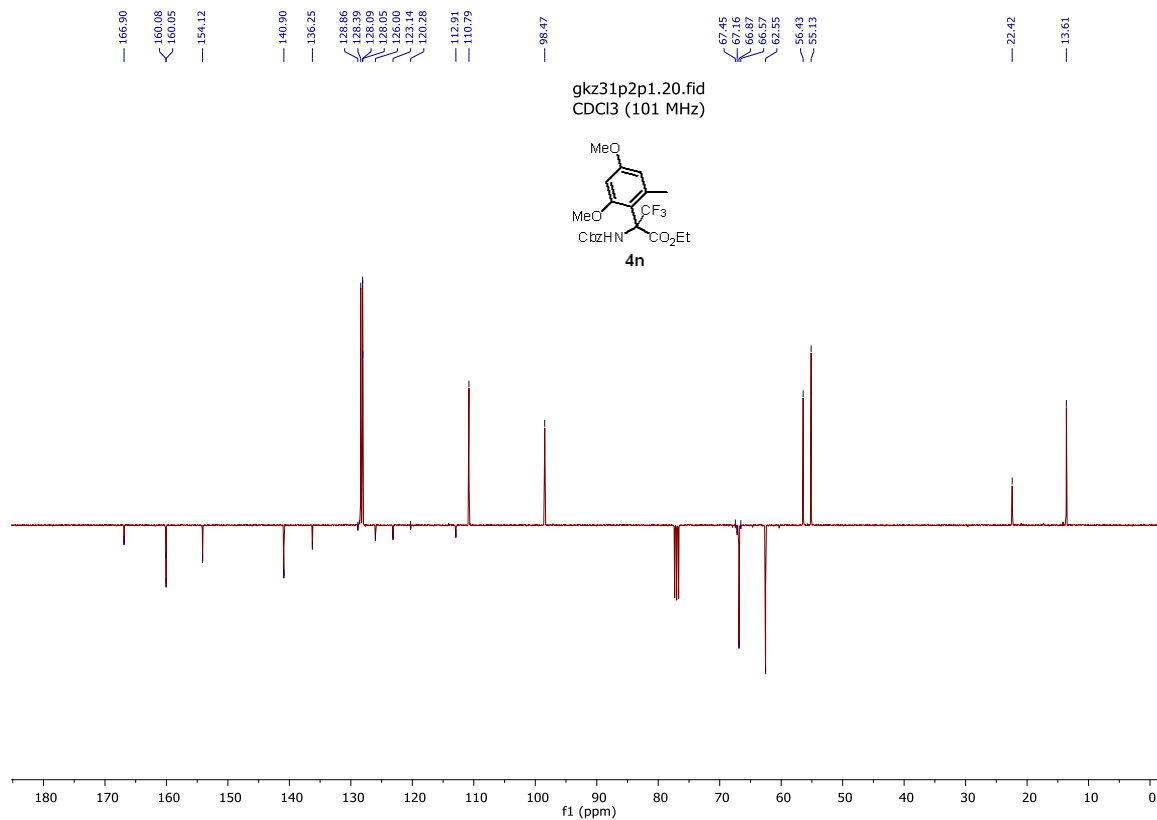

gkz31p2p1.11.fid  
CDCl<sub>3</sub> (376 MHz)

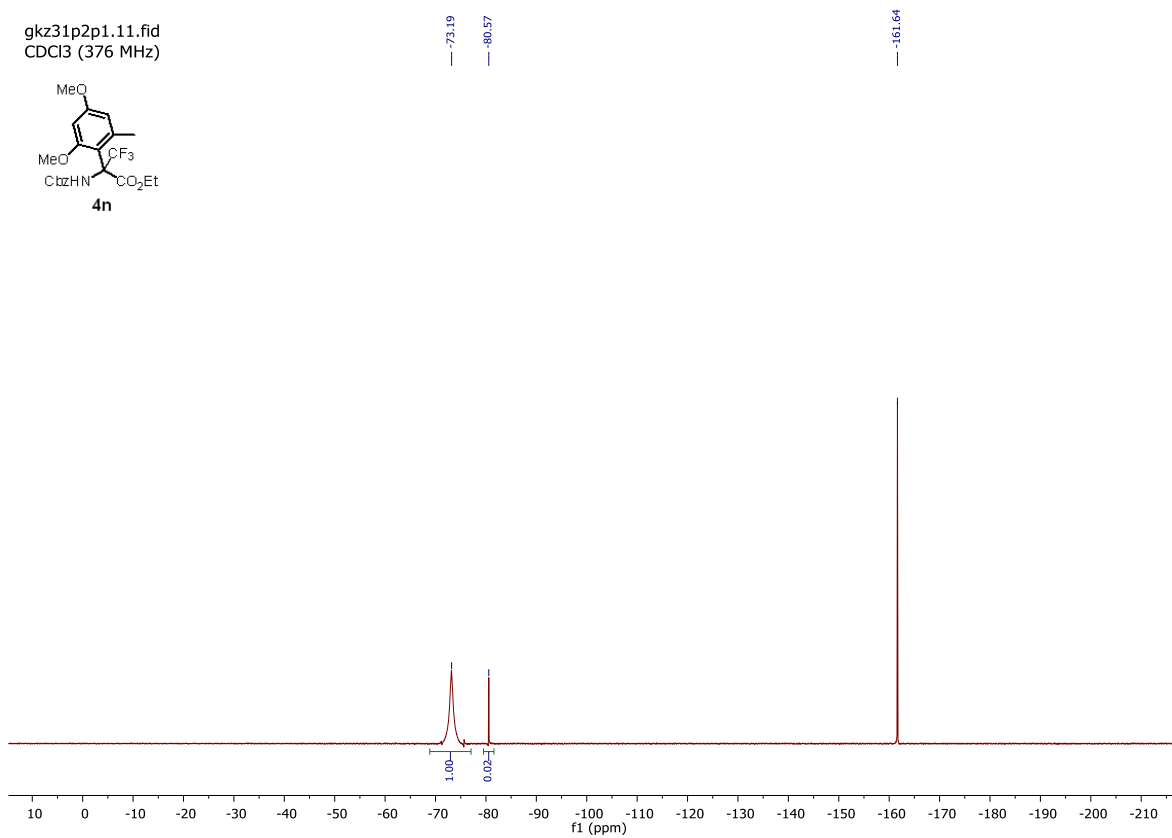

gkz31p3n6  
CDCl<sub>3</sub> (400 MHz)

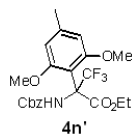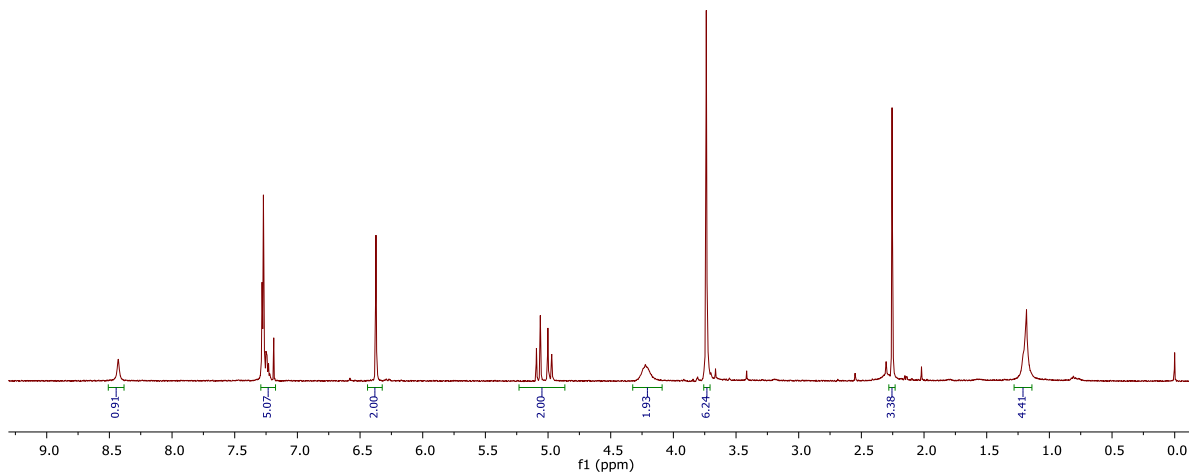

gkz31p3n3.11.fid  
CDCl<sub>3</sub> (376 MHz)

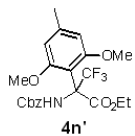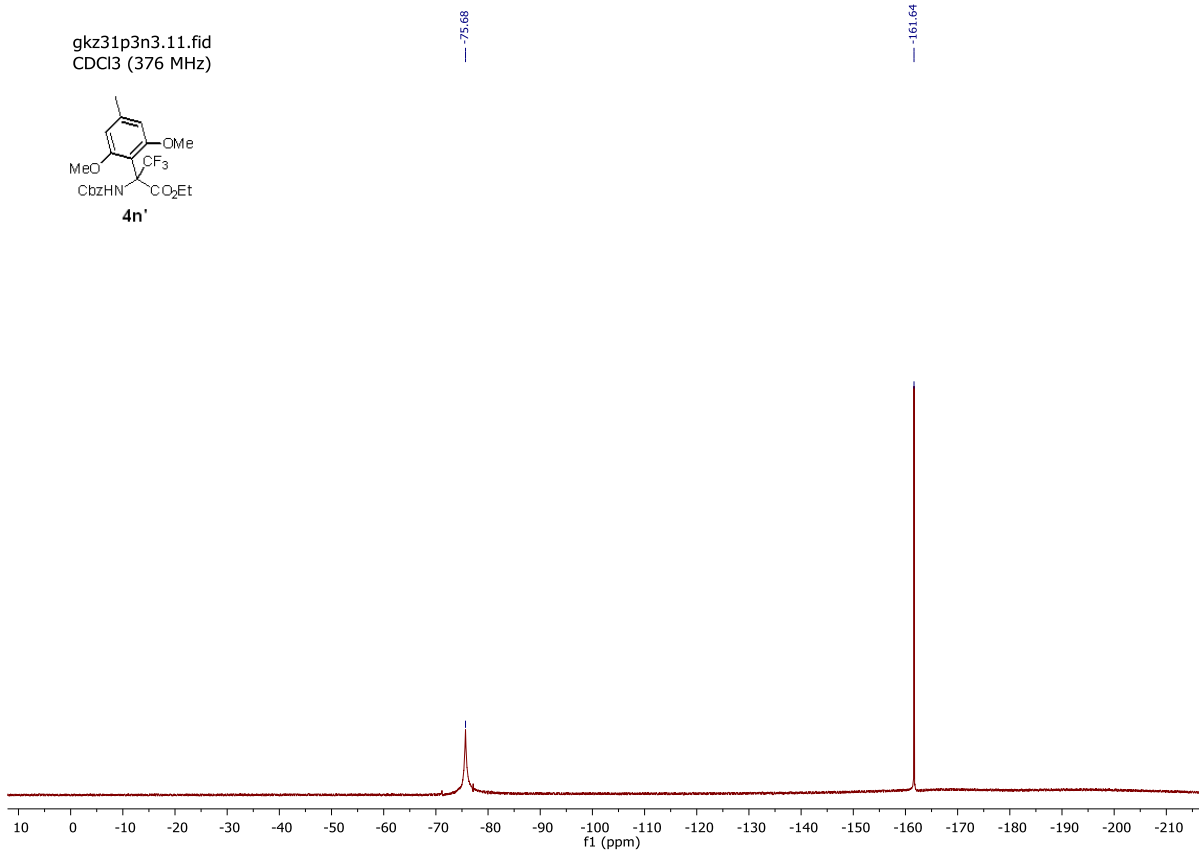



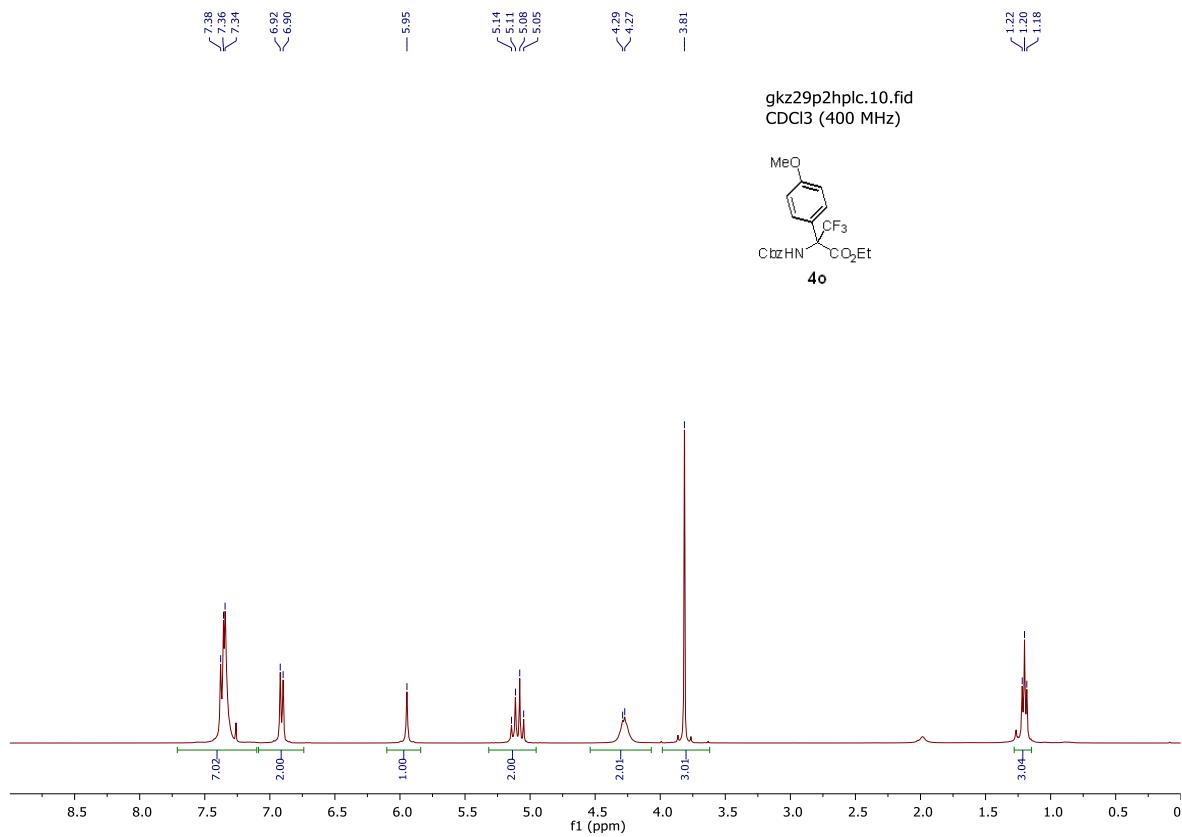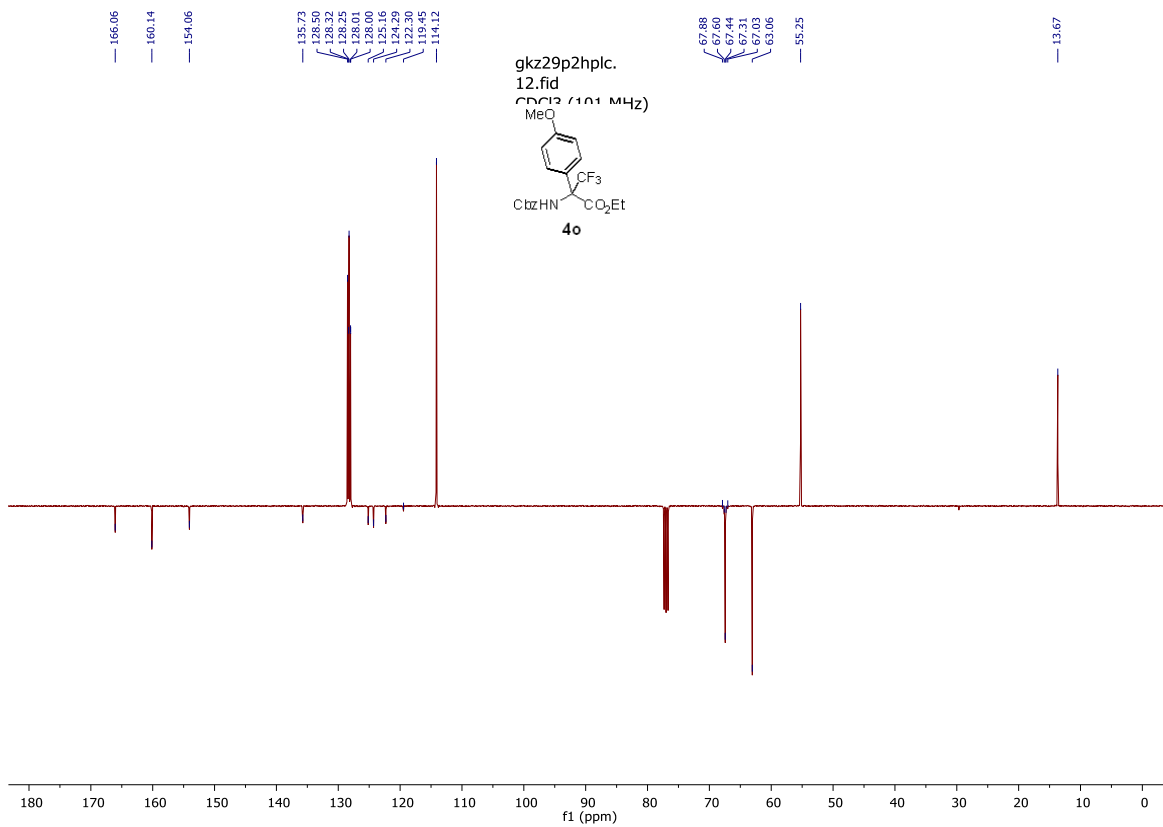

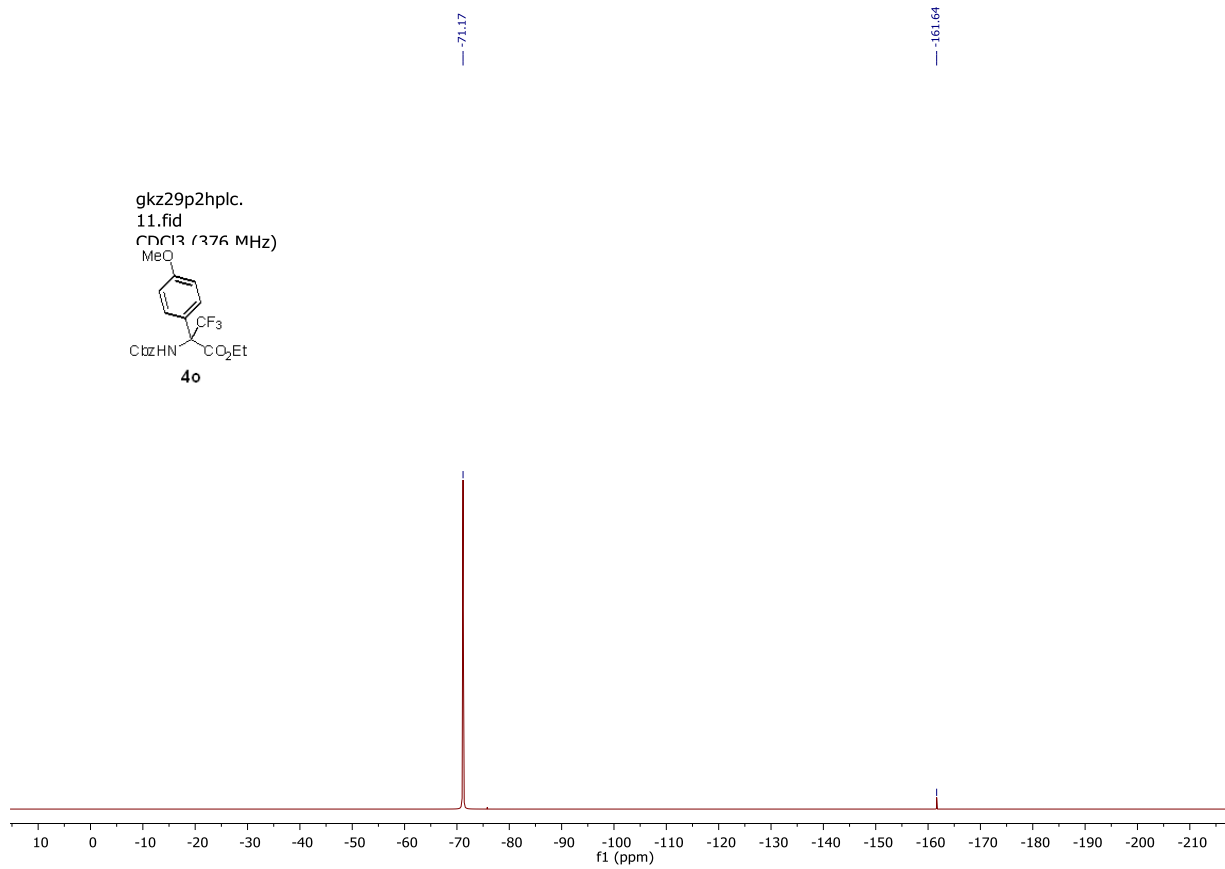

8.27  
8.25  
7.91  
7.83  
7.81  
7.79  
7.79  
7.50  
7.49  
7.48  
7.48  
7.47  
7.46  
7.45  
7.45  
7.40  
7.36  
7.36  
7.34  
7.32  
7.31  
7.30  
7.28

5.14  
5.03  
5.00

4.26  
4.25  
4.25  
4.20  
4.19  
4.18  
3.96

1.10  
1.06  
1.06

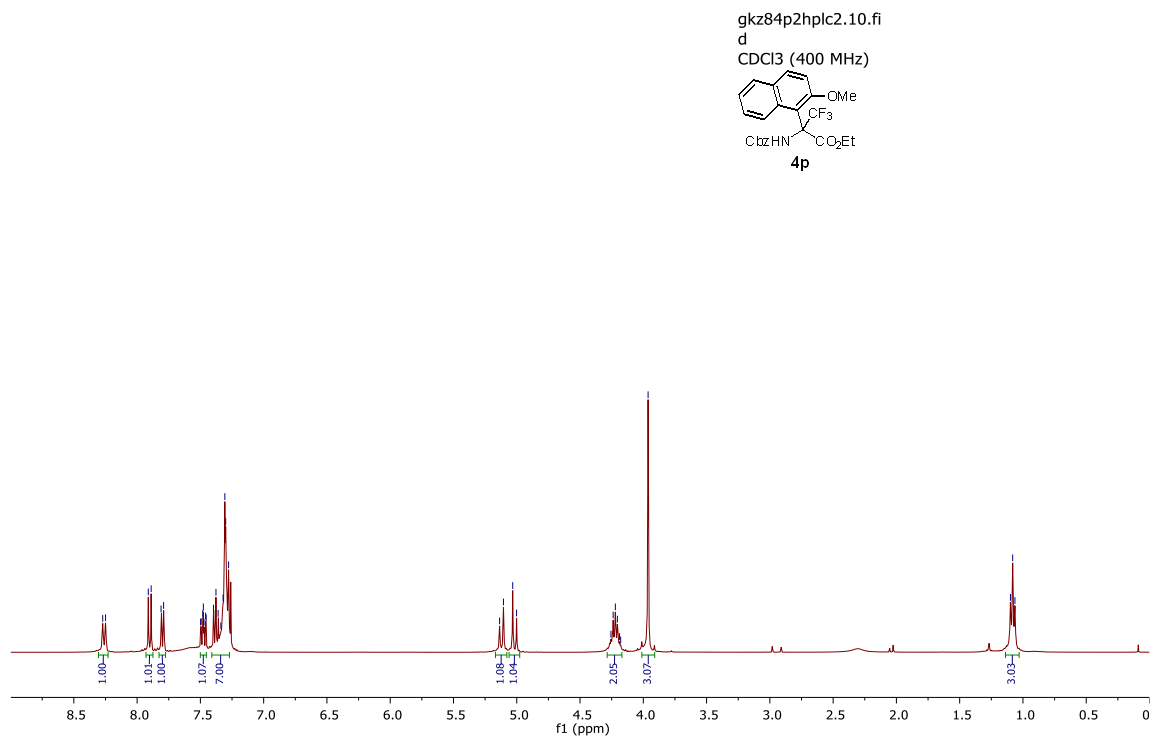

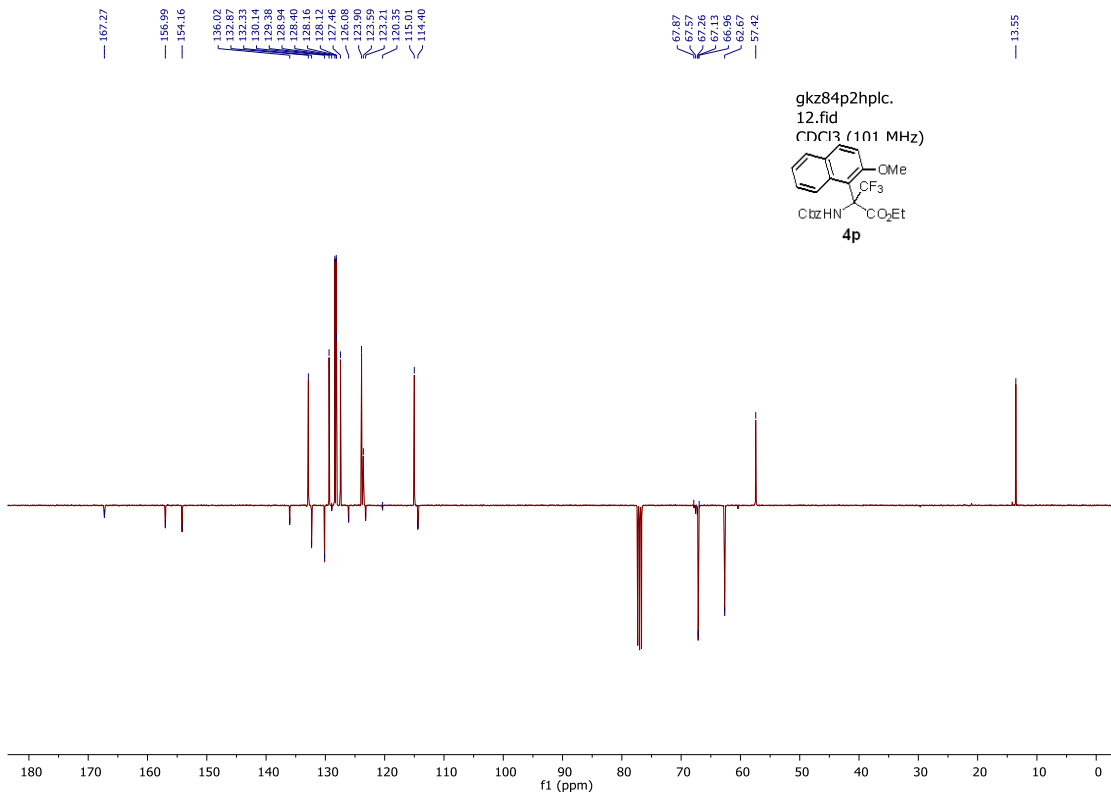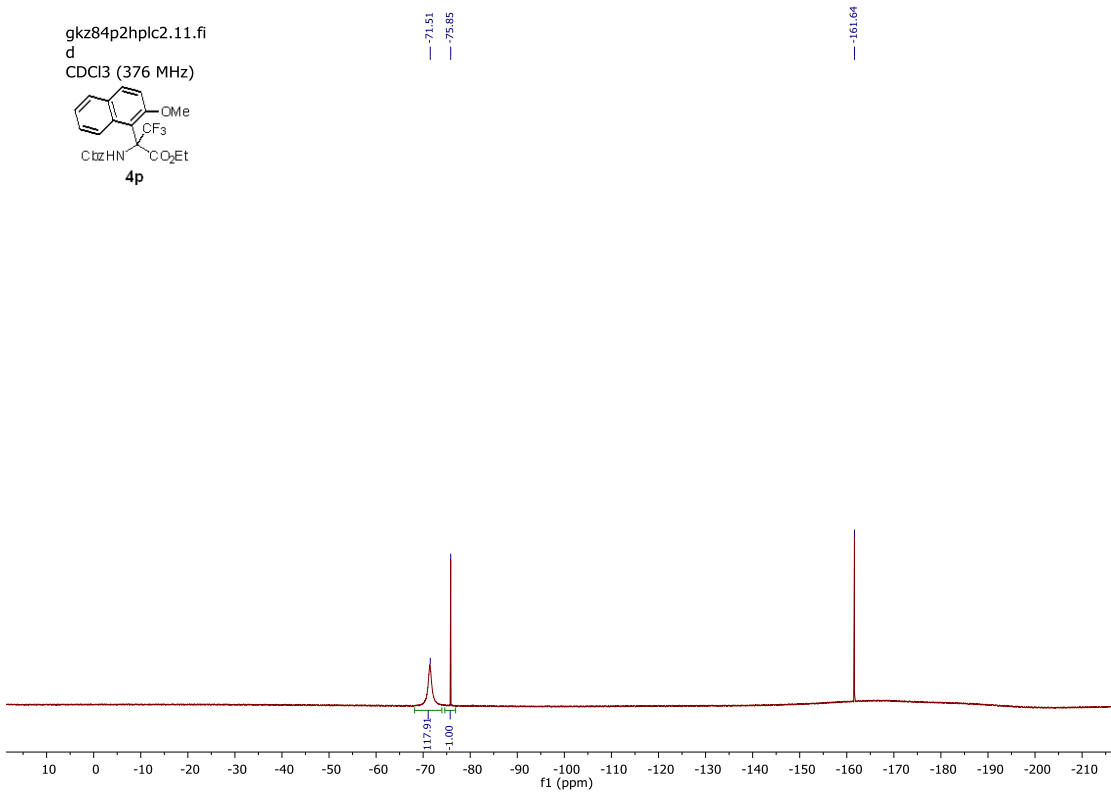

Supplement: NIHMS1643093-supplement-Supporting_Information.pdf [file NIHMS1643093-supplement-Supporting_Information.pdf]
